# Supplementary material
Source: publisher site journal article supplement (https://www.spandidos-publications.com/2424/downloadSupplementary)
Supplement: Supplementary file 1 [file downloadSupplementary]

## Sheet: 差异蛋白详情表
Table SIV. Detailed table of difference protein between GEO-BPA and control group.
Accession	Description	FC(GEO-BPA/BPA)	Log2FC(GEO-BPA/BPA)	P_value(GEO-BPA/BPA)	Regulate	Significant	GEO-BPA	BPA	GO Term	GO ID	KO ID	KO Name	Pathway ID	Pathway_defition	COG ID	COG_Functional Categories	Pfam ID	Domain	Domain Description	Subcellular Loc	Unique Peptides	Coverage（%）	MW [kDa]	FDR Confidence
Q9H8M2	Bromodomain-containing protein 9 OS=Homo sapiens OX=9606 GN=BRD9 PE=1 SV=2	0.22327	-2.16314	0.004266	down	yes	1.136	5.088	BP:regulation of primary metabolic process;BP:regulation of metabolic process;BP:quinone metabolic process;BP:small molecule biosynthetic process;BP:organic cyclic compound biosynthetic process;BP:cellular component organization or biogenesis;BP:single-organism metabolic process;BP:single-organism biosynthetic process;BP:regulation of macromolecule metabolic process;BP:regulation of RNA biosynthe…	GO:0080090;GO:0019222;GO:1901661;GO:0044283;GO:1901362;GO:0071840;GO:0044710;GO:0044711;GO:0060255;GO:2001141;GO:0055114;GO:0046483;GO:0019438;GO:0044281;GO:0006807;GO:0050789;GO:0097659;GO:1901576;GO:0051186;GO:0044260;GO:1901663;GO:0051188;GO:0016043;GO:0065007;GO:1901360;GO:0018130;GO:0009889;GO:0050794;GO:0008150;GO:0008152;GO:0034654;GO:0016070;GO:0044271;GO:0015980;GO:0006355;GO:0010556;GO:…	K11723	BRD7_9	------	------	------	------	PF12024.5;PF00439.22	DUF3512;Bromodomain	Domain of unknown function;Bromodomain	nuclear	1	1	67	Medium
A0A087WWM0	Trafficking protein particle complex subunit OS=Homo sapiens OX=9606 GN=TRAPPC3 PE=1 SV=1	0.482292	-1.05202	0.0159	down	yes	1.852	3.84	BP:COPII vesicle coating;BP:cellular component assembly;BP:macromolecular complex subunit organization;BP:vesicle coating;BP:cellular component organization or biogenesis;BP:ER to Golgi vesicle-mediated transport;BP:protein complex subunit organization;BP:cellular component organization;BP:macromolecular complex assembly;BP:single-organism process;BP:transport;BP:cellular process;BP:Golgi vesicle…	GO:0048208;GO:0022607;GO:0043933;GO:0006901;GO:0071840;GO:0006888;GO:0071822;GO:0016043;GO:0065003;GO:0044699;GO:0006810;GO:0009987;GO:0048193;GO:0006461;GO:0044765;GO:0008150;GO:0051649;GO:0051234;GO:0051179;GO:1902578;GO:0016192;GO:0006996;GO:0046907;GO:0016050;GO:1902582;GO:0005783;GO:0043229;GO:0043227;GO:0043226;GO:0044446;GO:0031090;GO:0016020;GO:0030008;GO:0044431;GO:0005794;GO:0098588;GO:…	------	------	------	------	------	------	PF04051.13	TRAPP	Transport protein particle	cytoplasmic	1	4	21.2	Medium
C9JF17	Apolipoprotein D (Fragment) OS=Homo sapiens OX=9606 GN=APOD PE=1 SV=1	0.419852	-1.25205	0.03787	down	yes	1.472	3.506	BP:regulation of intracellular protein transport;BP:negative regulation of lipoprotein oxidation;BP:regulation of lipoprotein oxidation;BP:regulation of metabolic process;BP:regulation of transport;BP:negative regulation of response to stimulus;BP:negative regulation of intracellular transport;BP:regulation of response to stimulus;BP:response to axon injury;BP:negative regulation of defense respo…	GO:0033157;GO:0034443;GO:0034442;GO:0019222;GO:0051049;GO:0048585;GO:0032387;GO:0048583;GO:0048678;GO:0031348;GO:0007162;GO:0044710;GO:0044281;GO:0051893;GO:0051895;GO:0080090;GO:0051716;GO:0010605;GO:0009968;GO:0071704;GO:0009966;GO:0032101;GO:0009611;GO:0060588;GO:1904590;GO:0045833;GO:0048519;GO:0032386;GO:2000405;GO:0031103;GO:0031102;GO:1901889;GO:1901888;GO:0060255;GO:0042493;GO:2000098;GO:…	K03098	APOD	------	------	COG3040	M:Cell wall/membrane/envelope biogenesis	PF08212.9;PF00061.20	Lipocalin_2;Lipocalin	Lipocalin-like domain;Lipocalin / cytosolic fatty-acid binding protein family	lysosomal	1	3	24.1	Medium
Q99643	Succinate dehydrogenase cytochrome b560 subunit, mitochondrial OS=Homo sapiens OX=9606 GN=SDHC PE=1 SV=1	0.415488	-1.26712	0.000651	down	yes	1.116	2.686	BP:cell projection organization;BP:carboxylic acid metabolic process;BP:neuron projection development;BP:generation of precursor metabolites and energy;BP:cellular component organization or biogenesis;BP:single-organism metabolic process;BP:tricarboxylic acid metabolic process;BP:cellular component organization;BP:organic substance metabolic process;BP:single-organism process;BP:respiratory elect…	GO:0030030;GO:0019752;GO:0031175;GO:0006091;GO:0071840;GO:0044710;GO:0072350;GO:0016043;GO:0071704;GO:0044699;GO:0022904;GO:0044763;GO:0061564;GO:0044238;GO:0022900;GO:0009987;GO:0045333;GO:0008150;GO:0008152;GO:0043436;GO:0055114;GO:0015980;GO:0006082;GO:0006099;GO:0009060;GO:0006101;GO:0044237;GO:0006121;GO:0044281;GO:0098800;GO:0099512;GO:0099513;GO:0019866;GO:0045257;GO:1990204;GO:0043226;GO:…	K00236	SDHC, SDH3	hsa00190;hsa00020;hsa01200;hsa05012;hsa05016;hsa05010;hsa04932	Oxidative phosphorylation;Citrate cycl;Carbon metabolism;Parkinson's disease;Huntington's disease;Alzheimer's disease;Non-alcoholic fatty liver diseas	COG2009	C:Energy production and conversion	PF01127.19	Sdh_cyt	Succinate dehydrogenase/Fumarate reductase transmembrane subunit	mitochondrial	1	5	18.6	Medium
Q08043	Alpha-actinin-3 OS=Homo sapiens OX=9606 GN=ACTN3 PE=1 SV=2	0.725852	-0.462252	0.03807	down	yes	1.533	2.112	BP:nuclear transport;BP:regulation of phosphate metabolic process;BP:regulation of primary metabolic process;BP:regulation of metabolic process;BP:response to muscle inactivity involved in regulation of muscle adaptation;BP:negative regulation of response to stimulus;BP:regulation of response to stimulus;BP:negative regulation of calcium-mediated signaling;BP:regulation of calcium-mediated signal…	GO:0051169;GO:0019220;GO:0080090;GO:0019222;GO:0014877;GO:0048585;GO:0048583;GO:0050849;GO:0050848;GO:1903579;GO:1903578;GO:0003012;GO:0045980;GO:0071840;GO:0051196;GO:0009968;GO:0009966;GO:0075732;GO:0075733;GO:0044419;GO:0042981;GO:0048518;GO:0048519;GO:0016202;GO:0006937;GO:0060255;GO:0009896;GO:0030049;GO:0030048;GO:0051195;GO:0045912;GO:0051701;GO:0051704;GO:0042325;GO:0051197;GO:0051194;GO:…	K21073	ACTN2_3	hsa05412	Arrhythmogenic right ventricular cardiomyopath	COG5069	Z:Cytoskeleton	PF00435.18;PF00307.28;PF08726.7;PF11971.5;PF13499.3;PF00036.29	Spectrin;CH;EFhand_Ca_insen;CAMSAP_CH;EF-hand_7;EF-hand_1	Spectrin repeat;Calponin homology;Ca2+ insensitive EF hand;CAMSAP CH domain;EF-hand domain pair;EF hand	cytoplasmic	1	14	103.2	High
Q9HCE1	Helicase MOV-10 OS=Homo sapiens OX=9606 GN=MOV10 PE=1 SV=2	0.66566	-0.587143	0.001573	down	yes	1.322	1.986	BP:regulation of primary metabolic process;BP:regulation of metabolic process;BP:signal transduction;BP:cell surface receptor signaling pathway;BP:organic cyclic compound biosynthetic process;BP:cellular component organization or biogenesis;BP:RNA biosynthetic process;BP:negative regulation of macromolecule metabolic process;BP:posttranscriptional regulation of gene expression;BP:regulation of ge…	GO:0080090;GO:0019222;GO:0007165;GO:0007166;GO:1901362;GO:0071840;GO:0032774;GO:0010605;GO:0010608;GO:0040029;GO:0016458;GO:0048519;GO:0097576;GO:0060255;GO:0090501;GO:2001141;GO:0035279;GO:1903706;GO:0035567;GO:0046483;GO:0016197;GO:0016192;GO:0016055;GO:0016441;GO:0019438;GO:0006379;GO:0009892;GO:0009890;GO:0010629;GO:0035556;GO:0050789;GO:1901576;GO:0044260;GO:0016043;GO:0065007;GO:1901360;GO:…	K18422	MOV10	------	------	COG1112	L:Replication, recombination and repair	PF13087.3;PF13086.3;PF13604.3;PF13245.3;PF04851.12	AAA_12;AAA_11;AAA_30;AAA_19;ResIII	AAA domain;AAA domain;AAA domain;Part of AAA domain;Type III restriction enzyme, res subunit	cytoplasmic	2	2	113.6	High
P02675	Fibrinogen beta chain OS=Homo sapiens OX=9606 GN=FGB PE=1 SV=2	0.68612	-0.543467	0.04852	down	yes	1.305	1.902	BP:negative regulation of apoptotic signaling pathway;BP:positive regulation of heterotypic cell-cell adhesion;BP:regulation of extrinsic apoptotic signaling pathway;BP:negative regulation of extrinsic apoptotic signaling pathway;BP:hemostasis;BP:regulation of secretion;BP:regulation of apoptotic signaling pathway;BP:regulation of transport;BP:negative regulation of response to stimulus;BP:blood …	GO:2001234;GO:0034116;GO:2001236;GO:2001237;GO:0007599;GO:0051046;GO:2001233;GO:0051049;GO:0048585;GO:0007596;GO:0048583;GO:0019229;GO:0007160;GO:0034109;GO:0034114;GO:0007165;GO:0003018;GO:0019220;GO:0045055;GO:0071840;GO:0044320;GO:0051716;GO:0009968;GO:0045785;GO:0009966;GO:0009967;GO:0051047;GO:0071310;GO:0032268;GO:0010720;GO:0048518;GO:0048519;GO:0016192;GO:0042325;GO:0031589;GO:0048584;GO:…	K03904	FGB	hsa04611;hsa04610	Platelet activation;Complement and coagulation cascades	------	------	PF00147.15;PF08702.7	Fibrinogen_C;Fib_alpha	Fibrinogen beta and gamma chains, C-terminal globular domain;Fibrinogen alpha/beta chain family	ER	2	3	55.9	High
P14174	Macrophage migration inhibitory factor OS=Homo sapiens OX=9606 GN=MIF PE=1 SV=4	0.527914	-0.921626	0.01701	down	yes	1.078	2.042	BP:regulation of secretion;BP:positive regulation of secretion;BP:regulation of transport;BP:small molecule metabolic process;BP:small molecule biosynthetic process;BP:regulation of phosphate metabolic process;BP:cellular response to stimulus;BP:regulation of apoptotic signaling pathway;BP:primary amino compound metabolic process;BP:primary amino compound biosynthetic process;BP:aminergic neurotr…	GO:0051046;GO:0051047;GO:0051049;GO:0044281;GO:0044283;GO:0019220;GO:0051716;GO:2001233;GO:1901160;GO:1901162;GO:0015842;GO:0060548;GO:0045859;GO:0046483;GO:0042325;GO:0042327;GO:0002702;GO:0090342;GO:0090344;GO:0009893;GO:0002700;GO:0050671;GO:0071902;GO:0051222;GO:0051223;GO:0072331;GO:0072330;GO:0051347;GO:0006887;GO:0002684;GO:0002685;GO:0002682;GO:0071840;GO:0002688;GO:0018130;GO:0070201;GO:…	K07253	MIF	hsa00350;hsa00360	Tyrosine metabolism;Phenylalanine metabolism	------	------	PF01187.15	MIF	Macrophage migration inhibitory factor	cytoplasmic	2	26	12.5	High
A0A0D9SF60	Plakophilin-4 OS=Homo sapiens OX=9606 GN=PKP4 PE=1 SV=1	0.624606	-0.678982	0.01782	down	yes	1.188	1.902	BP:cell-cell junction organization;BP:cellular component organization or biogenesis;BP:positive regulation of cell cycle;BP:positive regulation of molecular function;BP:positive regulation of biological process;BP:signaling;BP:single organism signaling;BP:positive regulation of cell division;BP:cellular component assembly;BP:positive regulation of cell cycle process;BP:positive regulation of GTPa…	GO:0045216;GO:0071840;GO:0045787;GO:0044093;GO:0048518;GO:0023052;GO:0044700;GO:0051781;GO:0022607;GO:0090068;GO:0043547;GO:0051345;GO:0016043;GO:0065007;GO:0043085;GO:0065009;GO:0050790;GO:0098609;GO:0050794;GO:0008150;GO:0051336;GO:0030155;GO:0007267;GO:0007043;GO:0043087;GO:0044699;GO:0010564;GO:0022610;GO:0009987;GO:0034329;GO:0016337;GO:0034330;GO:0051302;GO:0050789;GO:0032465;GO:0032467;GO:…	------	------	------	------	------	------	PF00514.20;PF13646.3	Arm;HEAT_2	Armadillo/beta-catenin-like repeat;HEAT repeats	nuclear	1	1	133.9	High
P08697	Alpha-2-antiplasmin OS=Homo sapiens OX=9606 GN=SERPINF2 PE=1 SV=3	0.610925	-0.710932	0.01198	down	yes	1.096	1.794	BP:regulation of MAPK cascade;BP:exocytosis;BP:regulation of phosphate metabolic process;BP:regulation of primary metabolic process;BP:regulation of metabolic process;BP:negative regulation of response to stimulus;BP:positive regulation of response to stimulus;BP:regulation of response to stimulus;BP:circulatory system process;BP:renal system process;BP:vascular process in circulatory system;BP:c…	GO:0043408;GO:0006887;GO:0019220;GO:0080090;GO:0019222;GO:0048585;GO:0048584;GO:0048583;GO:0003013;GO:0003014;GO:0003018;GO:0071840;GO:0071636;GO:0032231;GO:0032233;GO:0010604;GO:0043207;GO:0045785;GO:0009966;GO:0051496;GO:0051495;GO:0032101;GO:0051493;GO:0051492;GO:0001817;GO:0048514;GO:0009967;GO:0032940;GO:0044092;GO:0048518;GO:0048519;GO:0002526;GO:0042127;GO:0060255;GO:0032269;GO:0046330;GO:…	K03983	SERPINF2, AAP	hsa04610	Complement and coagulation cascades	COG4826	O:Posttranslational modification, protein turnover, chaperones	PF00079.17	Serpin	Serpin	extracellular	1	2	54.5	Medium
Q9UFH2	Dynein heavy chain 17, axonemal OS=Homo sapiens OX=9606 GN=DNAH17 PE=1 SV=3	0.758323	-0.399116	0.00976	down	yes	1.23	1.622	BP:microtubule-based movement;BP:cilium or flagellum-dependent cell motility;BP:movement of cell or subcellular component;BP:cilium-dependent cell motility;BP:single-organism process;BP:cilium movement;BP:cellular process;BP:single-organism cellular process;BP:locomotion;BP:microtubule-based process;BP:cell motility;BP:biological_process;CC:supramolecular fiber;CC:organelle;CC:intracellular organ…	GO:0007018;GO:0001539;GO:0006928;GO:0060285;GO:0044699;GO:0003341;GO:0009987;GO:0044763;GO:0040011;GO:0007017;GO:0048870;GO:0008150;GO:0099512;GO:0043226;GO:0043229;GO:0043228;GO:0005929;GO:0030286;GO:0005874;GO:0099513;GO:0005737;GO:0044446;GO:0044447;GO:0031514;GO:0005858;GO:0005875;GO:0044430;GO:1902494;GO:0042995;GO:0005930;GO:0043234;GO:0032991;GO:0043232;GO:0044463;GO:0044464;GO:0005575;GO:…	K10408	DNAH	hsa05016	Huntington's disease	COG5245	Z:Cytoskeleton	PF03028.12;PF12777.4;PF12775.4;PF12780.4;PF08385.9;PF12774.4;PF08393.10;PF12781.4;PF07728.11	Dynein_heavy;MT;AAA_7;AAA_8;DHC_N1;AAA_6;DHC_N2;AAA_9;AAA_5	Dynein heavy chain and region D6 of dynein motor;Microtubule-binding stalk of dynein motor;P-loop containing dynein motor region D3;P-loop containing dynein motor region D4;Dynein heavy chain, N-terminal region 1;Hydrolytic ATP binding site of dynein motor region D1;Dynein heavy chain, N-terminal region 2;ATP-binding dynein motor region D5;AAA domain	cytoplasmic	1	0	509	High
Q86VZ5	Phosphatidylcholine:ceramide cholinephosphotransferase 1 OS=Homo sapiens OX=9606 GN=SGMS1 PE=1 SV=3	0.516649	-0.952744	0.01704	down	yes	0.962	1.862	BP:negative regulation of apoptotic signaling pathway;BP:regulation of extrinsic apoptotic signaling pathway;BP:negative regulation of extrinsic apoptotic signaling pathway;BP:regulation of metabolic process;BP:regulation of apoptotic signaling pathway;BP:negative regulation of response to stimulus;BP:regulation of response to stimulus;BP:small molecule metabolic process;BP:small molecule biosynt…	GO:2001234;GO:2001236;GO:2001237;GO:0019222;GO:2001233;GO:0048585;GO:0048583;GO:0044281;GO:0044283;GO:0044707;GO:0051716;GO:0044711;GO:0010604;GO:0009968;GO:0009966;GO:0043067;GO:0009612;GO:0048518;GO:0048519;GO:0006665;GO:0006684;GO:0060255;GO:0060548;GO:1901564;GO:0010035;GO:0010033;GO:0009607;GO:0009605;GO:0044249;GO:0031667;GO:0033555;GO:0006672;GO:0009414;GO:0023051;GO:0032496;GO:0050789;GO:…	K04714	SGMS	hsa04071;hsa00600	Sphingolipid signaling pathway;Sphingolipid metabolism	------	------	PF14360.3;PF01569.18	PAP2_C;PAP2	PAP2 superfamily C-terminal;PAP2 superfamily	cytoplasmic	1	2	48.6	Medium
P61604	10 kDa heat shock protein, mitochondrial OS=Homo sapiens OX=9606 GN=HSPE1 PE=1 SV=2	0.681818	-0.552541	0.03301	down	yes	1.14	1.672	BP:regulation of primary metabolic process;BP:regulation of metabolic process;BP:response to unfolded protein;BP:positive regulation of macromolecule metabolic process;BP:cellular developmental process;BP:positive regulation of molecular function;BP:regulation of cysteine-type endopeptidase activity involved in apoptotic process;BP:positive regulation of cysteine-type endopeptidase activity invol…	GO:0080090;GO:0019222;GO:0006986;GO:0010604;GO:0048869;GO:0044093;GO:0043281;GO:0043280;GO:0060255;GO:0030162;GO:0010033;GO:0019538;GO:0006457;GO:0009893;GO:0006458;GO:0051345;GO:0006919;GO:0065007;GO:0043085;GO:0065009;GO:0050790;GO:0050794;GO:0006950;GO:0008150;GO:0008152;GO:0061077;GO:0051336;GO:0051604;GO:0050896;GO:0030154;GO:0042221;GO:0044699;GO:0010952;GO:0051084;GO:0051085;GO:0051246;GO:…	K04078	groES, HSPE1	------	------	COG0234	O:Posttranslational modification, protein turnover, chaperones	PF00166.18	Cpn10	Chaperonin 10 Kd subunit	cytoplasmic	6	81	10.9	High
Q9UBQ6	Exostosin-like 2 OS=Homo sapiens OX=9606 GN=EXTL2 PE=1 SV=1	0.801162	-0.319834	0.01594	down	yes	1.241	1.549	BP:regulation of metabolic process;BP:single-organism metabolic process;BP:signal transduction;BP:organic cyclic compound metabolic process;BP:regulation of primary metabolic process;BP:cellular response to stimulus;BP:single-organism biosynthetic process;BP:UDP-N-acetylgalactosamine metabolic process;BP:posttranscriptional regulation of gene expression;BP:protein metabolic process;BP:regulation …	GO:0019222;GO:0044710;GO:0007165;GO:1901360;GO:0080090;GO:0051716;GO:0044711;GO:0019276;GO:0010608;GO:0019538;GO:0060255;GO:0006446;GO:0030166;GO:0043436;GO:1901564;GO:0046483;GO:0030968;GO:0006040;GO:0006044;GO:0010468;GO:0033554;GO:1901071;GO:0044281;GO:0030203;GO:0030201;GO:0006807;GO:0050789;GO:1901576;GO:0015012;GO:0065007;GO:0044699;GO:0006139;GO:0009889;GO:0050794;GO:0006950;GO:0008150;GO:…	K02369	EXTL2	hsa00534	Glycosaminoglycan biosynthesis - heparan sulfate / heparin	------	------	PF09258.7	Glyco_transf_64	Glycosyl transferase family 64 domain	ER	1	6	37.4	Medium
Q9UHI7	Solute carrier family 23 member 1 OS=Homo sapiens OX=9606 GN=SLC23A1 PE=1 SV=3	0.443372	-1.17341	0.009458	down	yes	0.8495	1.916	BP:nuclear transport;BP:spliceosomal tri-snRNP complex assembly;BP:regulation of primary metabolic process;BP:regulation of metabolic process;BP:response to toxic substance;BP:cell development;BP:transepithelial transport;BP:female gamete generation;BP:anion transport;BP:small molecule metabolic process;BP:cellular component organization or biogenesis;BP:single-organism metabolic process;BP:negat…	GO:0051169;GO:0000244;GO:0080090;GO:0019222;GO:0009636;GO:0048468;GO:0070633;GO:0007292;GO:0006820;GO:0044281;GO:0071840;GO:0044710;GO:0010605;GO:0048869;GO:0043067;GO:0042981;GO:0048513;GO:0048518;GO:0048519;GO:0098662;GO:0042127;GO:0006767;GO:0006766;GO:0060255;GO:0015849;GO:0015711;GO:0007281;GO:0003006;GO:0070904;GO:2001141;GO:0043436;GO:0046483;GO:0044702;GO:0048477;GO:1903825;GO:0043068;GO:…	K14611	SLC23A1_2, SVCT1_2	------	------	COG2233	F:Nucleotide transport and metabolism	PF00860.17	Xan_ur_permease	Permease family	peroxisomal	1	2	64.8	Medium
O60831	PRA1 family protein 2 OS=Homo sapiens OX=9606 GN=PRAF2 PE=1 SV=1	0.644195	-0.634431	0.014	down	yes	1.032	1.602	BP:protein localization;BP:anion transport;BP:cellular macromolecule localization;BP:intracellular protein transmembrane transport;BP:macromolecule localization;BP:organic acid transport;BP:organic anion transport;BP:establishment of protein localization;BP:dicarboxylic acid transport;BP:establishment of protein localization to mitochondrion;BP:mitochondrial transport;BP:protein localization to m…	GO:0008104;GO:0006820;GO:0070727;GO:0065002;GO:0033036;GO:0015849;GO:0015711;GO:0045184;GO:0006835;GO:0072655;GO:0006839;GO:0070585;GO:0006886;GO:0006811;GO:0006626;GO:0006810;GO:0008150;GO:0051234;GO:0046907;GO:0072594;GO:0006865;GO:0030150;GO:0044699;GO:0071806;GO:0046942;GO:0017038;GO:0015807;GO:0015800;GO:0055085;GO:0044743;GO:0033365;GO:0015813;GO:0071705;GO:1990542;GO:0071702;GO:0009987;GO:…	K20392	PRAF2	------	------	------	------	PF03208.16	PRA1	PRA1 family protein	ER	3	22	19.2	High
G3V556	ATP synthase subunit ATP5MPL, mitochondrial OS=Homo sapiens OX=9606 GN=ATP5MPL PE=1 SV=1	0.801939	-0.318435	0.01033	down	yes	1.158	1.444	CC:intracellular organelle part;CC:organelle;CC:cellular_component;CC:cell part;CC:intracellular organelle;CC:mitochondrion;CC:intracellular membrane-bounded organelle;CC:nucleoplasm;CC:cytoplasmic part;CC:nuclear part;CC:intracellular part;CC:membrane-bounded organelle;CC:organelle part;MF:organic cyclic compound binding;MF:RNA binding;MF:nucleic acid binding;MF:molecular_function;MF:heterocycli…	GO:0044446;GO:0043226;GO:0005575;GO:0044464;GO:0043229;GO:0005739;GO:0043231;GO:0005654;GO:0044444;GO:0044428;GO:0044424;GO:0043227;GO:0044422;GO:0097159;GO:0003723;GO:0003676;GO:0003674;GO:1901363;GO:0005488	------	------	------	------	------	------	PF08039.8	Mit_proteolip	Mitochondrial proteolipid	cytoplasmic	1	7	11.3	Medium
Q8N5I2	Arrestin domain-containing protein 1 OS=Homo sapiens OX=9606 GN=ARRDC1 PE=1 SV=1	0.658131	-0.603554	0.01158	down	yes	1.028	1.562	BP:protein localization;BP:negative regulation of response to stimulus;BP:regulation of response to stimulus;BP:signal transduction;BP:signal transduction by protein phosphorylation;BP:cellular response to stimulus;BP:negative regulation of signal transduction;BP:regulation of signal transduction;BP:protein modification by small protein conjugation or removal;BP:protein modification by small prot…	GO:0008104;GO:0048585;GO:0048583;GO:0007165;GO:0023014;GO:0051716;GO:0009968;GO:0009966;GO:0070647;GO:0032446;GO:0048519;GO:0033036;GO:0045184;GO:0019538;GO:0000165;GO:0016567;GO:0033554;GO:0035556;GO:0050789;GO:0044267;GO:1901575;GO:0044265;GO:0044260;GO:0065007;GO:0006810;GO:0044710;GO:0050794;GO:0043412;GO:0036211;GO:0008150;GO:0008152;GO:0051234;GO:0051603;GO:0050896;GO:0006950;GO:0006511;GO:…	------	------	------	------	------	------	PF02752.19;PF00339.26	Arrestin_C;Arrestin_N	Arrestin;Arrestin	cytoplasmic	1	1	46	Medium
P62304	Small nuclear ribonucleoprotein E OS=Homo sapiens OX=9606 GN=SNRPE PE=1 SV=1	0.65493	-0.610588	0.03017	down	yes	1.023	1.562	BP:nuclear transport;BP:spliceosomal complex assembly;BP:organic cyclic compound biosynthetic process;BP:cellular component organization or biogenesis;BP:macromolecular complex assembly;BP:heterocycle metabolic process;BP:single-multicellular organism process;BP:mRNA splicing, via spliceosome;BP:aromatic compound biosynthetic process;BP:cellular component assembly;BP:nitrogen compound metabolic p…	GO:0051169;GO:0000245;GO:1901362;GO:0071840;GO:0065003;GO:0046483;GO:0044707;GO:0000398;GO:0019438;GO:0022607;GO:0006807;GO:1901576;GO:0000387;GO:0044260;GO:0016043;GO:1901360;GO:0006369;GO:0018130;GO:0006810;GO:0008150;GO:0008152;GO:0034654;GO:0051234;GO:0042303;GO:0016070;GO:0016071;GO:0044271;GO:0046907;GO:0000377;GO:0006353;GO:0032774;GO:0008334;GO:0044249;GO:0034641;GO:0044699;GO:0006139;GO:…	K11097	SNRPE, SME	hsa03040	Spliceosome	COG1958	K:Transcription	PF01423.19	LSM	LSM domain	mitochondrial	4	65	10.8	High
P58557	Endoribonuclease YbeY OS=Homo sapiens OX=9606 GN=YBEY PE=1 SV=2	0.616708	-0.69734	0.02081	down	yes	0.9855	1.598	BP:nucleic acid metabolic process;BP:nucleic acid phosphodiester bond hydrolysis;BP:nitrogen compound metabolic process;BP:ncRNA metabolic process;BP:ncRNA processing;BP:cellular macromolecule metabolic process;BP:organic substance metabolic process;BP:organic cyclic compound metabolic process;BP:proteolysis;BP:rRNA processing;BP:nucleobase-containing compound metabolic process;BP:cellular proces…	GO:0090304;GO:0090305;GO:0006807;GO:0034660;GO:0034470;GO:0044260;GO:0071704;GO:1901360;GO:0006508;GO:0006364;GO:0006139;GO:0009987;GO:0006725;GO:0008150;GO:0008152;GO:0046483;GO:0016070;GO:0044238;GO:0016072;GO:0034641;GO:0044237;GO:0043170;GO:0019538;GO:0006396;GO:0043229;GO:0043227;GO:0043226;GO:0044446;GO:0005634;GO:0005739;GO:0005654;GO:0043231;GO:0044464;GO:0005575;GO:0044444;GO:0044428;GO:…	------	------	------	------	COG0319	R:General function prediction only	PF02130.14	UPF0054	Uncharacterized protein family UPF0054	mitochondrial	2	11	19.3	High
Q969M3	Protein YIPF5 OS=Homo sapiens OX=9606 GN=YIPF5 PE=1 SV=1	0.688278	-0.538937	0.02962	down	yes	1.051	1.527	BP:protein localization;BP:regulation of transport;BP:regulation of intracellular transport;BP:cellular component organization or biogenesis;BP:macromolecule localization;BP:establishment of protein localization;BP:vesicle-mediated transport;BP:single organism reproductive process;BP:response to external stimulus;BP:cellular component assembly;BP:cellular component organization;BP:biological regu…	GO:0008104;GO:0051049;GO:0032386;GO:0071840;GO:0033036;GO:0045184;GO:0016192;GO:0044702;GO:0009605;GO:0022607;GO:0016043;GO:0065007;GO:0007416;GO:1903649;GO:0006810;GO:0050794;GO:0008150;GO:0051234;GO:0051606;GO:0050896;GO:0050962;GO:0050808;GO:0009314;GO:0009416;GO:0044699;GO:0060628;GO:0048609;GO:0009987;GO:0060627;GO:0032879;GO:0060341;GO:0050906;GO:0050908;GO:0007276;GO:0050789;GO:0071702;GO:…	K20363	YIP1, YIPF5	------	------	COG5080	U:Intracellular trafficking, secretion, and vesicular transport	PF04893.14	Yip1	Yip1 domain	cytoplasmic	2	8	28	High
O75340	Programmed cell death protein 6 OS=Homo sapiens OX=9606 GN=PDCD6 PE=1 SV=1	0.756267	-0.403032	0.04367	down	yes	1.086	1.436	BP:protein localization;BP:regulation of metabolic process;BP:cellular response to heat;BP:vesicle coating;BP:negative regulation of protein kinase B signaling;BP:signal transduction;BP:cell surface receptor signaling pathway;BP:enzyme linked receptor protein signaling pathway;BP:transmembrane receptor protein tyrosine kinase signaling pathway;BP:cellular component morphogenesis;BP:regulation of …	GO:0008104;GO:0019222;GO:0034605;GO:0006901;GO:0051898;GO:0007165;GO:0007166;GO:0007167;GO:0007169;GO:0032989;GO:0051896;GO:0071840;GO:0080090;GO:0014032;GO:0051716;GO:0014031;GO:0048864;GO:0010604;GO:0009968;GO:0009966;GO:0048869;GO:0044093;GO:0048518;GO:0048519;GO:0048585;GO:0042127;GO:0010634;GO:0060255;GO:0048583;GO:0045184;GO:0042221;GO:0030162;GO:0010038;GO:0010035;GO:0016192;GO:0010632;GO:…	------	------	------	------	------	------	PF00036.29;PF13499.3;PF13405.3;PF13833.3;PF13202.3	EF-hand_1;EF-hand_7;EF-hand_6;EF-hand_8;EF-hand_5	EF hand;EF-hand domain pair;EF-hand domain;EF-hand domain pair;EF hand	cytoplasmic	7	50	21.9	High
K7EMV4	Transcription elongation factor 1 homolog OS=Homo sapiens OX=9606 GN=ELOF1 PE=1 SV=1	0.716917	-0.480122	0.009436	down	yes	1.051	1.466	BP:regulation of primary metabolic process;BP:regulation of metabolic process;BP:signal transduction;BP:cell surface receptor signaling pathway;BP:organic cyclic compound biosynthetic process;BP:organic cyclic compound metabolic process;BP:regulation of macromolecule metabolic process;BP:regulation of RNA biosynthetic process;BP:heterocycle metabolic process;BP:aromatic compound biosynthetic proc…	GO:0080090;GO:0019222;GO:0007165;GO:0007166;GO:1901362;GO:1901360;GO:0060255;GO:2001141;GO:0046483;GO:0019438;GO:0006807;GO:0050789;GO:0097659;GO:1901576;GO:0044260;GO:0065007;GO:0007186;GO:0018130;GO:0009889;GO:0050794;GO:0008150;GO:0008152;GO:0034654;GO:0016070;GO:0044271;GO:0006355;GO:0010556;GO:0006351;GO:0032774;GO:0044249;GO:0034641;GO:0034645;GO:0006139;GO:0006725;GO:1903506;GO:0051252;GO:…	------	------	------	------	COG4888	R:General function prediction only	PF05129.10	Elf1	Transcription elongation factor Elf1 like	cytoplasmic	1	15	13.3	High
P03891	NADH-ubiquinone oxidoreductase chain 2 OS=Homo sapiens OX=9606 GN=MT-ND2 PE=1 SV=2	0.682731	-0.550611	0.04273	down	yes	1.02	1.494	BP:cellular component assembly;BP:reactive oxygen species metabolic process;BP:protein complex biogenesis;BP:macromolecular complex subunit organization;BP:cellular macromolecular complex assembly;BP:generation of precursor metabolites and energy;BP:cellular component organization or biogenesis;BP:single-organism metabolic process;BP:protein complex subunit organization;BP:mitochondrial respirato…	GO:0022607;GO:0072593;GO:0070271;GO:0043933;GO:0034622;GO:0006091;GO:0071840;GO:0044710;GO:0071822;GO:0032981;GO:0010257;GO:0016043;GO:0065003;GO:0022900;GO:0022904;GO:0033108;GO:0009987;GO:0006461;GO:0008150;GO:0008152;GO:0043623;GO:0055114;GO:0044699;GO:0097031;GO:0044763;GO:0044237;GO:0006120;GO:0044085;GO:0019866;GO:1990204;GO:0031224;GO:0005739;GO:0098800;GO:0043227;GO:0044446;GO:0005743;GO:…	K03879	ND2	hsa04723;hsa05012;hsa00190	Retrograde endocannabinoid signaling;Parkinson's disease;Oxidative phosphorylation	COG1009;COG1007	C:Energy production and conversion;	PF00361.17;PF06444.8	Proton_antipo_M;NADH_dehy_S2_C	Proton-conducting membrane transporter;NADH dehydrogenase subunit 2 C-terminus	ER	1	3	38.9	High
O95445	Apolipoprotein M OS=Homo sapiens OX=9606 GN=APOM PE=1 SV=2	0.612789	-0.706537	0.002722	down	yes	0.9535	1.556	BP:negative regulation of lipoprotein oxidation;BP:regulation of lipoprotein oxidation;BP:negative regulation of plasma lipoprotein particle oxidation;BP:regulation of plasma lipoprotein particle oxidation;BP:regulation of metabolic process;BP:anion transport;BP:inorganic ion homeostasis;BP:cellular lipid metabolic process;BP:cellular component organization or biogenesis;BP:regulation of primary …	GO:0034443;GO:0034442;GO:0034445;GO:0034444;GO:0019222;GO:0006820;GO:0098771;GO:0044255;GO:0071840;GO:0080090;GO:0044710;GO:0010605;GO:0071704;GO:0098869;GO:0016101;GO:0048519;GO:0019725;GO:0034367;GO:0060255;GO:0034369;GO:1990748;GO:0043691;GO:0010033;GO:0044707;GO:0034284;GO:0019538;GO:0048878;GO:0009792;GO:0034377;GO:0034375;GO:0022607;GO:0009892;GO:0015918;GO:0015850;GO:0014070;GO:0098754;GO:…	------	------	------	------	------	------	PF11032.5	ApoM	ApoM domain	lysosomal	2	7	21.2	High
P51571	Translocon-associated protein subunit delta OS=Homo sapiens OX=9606 GN=SSR4 PE=1 SV=1	0.605701	-0.723321	0.02942	down	yes	0.9455	1.561	BP:glycolytic process from galactose;BP:glycolytic process through glucose-1-phosphate;BP:glycolytic process through glucose-6-phosphate;BP:small molecule metabolic process;BP:small molecule catabolic process;BP:ribonucleoside monophosphate metabolic process;BP:organic cyclic compound metabolic process;BP:single-organism catabolic process;BP:single-organism metabolic process;BP:organic substance …	GO:0061623;GO:0061622;GO:0061620;GO:0044281;GO:0044282;GO:0009161;GO:1901360;GO:0044712;GO:0044710;GO:0071704;GO:0009199;GO:0006733;GO:0009205;GO:0046034;GO:0046031;GO:0032787;GO:0043436;GO:1901564;GO:0046128;GO:0009179;GO:0046483;GO:0009167;GO:0016052;GO:0006163;GO:0006165;GO:0019637;GO:0019320;GO:0009141;GO:0009144;GO:0006807;GO:0046496;GO:1901575;GO:0051186;GO:0044262;GO:0006059;GO:0019400;GO:…	K04571	SSR4	hsa04141	Protein processing in endoplasmic reticulum	------	------	PF05404.9	TRAP-delta	Translocon-associated protein, delta subunit precursor	ER	4	31	19	High
P84098	60S ribosomal protein L19 OS=Homo sapiens OX=9606 GN=RPL19 PE=1 SV=1	0.733057	-0.448003	0.03094	down	yes	1.06	1.446	BP:protein localization;BP:membrane organization;BP:signal transduction;BP:cell chemotaxis;BP:positive regulation of establishment of protein localization to plasma membrane;BP:organic cyclic compound biosynthetic process;BP:cellular component organization or biogenesis;BP:organic cyclic compound catabolic process;BP:taxis;BP:cellular macromolecule localization;BP:peptide biosynthetic process;BP:…	GO:0008104;GO:0061024;GO:0007165;GO:0060326;GO:0090004;GO:1901362;GO:0071840;GO:1901361;GO:0042330;GO:0070727;GO:0043043;GO:0048513;GO:0044093;GO:0048518;GO:0033036;GO:0006364;GO:0034470;GO:0006935;GO:0031100;GO:0007264;GO:0006605;GO:0045184;GO:0072657;GO:0050794;GO:0046483;GO:1903827;GO:1901564;GO:1901566;GO:0048870;GO:0019538;GO:0019438;GO:0006613;GO:0019083;GO:0006614;GO:0006928;GO:0006807;GO:…	K02885	RP-L19e, RPL19	hsa03010	Ribosome	COG2147	J:Translation, ribosomal structure and biogenesis	PF01280.17	Ribosomal_L19e	Ribosomal protein L19e	cytoplasmic	9	38	23.5	High
P00403	Cytochrome c oxidase subunit 2 OS=Homo sapiens OX=9606 GN=MT-CO2 PE=1 SV=1	0.594904	-0.74927	0.03566	down	yes	0.934	1.57	BP:regulation of phosphate metabolic process;BP:regulation of primary metabolic process;BP:regulation of metabolic process;BP:lactation;BP:regulation of ATP metabolic process;BP:small molecule metabolic process;BP:ribonucleoside monophosphate metabolic process;BP:positive regulation of nucleotide metabolic process;BP:organic cyclic compound metabolic process;BP:single-organism metabolic process;B…	GO:0019220;GO:0080090;GO:0019222;GO:0007595;GO:1903578;GO:0044281;GO:0009161;GO:0045981;GO:1901360;GO:0044710;GO:0010310;GO:0071704;GO:0010726;GO:0009199;GO:0022900;GO:0022904;GO:0048518;GO:0010728;GO:0098662;GO:0009205;GO:0046034;GO:1901564;GO:0046128;GO:0055114;GO:0046483;GO:0044707;GO:0009167;GO:1900373;GO:1900371;GO:0006163;GO:0010939;GO:0009893;GO:0009891;GO:0006123;GO:0009144;GO:0032941;GO:…	K02261	COX2	hsa00190;hsa04260;hsa04932;hsa05016;hsa05010;hsa05012	Oxidative phosphorylation;Cardiac muscle contraction;Non-alcoholic fatty liver diseas;Huntington's disease;Alzheimer's disease;Parkinson's disease	COG1622	C:Energy production and conversion	PF00116.17;PF02790.12	COX2;COX2_TM	Cytochrome C oxidase subunit II, periplasmic domain;Cytochrome C oxidase subunit II, transmembrane domain	peroxisomal	6	31	25.5	High
D6RJB7	Ankyrin repeat domain-containing protein 31 OS=Homo sapiens OX=9606 GN=ANKRD31 PE=4 SV=2	0.717541	-0.478866	0.03141	down	yes	1.039	1.448	------	------	------	------	------	------	------	------	PF12796.4;PF13857.3;PF13606.3;PF00023.27;PF13637.3	Ank_2;Ank_5;Ank_3;Ank;Ank_4	Ankyrin repeats;Ankyrin repeats;Ankyrin repeat;Ankyrin repeat;Ankyrin repeats	nuclear	1	0	217.4	High
P02042	Hemoglobin subunit delta OS=Homo sapiens OX=9606 GN=HBD PE=1 SV=2	0.54386	-0.878694	0.008415	down	yes	0.868	1.596	BP:hemostasis;BP:blood coagulation;BP:single-organism process;BP:biological regulation;BP:regulation of biological quality;BP:oxygen transport;BP:multicellular organismal process;BP:regulation of body fluid levels;BP:transport;BP:single-organism transport;BP:coagulation;BP:biological_process;BP:establishment of localization;BP:localization;BP:single-organism localization;BP:single-multicellular o…	GO:0007599;GO:0007596;GO:0044699;GO:0065007;GO:0065008;GO:0015671;GO:0032501;GO:0050878;GO:0006810;GO:0044765;GO:0050817;GO:0008150;GO:0051234;GO:0051179;GO:1902578;GO:0044707;GO:0015669;GO:0072562;GO:0005833;GO:0043234;GO:0032991;GO:0005829;GO:0044464;GO:0005575;GO:0044444;GO:0044445;GO:0044424;GO:0044421;GO:0005344;GO:0046872;GO:0003674;GO:0005488;GO:0043167;GO:1901363;GO:0043169;GO:0020037;GO:…	K16151	HBD	------	------	COG1018	C:Energy production and conversion	PF00042.19	Globin	Globin	cytoplasmic	2	13	16	High
Q15257	Serine/threonine-protein phosphatase 2A activator OS=Homo sapiens OX=9606 GN=PTPA PE=1 SV=3	0.797619	-0.326228	0.02985	down	yes	1.072	1.344	BP:regulation of microtubule polymerization or depolymerization;BP:negative regulation of microtubule polymerization or depolymerization;BP:regulation of phosphate metabolic process;BP:regulation of primary metabolic process;BP:regulation of metabolic process;BP:protein dephosphorylation;BP:negative regulation of response to stimulus;BP:regulation of response to stimulus;BP:regulation of protein …	GO:0031110;GO:0031111;GO:0019220;GO:0080090;GO:0019222;GO:0006470;GO:0048585;GO:0048583;GO:0034047;GO:0007165;GO:0007166;GO:0007167;GO:0007169;GO:0010605;GO:0010604;GO:0009968;GO:0051494;GO:0051493;GO:0018193;GO:0044093;GO:0044092;GO:0048518;GO:0048519;GO:0042325;GO:0060255;GO:0007051;GO:1901880;GO:0051129;GO:0042326;GO:0018208;GO:0044707;GO:0010633;GO:0019538;GO:0022402;GO:0031114;GO:0070507;GO:…	K17605	PPP2R4, PTPA	hsa04931	Insulin resistance	COG5057	T:Signal transduction mechanisms	PF03095.12	PTPA	Phosphotyrosyl phosphate activator	cytoplasmic	3	15	40.6	High
Q9UKR5	Probable ergosterol biosynthetic protein 28 OS=Homo sapiens OX=9606 GN=ERG28 PE=1 SV=1	0.740015	-0.434375	0.04808	down	yes	1.019	1.377	BP:cellular biosynthetic process;BP:small molecule metabolic process;BP:small molecule biosynthetic process;BP:organic cyclic compound biosynthetic process;BP:single-organism process;BP:organic substance biosynthetic process;BP:single-organism metabolic process;BP:single-organism biosynthetic process;BP:organic substance metabolic process;BP:organic cyclic compound metabolic process;BP:sterol bio…	GO:0044249;GO:0044281;GO:0044283;GO:1901362;GO:0044699;GO:1901576;GO:0044710;GO:0044711;GO:0071704;GO:1901360;GO:0016126;GO:0016125;GO:0006629;GO:0046165;GO:0009987;GO:0016128;GO:0016129;GO:1902653;GO:1902652;GO:0009058;GO:0008150;GO:0008152;GO:0008204;GO:0044255;GO:0008202;GO:0008610;GO:0044107;GO:0044238;GO:0044108;GO:0044237;GO:0006066;GO:0044763;GO:0097384;GO:0006694;GO:0006696;GO:1901617;GO:…	------	------	------	------	------	------	PF03694.10	Erg28	Erg28 like protein	plasma membrane	1	6	15.9	High
P56381	ATP synthase subunit epsilon, mitochondrial OS=Homo sapiens OX=9606 GN=ATP5F1E PE=1 SV=2	0.667489	-0.583183	0.01026	down	yes	0.9465	1.418	BP:purine ribonucleoside monophosphate metabolic process;BP:nucleotide biosynthetic process;BP:small molecule metabolic process;BP:ribonucleoside monophosphate metabolic process;BP:organic cyclic compound biosynthetic process;BP:purine nucleoside biosynthetic process;BP:purine ribonucleoside monophosphate biosynthetic process;BP:mitochondrion organization;BP:single-organism metabolic process;BP:s…	GO:0009167;GO:0009165;GO:0044281;GO:0009161;GO:1901362;GO:0042451;GO:0009168;GO:0007005;GO:0044710;GO:0044711;GO:0071840;GO:1990542;GO:0009199;GO:0098662;GO:0009206;GO:0009205;GO:0009201;GO:0046034;GO:0098660;GO:0007006;GO:0006839;GO:0046129;GO:0046128;GO:0042455;GO:0046483;GO:1901564;GO:1901566;GO:0061024;GO:0006163;GO:0006164;GO:0019637;GO:0019438;GO:0009163;GO:0009141;GO:0009142;GO:0009144;GO:…	K02135	ATPeF1E, ATP5E, ATP15	hsa05016;hsa05010;hsa05012;hsa00190	Huntington's disease;Alzheimer's disease;Parkinson's disease;Oxidative phosphorylation	------	------	PF04627.10	ATP-synt_Eps	Mitochondrial ATP synthase epsilon chain	mitochondrial	2	29	5.8	High
Q9UPR3	Protein SMG5 OS=Homo sapiens OX=9606 GN=SMG5 PE=1 SV=3	1.28558	0.362415	0.03081	up	yes	1.328	1.033	BP:nuclear transport;BP:nuclear export;BP:regulation of phosphate metabolic process;BP:regulation of primary metabolic process;BP:regulation of metabolic process;BP:negative regulation of response to stimulus;BP:regulation of response to stimulus;BP:regulation of homeostatic process;BP:signal transduction;BP:organic cyclic compound metabolic process;BP:organic cyclic compound catabolic process;BP…	GO:0051169;GO:0051168;GO:0019220;GO:0080090;GO:0019222;GO:0048585;GO:0048583;GO:0032844;GO:0007165;GO:1901360;GO:1901361;GO:0071705;GO:0044710;GO:0009968;GO:0009966;GO:0010608;GO:0002263;GO:0007214;GO:0044093;GO:0002682;GO:0006913;GO:0030154;GO:0051052;GO:0060255;GO:0019439;GO:0046649;GO:0001923;GO:0050804;GO:0046483;GO:0042325;GO:0006275;GO:0006405;GO:0002376;GO:0023051;GO:0045321;GO:0006807;GO:…	K11125	SMG5, EST1B	hsa03015	mRNA surveillance pathway	------	------	PF10373.6;PF10374.6;PF13638.3	EST1_DNA_bind;EST1;PIN_4	Est1 DNA/RNA binding domain;Telomerase activating protein Est1;PIN domain	nuclear	1	2	113.9	Medium
A0A087WZV0	Inositol hexakisphosphate and diphosphoinositol-pentakisphosphate kinase OS=Homo sapiens OX=9606 GN=PPIP5K2 PE=1 SV=1	1.36004	0.443649	0.02795	up	yes	1.358	0.9985	BP:small molecule metabolic process;BP:organic cyclic compound biosynthetic process;BP:cellular component organization or biogenesis;BP:macromolecular complex assembly;BP:single-organism metabolic process;BP:heterocycle metabolic process;BP:inositol phosphate metabolic process;BP:organophosphate metabolic process;BP:aromatic compound biosynthetic process;BP:cellular component assembly;BP:nitrogen…	GO:0044281;GO:1901362;GO:0071840;GO:0065003;GO:0044710;GO:0046483;GO:0043647;GO:0019637;GO:0019438;GO:0022607;GO:0006807;GO:1901576;GO:0044262;GO:0044260;GO:0016043;GO:0007049;GO:0018130;GO:0006461;GO:0006139;GO:0012501;GO:0008150;GO:0008152;GO:0034654;GO:0016070;GO:0044271;GO:0006351;GO:0006020;GO:1901615;GO:0032774;GO:0016311;GO:0016310;GO:0044249;GO:0034641;GO:0034645;GO:0044699;GO:0009987;GO:…	------	------	------	------	------	------	PF00328.19	His_Phos_2	Histidine phosphatase superfamily	cytoplasmic	2	4	144.3	High
Q9NP61	ADP-ribosylation factor GTPase-activating protein 3 OS=Homo sapiens OX=9606 GN=ARFGAP3 PE=1 SV=1	0.779456	-0.35946	0.04852	down	yes	1.032	1.324	BP:positive regulation of GTPase activity;BP:protein localization;BP:regulation of catalytic activity;BP:single-organism process;BP:central nervous system development;BP:positive regulation of hydrolase activity;BP:regulation of GTPase activity;BP:biological regulation;BP:organic substance transport;BP:regulation of molecular function;BP:macromolecule localization;BP:developmental process;BP:posi…	GO:0043547;GO:0008104;GO:0050790;GO:0044699;GO:0007417;GO:0051345;GO:0043087;GO:0065007;GO:0071702;GO:0065009;GO:0033036;GO:0032502;GO:0043085;GO:0009987;GO:0044093;GO:0048193;GO:0009306;GO:0006810;GO:0048731;GO:0045184;GO:0015031;GO:0044765;GO:0008150;GO:0051649;GO:0006888;GO:0051234;GO:0051179;GO:1902578;GO:0016192;GO:0051336;GO:0046903;GO:0006890;GO:0046907;GO:0048856;GO:0032940;GO:0044763;GO:…	K12493	ARFGAP2_3	hsa04144	Endocytosis	COG5347	U:Intracellular trafficking, secretion, and vesicular transport	PF01412.15	ArfGap	Putative GTPase activating protein for Arf	cytoplasmic	2	5	56.9	High
P69905	Hemoglobin subunit alpha OS=Homo sapiens OX=9606 GN=HBA1 PE=1 SV=2	0.764307	-0.387775	0.04546	down	yes	1.015	1.328	BP:anion transport;BP:small molecule metabolic process;BP:small molecule catabolic process;BP:cellular component organization or biogenesis;BP:single-organism catabolic process;BP:macromolecular complex assembly;BP:single-organism metabolic process;BP:cellular oxidant detoxification;BP:positive regulation of biological process;BP:dicarboxylic acid catabolic process;BP:protein heterooligomerizatio…	GO:0006820;GO:0044281;GO:0044282;GO:0071840;GO:0044712;GO:0065003;GO:0044710;GO:0098869;GO:0048518;GO:0043649;GO:0051291;GO:0015711;GO:1990748;GO:0043436;GO:0010035;GO:0043648;GO:0016192;GO:0016054;GO:0015701;GO:0022607;GO:0000302;GO:0042744;GO:0042743;GO:0098754;GO:0050789;GO:1901575;GO:0065007;GO:0006461;GO:0006811;GO:0006810;GO:0050794;GO:0006950;GO:0008150;GO:0008152;GO:0051234;GO:0006897;GO:…	K13822	HBA	hsa05143;hsa05144	African trypanosomiasis;Malaria	COG1018	C:Energy production and conversion	PF00042.19	Globin	Globin	cytoplasmic	3	22	15.2	High
Q86WC4	Osteopetrosis-associated transmembrane protein 1 OS=Homo sapiens OX=9606 GN=OSTM1 PE=1 SV=1	0.685612	-0.544537	0.003423	down	yes	0.953	1.39	BP:cell differentiation;BP:localization;BP:single-organism process;BP:cellular developmental process;BP:myeloid leukocyte differentiation;BP:leukocyte differentiation;BP:developmental process;BP:transport;BP:ion transport;BP:osteoclast differentiation;BP:single-organism developmental process;BP:ion transmembrane transport;BP:single-organism transport;BP:single-organism cellular process;BP:establi…	GO:0030154;GO:0051179;GO:0044699;GO:0048869;GO:0002573;GO:0002521;GO:0032502;GO:0006810;GO:0006811;GO:0030316;GO:0044767;GO:0034220;GO:0044765;GO:0044763;GO:0051234;GO:0055085;GO:1902578;GO:0030099;GO:0008150;GO:0009987;GO:0016021;GO:0000323;GO:0043229;GO:0005774;GO:0043227;GO:0043226;GO:0005764;GO:0031090;GO:0005773;GO:0098805;GO:0016020;GO:0044437;GO:0098588;GO:0044446;GO:0044425;GO:0043231;GO:…	------	------	------	------	------	------	PF09777.6	OSTMP1	Osteopetrosis-associated transmembrane protein 1 precursor	extracellular	2	6	37.2	High
Q9H488	GDP-fucose protein O-fucosyltransferase 1 OS=Homo sapiens OX=9606 GN=POFUT1 PE=1 SV=1	0.734815	-0.444547	0.04525	down	yes	0.992	1.35	BP:regulation of metabolic process;BP:regulation of response to stimulus;BP:signal transduction;BP:cell surface receptor signaling pathway;BP:regulation of primary metabolic process;BP:single-organism metabolic process;BP:Notch signaling pathway;BP:regulation of signal transduction;BP:animal organ development;BP:regulation of macromolecule metabolic process;BP:regionalization;BP:regulation of RNA…	GO:0019222;GO:0048583;GO:0007165;GO:0007166;GO:0080090;GO:0044710;GO:0007219;GO:0009966;GO:0048513;GO:0060255;GO:0003002;GO:2001141;GO:0001756;GO:0044707;GO:0019538;GO:0044281;GO:0050789;GO:0036065;GO:0044267;GO:0036066;GO:0044260;GO:0065007;GO:0048646;GO:0016266;GO:0019318;GO:0009889;GO:0050794;GO:0043412;GO:0043413;GO:0008150;GO:0008152;GO:0044723;GO:0009952;GO:0006355;GO:0010556;GO:0023051;GO:…	K03691	POFUT	hsa00514	Other types of O-glycan biosynthesis	------	------	PF10250.6	O-FucT	GDP-fucose protein O-fucosyltransferase	ER	5	24	43.9	High
Q9H361	Polyadenylate-binding protein 3 OS=Homo sapiens OX=9606 GN=PABPC3 PE=1 SV=2	1.35347	0.436668	0.01303	up	yes	1.344	0.993	BP:nucleic acid metabolic process;BP:cellular nitrogen compound metabolic process;BP:nitrogen compound metabolic process;BP:organic cyclic compound metabolic process;BP:nucleobase-containing compound metabolic process;BP:cellular macromolecule metabolic process;BP:organic substance metabolic process;BP:mRNA metabolic process;BP:cellular process;BP:cellular aromatic compound metabolic process;BP:b…	GO:0090304;GO:0034641;GO:0006807;GO:1901360;GO:0006139;GO:0044260;GO:0071704;GO:0016071;GO:0009987;GO:0006725;GO:0008150;GO:0008152;GO:0046483;GO:0016070;GO:0044238;GO:0044237;GO:0043170;GO:0005829;GO:0043227;GO:0043226;GO:0005737;GO:0070062;GO:0016021;GO:0031224;GO:0031982;GO:1903561;GO:0043230;GO:0044464;GO:0005575;GO:0044444;GO:0044424;GO:0044425;GO:0044421;GO:0008143;GO:0003674;GO:0005488;GO:…	K13126	PABPC	hsa03015;hsa03013;hsa03018	mRNA surveillance pathway;RNA transport;RNA degradation	------	------	PF00076.19;PF00658.15	RRM_1;PABP	RNA recognition motif.;Poly-adenylate binding protein, unique domain	cytoplasmic	1	22	70	High
P22352	Glutathione peroxidase 3 OS=Homo sapiens OX=9606 GN=GPX3 PE=1 SV=2	0.524215	-0.93177	0.01691	down	yes	0.801	1.528	BP:cellular component assembly;BP:protein homotetramerization;BP:macromolecular complex subunit organization;BP:response to reactive oxygen species;BP:cellular catabolic process;BP:hydrogen peroxide catabolic process;BP:cellular component organization;BP:cellular response to chemical stimulus;BP:detoxification;BP:cellular component organization or biogenesis;BP:single-organism catabolic process;B…	GO:0022607;GO:0051289;GO:0043933;GO:0000302;GO:0044248;GO:0042744;GO:0016043;GO:0070887;GO:0098754;GO:0071840;GO:0044712;GO:0098869;GO:0044710;GO:0071822;GO:0006982;GO:0051260;GO:0051262;GO:0010033;GO:0065003;GO:0044699;GO:0033554;GO:1901700;GO:0009987;GO:0006461;GO:0051716;GO:0072593;GO:0006950;GO:0008150;GO:0008152;GO:0042221;GO:0034599;GO:0009056;GO:0006979;GO:0055114;GO:0051259;GO:0050896;GO:…	K00432	gpx	hsa00590;hsa00480;hsa04918	Arachidonic acid metabolism;Glutathione metabolism;Thyroid hormone synthesis	COG0386	O:Posttranslational modification, protein turnover, chaperones	PF00255.16	GSHPx	Glutathione peroxidase	lysosomal	1	5	25.5	High
Q96BR5	Cytochrome c oxidase assembly factor 7 OS=Homo sapiens OX=9606 GN=COA7 PE=1 SV=2	0.649928	-0.621648	0.0265	down	yes	0.906	1.394	BP:regulation of primary metabolic process;BP:regulation of metabolic process;BP:regulation of transport;BP:signal transduction;BP:organic substance metabolic process;BP:peptidyl-amino acid modification;BP:positive regulation of molecular function;BP:positive regulation of biological process;BP:regulation of cell proliferation;BP:positive regulation of transport;BP:regulation of macromolecule met…	GO:0080090;GO:0019222;GO:0051049;GO:0007165;GO:0071704;GO:0018193;GO:0044093;GO:0048518;GO:0042127;GO:0051050;GO:0060255;GO:2001141;GO:0018209;GO:0019538;GO:0032411;GO:0035556;GO:0050789;GO:0044267;GO:0044260;GO:0065007;GO:0065009;GO:0006810;GO:0006811;GO:0009889;GO:0050794;GO:0043412;GO:0036211;GO:0008150;GO:0008152;GO:0051234;GO:0050896;GO:0006950;GO:0006355;GO:0010556;GO:0016310;GO:0051128;GO:…	K18180	COA7, SELRC1, RESA1	------	------	COG0790	R:General function prediction only	PF08238.9	Sel1	Sel1 repeat	cytoplasmic	4	28	25.7	High
Q9Y2R0	Cytochrome c oxidase assembly factor 3 homolog, mitochondrial OS=Homo sapiens OX=9606 GN=COA3 PE=1 SV=1	0.674198	-0.568755	0.04614	down	yes	0.925	1.372	BP:positive regulation of mitochondrial translation;BP:regulation of primary metabolic process;BP:regulation of metabolic process;BP:cellular component organization or biogenesis;BP:positive regulation of macromolecule metabolic process;BP:posttranscriptional regulation of gene expression;BP:regulation of organelle organization;BP:positive regulation of biological process;BP:mitochondrial respira…	GO:0070131;GO:0080090;GO:0019222;GO:0071840;GO:0010604;GO:0010608;GO:0033043;GO:0048518;GO:0097034;GO:0060255;GO:0010638;GO:0022607;GO:0009893;GO:0009891;GO:0017004;GO:0010628;GO:0043170;GO:0050789;GO:1901576;GO:0044260;GO:0016043;GO:0065003;GO:0065007;GO:0044699;GO:0045727;GO:0051130;GO:0009889;GO:0050794;GO:0008150;GO:0008152;GO:0010556;GO:0022411;GO:0034250;GO:0033617;GO:0070271;GO:0051128;GO:…	K18175	CCDC56, COA3	------	------	------	------	PF09813.6	Coiled-coil_56	Coiled-coil domain-containing protein 56	cytoplasmic	3	27	11.7	High
Q9NQ29	Putative RNA-binding protein Luc7-like 1 OS=Homo sapiens OX=9606 GN=LUC7L PE=1 SV=1	0.742033	-0.430444	0.02215	down	yes	0.978	1.318	BP:regulation of response to stimulus;BP:cellular component organization or biogenesis;BP:leukocyte mediated cytotoxicity;BP:regulation of immune system process;BP:cell killing;BP:regulation of striated muscle tissue development;BP:lymphocyte activation;BP:immune system process;BP:mRNA splice site selection;BP:negative regulation of striated muscle tissue development;BP:cellular component assembl…	GO:0048583;GO:0071840;GO:0001909;GO:0002682;GO:0001906;GO:0016202;GO:0046649;GO:0002376;GO:0006376;GO:0045843;GO:0022607;GO:0045321;GO:0016043;GO:0065003;GO:0065007;GO:1901861;GO:1901862;GO:0050793;GO:0006952;GO:0006950;GO:0008150;GO:0051239;GO:0006955;GO:0050896;GO:0042267;GO:0001775;GO:0048635;GO:0048634;GO:0044699;GO:0051241;GO:0022618;GO:0002228;GO:0022610;GO:0009987;GO:0048519;GO:0051093;GO:…	------	------	------	------	COG5200	A:RNA processing and modification	PF03194.12	LUC7	LUC7 N_terminus	nuclear	3	23	43.7	High
Q8IXM3	39S ribosomal protein L41, mitochondrial OS=Homo sapiens OX=9606 GN=MRPL41 PE=1 SV=1	0.689757	-0.53584	0.03555	down	yes	0.936	1.357	BP:cellular component organization or biogenesis;BP:peptide biosynthetic process;BP:organonitrogen compound metabolic process;BP:protein metabolic process;BP:covalent chromatin modification;BP:cellular protein metabolic process;BP:cellular macromolecule metabolic process;BP:cellular component organization;BP:cell cycle;BP:programmed cell death;BP:biological_process;BP:metabolic process;BP:cellula…	GO:0071840;GO:0043043;GO:1901564;GO:0019538;GO:0016569;GO:0044267;GO:0044260;GO:0016043;GO:0007049;GO:0012501;GO:0008150;GO:0008152;GO:0044271;GO:0022411;GO:0006518;GO:0044249;GO:0034641;GO:0034645;GO:0043241;GO:1901566;GO:0044699;GO:0009987;GO:0043604;GO:0043603;GO:0043170;GO:0006807;GO:0043933;GO:0008219;GO:0032984;GO:0071822;GO:0006325;GO:0071704;GO:0070126;GO:0070125;GO:1901576;GO:0006915;GO:…	K17422	MRPL41	------	------	------	------	PF09809.6	MRP-L27	Mitochondrial ribosomal protein L27	cytoplasmic	3	42	15.4	High
Q8IZ21	Phosphatase and actin regulator 4 OS=Homo sapiens OX=9606 GN=PHACTR4 PE=1 SV=1	0.82035	-0.285689	0.02641	down	yes	1.032	1.258	BP:regulation of phosphate metabolic process;BP:regulation of primary metabolic process;BP:regulation of metabolic process;BP:regulation of homotypic cell-cell adhesion;BP:regulation of alpha-beta T cell differentiation;BP:regulation of extrathymic T cell differentiation;BP:regulation of alpha-beta T cell activation;BP:regulation of response to stimulus;BP:signal transduction;BP:regulation of sig…	GO:0019220;GO:0080090;GO:0019222;GO:0034110;GO:0046637;GO:0033082;GO:0046634;GO:0048583;GO:0007165;GO:0009966;GO:0061386;GO:1901362;GO:0071840;GO:0032774;GO:0051716;GO:0010605;GO:0010604;GO:0009968;GO:0048869;GO:0010033;GO:0032268;GO:0044093;GO:0044092;GO:0048518;GO:0065007;GO:0048585;GO:0040011;GO:1904627;GO:0060255;GO:0001667;GO:0006952;GO:0034645;GO:2001141;GO:0001755;GO:1903706;GO:0001843;GO:…	K17585	PHACTR4	------	------	------	------	PF02755.12	RPEL	RPEL repeat	cytoplasmic	3	8	78.2	High
Q6PI48	Aspartate--tRNA ligase, mitochondrial OS=Homo sapiens OX=9606 GN=DARS2 PE=1 SV=1	0.803473	-0.315679	0.02568	down	yes	1.018	1.267	BP:small molecule metabolic process;BP:cellular component organization or biogenesis;BP:single-organism metabolic process;BP:peptide biosynthetic process;BP:oxoacid metabolic process;BP:heterocycle metabolic process;BP:organonitrogen compound metabolic process;BP:organonitrogen compound biosynthetic process;BP:protein metabolic process;BP:amino acid activation;BP:tRNA aminoacylation;BP:cellular c…	GO:0044281;GO:0071840;GO:0044710;GO:0043043;GO:0043436;GO:0046483;GO:1901564;GO:1901566;GO:0019538;GO:0043038;GO:0043039;GO:0022607;GO:0006807;GO:0034660;GO:0044267;GO:0044260;GO:0016043;GO:0065003;GO:1901360;GO:0006421;GO:0008150;GO:0008152;GO:0016070;GO:0044271;GO:0043603;GO:0006518;GO:0044249;GO:0034641;GO:0034645;GO:0044699;GO:0006139;GO:0070145;GO:0009987;GO:0006725;GO:0051259;GO:0043604;GO:…	K01876	DARS, aspS	hsa00970	Aminoacyl-tRNA biosynthesis	COG0173	J:Translation, ribosomal structure and biogenesis	PF00152.17;PF02938.11;PF01336.22	tRNA-synt_2;GAD;tRNA_anti-codon	tRNA synthetases class II;GAD domain;OB-fold nucleic acid binding domain	mitochondrial	10	20	73.5	High
P46977	Dolichyl-diphosphooligosaccharide--protein glycosyltransferase subunit STT3A OS=Homo sapiens OX=9606 GN=STT3A PE=1 SV=2	0.668371	-0.581279	0.01774	down	yes	0.915	1.369	BP:peptidyl-amino acid modification;BP:single-organism catabolic process;BP:single-organism metabolic process;BP:single-organism biosynthetic process;BP:cellular glucan metabolic process;BP:energy reserve metabolic process;BP:myeloid cell activation involved in immune response;BP:oxidation-reduction process;BP:vesicle-mediated transport;BP:cellular catabolic process;BP:protein metabolic process;B…	GO:0018193;GO:0044712;GO:0044710;GO:0044711;GO:0006073;GO:0006112;GO:0002275;GO:0055114;GO:0016192;GO:0044248;GO:0019538;GO:0002274;GO:0016052;GO:0016051;GO:0002376;GO:0045321;GO:0051179;GO:0033692;GO:0044267;GO:1901575;GO:0044262;GO:0044260;GO:0006887;GO:0045055;GO:0002366;GO:0044699;GO:0000271;GO:0006810;GO:0043412;GO:0043413;GO:0008150;GO:0008152;GO:0044723;GO:0002283;GO:0051234;GO:0044724;GO:…	K07151	STT3	hsa04141;hsa00510	Protein processing in endoplasmic reticulum;N-Glycan biosynthesis	COG1287	R:General function prediction only	PF02516.11	STT3	Oligosaccharyl transferase STT3 subunit	ER	15	24	80.5	High
P19823	Inter-alpha-trypsin inhibitor heavy chain H2 OS=Homo sapiens OX=9606 GN=ITIH2 PE=1 SV=2	0.72218	-0.46957	0.0411	down	yes	0.9475	1.312	BP:regulation of metabolic process;BP:organic cyclic compound metabolic process;BP:regulation of primary metabolic process;BP:negative regulation of macromolecule metabolic process;BP:interspecies interaction between organisms;BP:DNA replication;BP:DNA-dependent DNA replication;BP:negative regulation of molecular function;BP:negative regulation of biological process;BP:heterocycle metabolic proce…	GO:0019222;GO:1901360;GO:0080090;GO:0010605;GO:0044419;GO:0006260;GO:0006261;GO:0044092;GO:0048519;GO:0046483;GO:0030212;GO:0060255;GO:0030162;GO:0051704;GO:1901564;GO:0019538;GO:0039693;GO:0030203;GO:0044034;GO:1901576;GO:0051346;GO:0044260;GO:0052547;GO:0065007;GO:0065009;GO:0050790;GO:0050794;GO:0043412;GO:0036211;GO:0008150;GO:0008152;GO:0051336;GO:0009059;GO:0006022;GO:0044249;GO:0034641;GO:…	K19015	ITIH2, SHAP	------	------	COG2304	R:General function prediction only	PF06668.9;PF08487.7;PF00092.25;PF13768.3;PF13519.3	ITI_HC_C;VIT;VWA;VWA_3;VWA_2	Inter-alpha-trypsin inhibitor heavy chain C-terminus;Vault protein inter-alpha-trypsin domain;von Willebrand factor type A domain;von Willebrand factor type A domain;von Willebrand factor type A domain	ER	7	9	106.4	High
O95881	Thioredoxin domain-containing protein 12 OS=Homo sapiens OX=9606 GN=TXNDC12 PE=1 SV=1	0.811594	-0.30117	0.01304	down	yes	1.008	1.242	BP:negative regulation of apoptotic signaling pathway;BP:regulation of apoptotic signaling pathway;BP:negative regulation of response to stimulus;BP:cell differentiation;BP:regulation of endoplasmic reticulum stress-induced intrinsic apoptotic signaling pathway;BP:negative regulation of endoplasmic reticulum stress-induced intrinsic apoptotic signaling pathway;BP:homeostatic process;BP:negative r…	GO:2001234;GO:2001233;GO:0048585;GO:0030154;GO:1902235;GO:1902236;GO:0042592;GO:0023057;GO:0010648;GO:0023051;GO:1903573;GO:0010646;GO:0042981;GO:0050789;GO:0044699;GO:0044710;GO:0010941;GO:0009968;GO:0009966;GO:0048869;GO:0043067;GO:0043066;GO:0065007;GO:0060548;GO:0019725;GO:0048519;GO:0065008;GO:0043069;GO:2001243;GO:2001242;GO:0032502;GO:0048583;GO:0009987;GO:0050794;GO:0044767;GO:0008150;GO:…	K05360	TXNDC12	hsa00480	Glutathione metabolism	------	------	PF13899.3	Thioredoxin_7	Thioredoxin-like	ER	4	27	19.2	High
P04179	Superoxide dismutase [Mn], mitochondrial OS=Homo sapiens OX=9606 GN=SOD2 PE=1 SV=3	0.759608	-0.396673	0.004192	down	yes	0.9685	1.275	BP:tissue homeostasis;BP:response to zinc ion;BP:response to manganese ion;BP:cellular response to stimulus;BP:double-strand break repair;BP:response to external biotic stimulus;BP:regulation of apoptotic signaling pathway;BP:apoptotic DNA fragmentation;BP:relaxation of smooth muscle;BP:DNA repair;BP:negative regulation of cell death;BP:pigment cell differentiation;BP:regulation of protein kinase…	GO:0001894;GO:0010043;GO:0010042;GO:0051716;GO:0006302;GO:0043207;GO:2001233;GO:0006309;GO:0044557;GO:0006281;GO:0060548;GO:0050931;GO:0045859;GO:0007283;GO:0046483;GO:0042325;GO:0042327;GO:0009607;GO:0006575;GO:0009605;GO:0034284;GO:0009892;GO:0009893;GO:0009890;GO:0009891;GO:0000305;GO:0000303;GO:0000302;GO:0098771;GO:0071902;GO:0035556;GO:0071900;GO:0050789;GO:0042554;GO:0051347;GO:0001817;GO:…	K04564	SOD2	hsa04211;hsa04213;hsa05016;hsa04068;hsa04146	Longevity regulating pathway;Longevity regulating pathway - multiple species;Huntington's disease;FoxO signaling pathway;Peroxisome	COG0605	P:Inorganic ion transport and metabolism	PF02777.15;PF00081.19	Sod_Fe_C;Sod_Fe_N	Iron/manganese superoxide dismutases, C-terminal domain;Iron/manganese superoxide dismutases, alpha-hairpin domain	mitochondrial	8	39	24.7	High
G3V325	ATP5MF-PTCD1 readthrough OS=Homo sapiens OX=9606 GN=ATP5MF-PTCD1 PE=4 SV=1	0.757862	-0.399994	0.02352	down	yes	0.964	1.272	BP:nucleic acid metabolic process;BP:cellular nitrogen compound metabolic process;BP:nitrogen compound metabolic process;BP:ncRNA metabolic process;BP:ncRNA processing;BP:organic cyclic compound metabolic process;BP:cellular macromolecule metabolic process;BP:tRNA metabolic process;BP:RNA processing;BP:organic substance metabolic process;BP:tRNA 3'-end processing;BP:tRNA processing;BP:nucleobase-…	GO:0090304;GO:0034641;GO:0006807;GO:0034660;GO:0034470;GO:1901360;GO:0044260;GO:0006399;GO:0006396;GO:0071704;GO:0042780;GO:0008033;GO:0006139;GO:0009987;GO:0006725;GO:0031123;GO:0008150;GO:0008152;GO:0043628;GO:0046483;GO:0016070;GO:0044238;GO:0044237;GO:0043170;GO:0031974;GO:0044446;GO:0005759;GO:0043233;GO:0044464;GO:0005575;GO:0070013;GO:0044444;GO:0044429;GO:0044424;GO:0044422;GO:0003674;GO:…	K02130;K17710	ATPeF0F, ATP5J2;PTCD1	hsa00190	Oxidative phosphorylation	------	------	PF13041.3;PF13812.3;PF17177.1;PF01535.17;PF12854.4	PPR_2;PPR_3;PPR_long;PPR;PPR_1	PPR repeat family;Pentatricopeptide repeat domain;Pentacotripeptide-repeat region of PROPR;PPR repeat;PPR repeat	cytoplasmic	4	7	84.1	High
Q9UKZ1	CCR4-NOT transcription complex subunit 11 OS=Homo sapiens OX=9606 GN=CNOT11 PE=1 SV=1	1.34593	0.428605	0.04298	up	yes	1.282	0.9525	BP:regulation of primary metabolic process;BP:regulation of metabolic process;BP:signal transduction;BP:signal transduction involved in mitotic DNA damage checkpoint;BP:signal transduction involved in mitotic DNA integrity checkpoint;BP:intracellular signal transduction involved in G1 DNA damage checkpoint;BP:organic cyclic compound biosynthetic process;BP:organic cyclic compound metabolic proces…	GO:0080090;GO:0019222;GO:0007165;GO:1902402;GO:1902403;GO:1902400;GO:1901362;GO:1901360;GO:1901361;GO:0051716;GO:2000134;GO:0045787;GO:0072422;GO:0010608;GO:0016458;GO:0048518;GO:0048519;GO:0010605;GO:0060255;GO:2001141;GO:0072413;GO:0046483;GO:0033554;GO:0019439;GO:0019438;GO:0051252;GO:0009892;GO:0006807;GO:0035556;GO:0072401;GO:0090068;GO:1901575;GO:0044265;GO:0044260;GO:0065007;GO:0018130;GO:…	------	------	------	------	------	------	PF10155.6	DUF2363	Uncharacterized conserved protein	mitochondrial	1	4	55.2	High
Q92759	General transcription factor IIH subunit 4 OS=Homo sapiens OX=9606 GN=GTF2H4 PE=1 SV=1	0.804542	-0.313761	0.04342	down	yes	0.992	1.233	BP:regulation of primary metabolic process;BP:regulation of metabolic process;BP:7-methylguanosine RNA capping;BP:male gonad development;BP:organic cyclic compound biosynthetic process;BP:organic cyclic compound metabolic process;BP:transcription initiation from RNA polymerase I promoter;BP:single-organism metabolic process;BP:negative regulation of macromolecule metabolic process;BP:positive reg…	GO:0080090;GO:0019222;GO:0009452;GO:0008584;GO:1901362;GO:1901360;GO:0006361;GO:0044710;GO:0010605;GO:0010604;GO:0051254;GO:0040029;GO:0048513;GO:0048518;GO:0048519;GO:0042127;GO:0032392;GO:0006281;GO:0060255;GO:0006366;GO:0006289;GO:0003006;GO:0071103;GO:2001141;GO:0046483;GO:0044702;GO:0019538;GO:0006370;GO:0010557;GO:0033554;GO:0019438;GO:0006295;GO:0006294;GO:0022607;GO:0009892;GO:0009893;GO:…	K03144	TFIIH4, GTF2H4, TFB2	hsa03022;hsa05203;hsa03420	Basal transcription factors;Viral carcinogenesis;Nucleotide excision repair	COG5144	K:Transcription	PF03849.11;PF13625.3	Tfb2;Helicase_C_3	Transcription factor Tfb2;Helicase conserved C-terminal domain	cytoplasmic	1	3	52.2	High
O60341	Lysine-specific histone demethylase 1A OS=Homo sapiens OX=9606 GN=KDM1A PE=1 SV=2	0.779247	-0.359848	0.004297	down	yes	0.9725	1.248	BP:hemostasis;BP:blood coagulation;BP:small molecule metabolic process;BP:protein K48-linked ubiquitination;BP:cellular response to stimulus;BP:regulation of apoptotic signaling pathway;BP:granulocyte differentiation;BP:regulation of DNA repair;BP:positive regulation of stem cell proliferation;BP:negative regulation of cell death;BP:positive regulation of homeostatic process;BP:regulation of cell…	GO:0007599;GO:0007596;GO:0044281;GO:0070936;GO:0051716;GO:2001233;GO:0030851;GO:0006282;GO:2000648;GO:0060548;GO:0032846;GO:0008361;GO:0006476;GO:0046483;GO:0070988;GO:0019538;GO:0010638;GO:0010639;GO:0009892;GO:0009893;GO:0009890;GO:0009891;GO:0050789;GO:0032091;GO:0042551;GO:0002684;GO:0002682;GO:1901360;GO:0018130;GO:0043412;GO:0002521;GO:0016070;GO:0016071;GO:0031061;GO:0010557;GO:0010556;GO:…	K11450	KDM1A, AOF2, LSD1	------	------	------	------	PF01593.21;PF04433.14;PF13450.3;PF01266.21;PF07992.11	Amino_oxidase;SWIRM;NAD_binding_8;DAO;Pyr_redox_2	Flavin containing amine oxidoreductase;SWIRM domain;NA;FAD dependent oxidoreductase;Pyridine nucleotide-disulphide oxidoreductase	mitochondrial	4	10	92.8	High
O75394	39S ribosomal protein L33, mitochondrial OS=Homo sapiens OX=9606 GN=MRPL33 PE=1 SV=1	0.579943	-0.786017	0.02816	down	yes	0.8125	1.401	BP:primary metabolic process;BP:macromolecular complex subunit organization;BP:cellular amide metabolic process;BP:cellular biosynthetic process;BP:cellular macromolecule biosynthetic process;BP:protein complex disassembly;BP:single-organism process;BP:organic substance biosynthetic process;BP:macromolecular complex disassembly;BP:cellular macromolecule metabolic process;BP:peptide biosynthetic p…	GO:0044238;GO:0043933;GO:0043603;GO:0044249;GO:0034645;GO:0043241;GO:0044699;GO:1901576;GO:0032984;GO:0044260;GO:0043043;GO:0016043;GO:0071704;GO:0071840;GO:0070126;GO:0070125;GO:0044267;GO:0044271;GO:0009987;GO:0009058;GO:0009059;GO:0008150;GO:0008152;GO:1901564;GO:0043624;GO:0006518;GO:0043604;GO:0071822;GO:1901566;GO:0019538;GO:0044763;GO:0034641;GO:0044237;GO:0043170;GO:0006807;GO:0022411;GO:…	K02913	RP-L33, MRPL33, rpmG	hsa03010	Ribosome	COG0267	J:Translation, ribosomal structure and biogenesis	PF00471.17	Ribosomal_L33	Ribosomal protein L33	mitochondrial	1	17	7.6	High
Q01085	Nucleolysin TIAR OS=Homo sapiens OX=9606 GN=TIAL1 PE=1 SV=1	1.25346	0.325912	0.003818	up	yes	1.224	0.9765	BP:regulation of metabolic process;BP:G2/M transition of mitotic cell cycle;BP:regulation of cellular macromolecule biosynthetic process;BP:positive regulation of response to stimulus;BP:learning;BP:behavior;BP:circulatory system process;BP:heart process;BP:cell surface receptor signaling pathway;BP:enzyme linked receptor protein signaling pathway;BP:transmembrane receptor protein tyrosine kinase…	GO:0019222;GO:0000086;GO:2000112;GO:0048584;GO:0007612;GO:0007610;GO:0003013;GO:0003015;GO:0007166;GO:0007167;GO:0007169;GO:0007298;GO:0080090;GO:0048865;GO:0009966;GO:0048869;GO:0010720;GO:0010721;GO:0048518;GO:0048519;GO:0042127;GO:0035114;GO:0010556;GO:0060255;GO:0060548;GO:0007424;GO:0007281;GO:0003006;GO:0007173;GO:0003002;GO:0035277;GO:2001141;GO:0007611;GO:0003008;GO:0023056;GO:0044702;GO:…	K13201	TIA1, TIAL1	------	------	------	------	PF00076.19;PF16842.2;PF14605.3	RRM_1;RRM_occluded;Nup35_RRM_2	RNA recognition motif.;Occluded RNA-recognition motif;Nup53/35/40-type RNA recognition motif	cytoplasmic	3	11	41.6	High
Q86SZ2	Trafficking protein particle complex subunit 6B OS=Homo sapiens OX=9606 GN=TRAPPC6B PE=1 SV=1	1.57143	0.652077	0.01597	up	yes	1.342	0.854	BP:vesicle coating;BP:cellular component organization or biogenesis;BP:DNA replication;BP:DNA-dependent DNA replication;BP:heterocycle metabolic process;BP:vesicle-mediated transport;BP:vesicle organization;BP:cellular component assembly;BP:nitrogen compound metabolic process;BP:organic substance biosynthetic process;BP:ER to Golgi vesicle-mediated transport;BP:cellular macromolecule metabolic pr…	GO:0006901;GO:0071840;GO:0006260;GO:0006261;GO:0046483;GO:0016192;GO:0016050;GO:0022607;GO:0006807;GO:1901576;GO:0006888;GO:0044260;GO:0016043;GO:0065003;GO:0065007;GO:1901360;GO:0065009;GO:0050790;GO:0006810;GO:0008150;GO:0008152;GO:0051234;GO:0051336;GO:0046907;GO:0009058;GO:0044249;GO:0034641;GO:0034645;GO:0043087;GO:0044699;GO:0006139;GO:0009987;GO:0006725;GO:0043170;GO:0048208;GO:0043933;GO:…	K20304	TRAPPC6, TRS33	------	------	------	------	PF04051.13	TRAPP	Transport protein particle	cytoplasmic	1	9	18	High
P02748	Complement component C9 OS=Homo sapiens OX=9606 GN=C9 PE=1 SV=2	0.809818	-0.30433	0.03239	down	yes	0.9815	1.212	BP:regulation of primary metabolic process;BP:regulation of metabolic process;BP:positive regulation of response to stimulus;BP:regulation of response to stimulus;BP:cellular component organization or biogenesis;BP:cytolysis in other organism;BP:single-organism metabolic process;BP:regulation of inflammatory response;BP:regulation of granulocyte differentiation;BP:negative regulation of granulocy…	GO:0080090;GO:0019222;GO:0048584;GO:0048583;GO:0071840;GO:0051715;GO:0044710;GO:0050727;GO:0030852;GO:0030853;GO:0051817;GO:0048518;GO:0002682;GO:0001906;GO:0051818;GO:0002683;GO:0051093;GO:0060255;GO:2000257;GO:0050776;GO:0030162;GO:0002673;GO:0051701;GO:1903706;GO:1903707;GO:0051704;GO:0019538;GO:0002376;GO:0045650;GO:0022607;GO:0030449;GO:0002920;GO:0050789;GO:0019835;GO:0019836;GO:0045649;GO:…	K04000	C9	hsa05322;hsa05146;hsa04610;hsa05020	Systemic lupus erythematosus;Amoebiasis;Complement and coagulation cascades;Prion diseases	------	------	PF01823.16;PF00057.15	MACPF;Ldl_recept_a	MAC/Perforin domain;Low-density lipoprotein receptor domain class A	Golgi apparatus	2	4	63.1	High
Q6P1Q0	LETM1 domain-containing protein 1 OS=Homo sapiens OX=9606 GN=LETMD1 PE=1 SV=1	0.793443	-0.333802	0.04985	down	yes	0.968	1.22	BP:inorganic ion homeostasis;BP:organic cyclic compound metabolic process;BP:organic cyclic compound catabolic process;BP:DNA catabolic process;BP:cellular homeostasis;BP:heterocycle metabolic process;BP:regulation of biological quality;BP:chemical homeostasis;BP:aromatic compound catabolic process;BP:nitrogen compound metabolic process;BP:organic substance catabolic process;BP:cellular macromole…	GO:0098771;GO:1901360;GO:1901361;GO:0006308;GO:0019725;GO:0046483;GO:0065008;GO:0048878;GO:0019439;GO:0006807;GO:1901575;GO:0044265;GO:0044260;GO:0065007;GO:0006139;GO:0046700;GO:0008150;GO:0008152;GO:0034655;GO:0044270;GO:0050801;GO:0044248;GO:0034641;GO:0044699;GO:0006875;GO:0009987;GO:0006725;GO:0006873;GO:0030003;GO:0055080;GO:0055082;GO:0090304;GO:0043170;GO:0042592;GO:0071704;GO:0044763;GO:…	------	------	------	------	------	------	PF07766.10	LETM1	LETM1-like protein	mitochondrial	2	7	41.8	High
P62805	Histone H4 OS=Homo sapiens OX=9606 GN=H4C1 PE=1 SV=2	0.754013	-0.407339	0.02585	down	yes	0.9395	1.246	BP:regulation of primary metabolic process;BP:regulation of metabolic process;BP:anatomical structure homeostasis;BP:ossification;BP:chromatin remodeling at centromere;BP:cellular component organization or biogenesis;BP:RNA biosynthetic process;BP:single-organism metabolic process;BP:negative regulation of macromolecule metabolic process;BP:double-strand break repair;BP:cellular developmental pro…	GO:0080090;GO:0019222;GO:0060249;GO:0001503;GO:0031055;GO:0071840;GO:0032774;GO:0044710;GO:0010605;GO:0006302;GO:0048869;GO:0043044;GO:0040029;GO:0016458;GO:0048518;GO:0048519;GO:0002683;GO:0051259;GO:0034723;GO:0006281;GO:0060255;GO:0051291;GO:0051290;GO:0060147;GO:2001141;GO:1903706;GO:1903707;GO:0046483;GO:0044707;GO:0019538;GO:0045652;GO:0045653;GO:0033554;GO:0019438;GO:0006334;GO:0022607;GO:…	K11254	H4	hsa05322;hsa05203;hsa05034	Systemic lupus erythematosus;Viral carcinogenesis;Alcoholism	COG2036	B:Chromatin structure and dynamics	PF15511.3	CENP-T_C	Centromere kinetochore component CENP-T histone fold	cytoplasmic	13	66	11.4	High
E7EQL5	Cytoplasmic dynein 1 intermediate chain 2 (Fragment) OS=Homo sapiens OX=9606 GN=DYNC1I2 PE=1 SV=1	1.38655	0.4715	0.02974	up	yes	1.268	0.9145	BP:cell cycle G2/M phase transition;BP:G2/M transition of mitotic cell cycle;BP:antigen processing and presentation of peptide antigen via MHC class II;BP:movement of cell or subcellular component;BP:cell cycle phase transition;BP:mitotic cell cycle phase transition;BP:cell cycle process;BP:antigen processing and presentation of peptide antigen;BP:single-organism process;BP:immune system process;…	GO:0044839;GO:0000086;GO:0002495;GO:0006928;GO:0044770;GO:0044772;GO:0022402;GO:0048002;GO:0044699;GO:0002376;GO:0006888;GO:0002478;GO:0044419;GO:0019882;GO:0009987;GO:0019884;GO:0019886;GO:0048193;GO:0006810;GO:0044765;GO:0044764;GO:0008150;GO:1903047;GO:0051649;GO:0044403;GO:0051234;GO:0051179;GO:1902578;GO:0051704;GO:0002504;GO:0007017;GO:0016192;GO:0046907;GO:0007018;GO:0044763;GO:0016032;GO:…	------	------	------	------	------	------	PF11540.5	Dynein_IC2	Cytoplasmic dynein 1 intermediate chain 2	nuclear	1	32	34.9	High
A0A1W2PPJ5	Protein cereblon OS=Homo sapiens OX=9606 GN=CRBN PE=1 SV=1	1.21074	0.275889	0.04127	up	yes	1.195	0.987	BP:regulation of transport;BP:regulation of ion transmembrane transport;BP:negative regulation of ion transmembrane transport;BP:regulation of transmembrane transport;BP:negative regulation of transmembrane transport;BP:protein modification by small protein conjugation or removal;BP:protein modification by small protein conjugation;BP:positive regulation of molecular function;BP:negative regulati…	GO:0051049;GO:0034765;GO:0034766;GO:0034762;GO:0034763;GO:0070647;GO:0032446;GO:0044093;GO:0048519;GO:0051051;GO:0030163;GO:0019538;GO:0090073;GO:0016567;GO:0031333;GO:0044267;GO:0032092;GO:0044265;GO:0044260;GO:0065007;GO:0065009;GO:0043412;GO:0036211;GO:0043393;GO:0008152;GO:0043254;GO:0050794;GO:0010498;GO:0043496;GO:0006511;GO:0008150;GO:0051129;GO:0051128;GO:0044248;GO:0043161;GO:0006508;GO:…	K11793	CRBN	------	------	------	------	PF02190.13;PF03226.11	LON_substr_bdg;Yippee-Mis18	ATP-dependent protease La;Yippee zinc-binding/DNA-binding /Mis18, centromere assembly	cytoplasmic	3	13	55.7	High
B5MBX0	Sororin OS=Homo sapiens OX=9606 GN=CDCA5 PE=1 SV=1	0.735577	-0.443052	0.04241	down	yes	0.918	1.248	CC:intracellular organelle part;CC:cellular_component;CC:cell part;CC:intracellular organelle;CC:mitochondrion;CC:nucleoplasm;CC:cytoplasmic part;CC:nuclear part;CC:intracellular part;CC:membrane-bounded organelle;CC:organelle;CC:organelle part;CC:intracellular membrane-bounded organelle;	GO:0044446;GO:0005575;GO:0044464;GO:0043229;GO:0005739;GO:0005654;GO:0044444;GO:0044428;GO:0044424;GO:0043227;GO:0043226;GO:0044422;GO:0043231	------	------	------	------	------	------	PF09666.7	Sororin	Sororin protein	mitochondrial	1	8	33.7	High
Q9NZR1	Tropomodulin-2 OS=Homo sapiens OX=9606 GN=TMOD2 PE=1 SV=1	0.744346	-0.425955	0.004708	down	yes	0.9215	1.238	BP:positive regulation of response to stimulus;BP:behavior;BP:learning or memory;BP:regulation of actin polymerization or depolymerization;BP:muscle system process;BP:cellular component organization or biogenesis;BP:regulation of signal transduction;BP:positive regulation of signal transduction;BP:negative regulation of cytoskeleton organization;BP:regulation of cytoskeleton organization;BP:posit…	GO:0048584;GO:0007610;GO:0007611;GO:0008064;GO:0003012;GO:0071840;GO:0009966;GO:0009967;GO:0051494;GO:0051493;GO:0048518;GO:0048519;GO:0006936;GO:0048583;GO:1901880;GO:0003008;GO:0044700;GO:0044707;GO:0044708;GO:0008277;GO:0098916;GO:0031333;GO:0022607;GO:1901879;GO:0010639;GO:0016043;GO:0090066;GO:0065007;GO:0065008;GO:0048646;GO:0050794;GO:0051128;GO:0008150;GO:0048731;GO:0043254;GO:0050890;GO:…	K10370	TMOD	------	------	------	------	PF03250.11	Tropomodulin	Tropomodulin	cytoplasmic	1	2	39.6	High
P54819	Adenylate kinase 2, mitochondrial OS=Homo sapiens OX=9606 GN=AK2 PE=1 SV=2	0.76087	-0.394279	0.0344	down	yes	0.9275	1.219	BP:purine deoxyribonucleoside triphosphate metabolic process;BP:purine ribonucleoside monophosphate metabolic process;BP:nucleotide biosynthetic process;BP:small molecule metabolic process;BP:ribonucleoside monophosphate metabolic process;BP:organic cyclic compound biosynthetic process;BP:organic cyclic compound metabolic process;BP:single-organism catabolic process;BP:single-organism metabolic p…	GO:0009215;GO:0009167;GO:0009165;GO:0044281;GO:0009161;GO:1901362;GO:1901360;GO:0044712;GO:0044710;GO:0046128;GO:0097066;GO:0044711;GO:0048513;GO:0006664;GO:0006665;GO:0006172;GO:0009205;GO:0009200;GO:0046034;GO:0046031;GO:0046033;GO:1901564;GO:0046129;GO:0009179;GO:0010033;GO:0042455;GO:0046483;GO:1901566;GO:0034641;GO:0006163;GO:0042451;GO:1901136;GO:0006677;GO:0018130;GO:0009163;GO:0009259;GO:…	K00939	adk, AK	hsa00730;hsa00230	Thiamine metabolism;Purine metabolism	COG0563	F:Nucleotide transport and metabolism	PF00406.19;PF13207.3;PF05191.11;PF13671.3	ADK;AAA_17;ADK_lid;AAA_33	Adenylate kinase;AAA domain;Adenylate kinase, active site lid;AAA domain	cytoplasmic	4	68	26.5	High
Q9BTD8	RNA-binding protein 42 OS=Homo sapiens OX=9606 GN=RBM42 PE=1 SV=1	1.28526	0.362056	0.03074	up	yes	1.203	0.936	BP:negative regulation of RNA splicing;BP:negative regulation of metabolic process;BP:regulation of primary metabolic process;BP:regulation of metabolic process;BP:regulation of mRNA processing;BP:negative regulation of mRNA processing;BP:regulation of cellular metabolic process;BP:regulation of biological process;BP:negative regulation of gene expression;BP:regulation of mRNA splicing, via splic…	GO:0033119;GO:0009892;GO:0080090;GO:0019222;GO:0050684;GO:0050686;GO:0031323;GO:0050789;GO:0010629;GO:0048024;GO:0048025;GO:0010605;GO:0043484;GO:0019219;GO:0065007;GO:0048519;GO:0010468;GO:0031324;GO:0045934;GO:0060255;GO:0050794;GO:0008150;GO:0051171;GO:0051172;GO:0051253;GO:0051252;GO:1903311;GO:0048523;GO:1903312;GO:0043226;GO:0043227;GO:0005737;GO:0016021;GO:0031224;GO:0043231;GO:0044464;GO:…	------	------	------	------	------	------	PF00076.19	RRM_1	RNA recognition motif.	cytoplasmic	2	10	50.4	High
P13804	Electron transfer flavoprotein subunit alpha, mitochondrial OS=Homo sapiens OX=9606 GN=ETFA PE=1 SV=1	0.811545	-0.301257	0.04927	down	yes	0.956	1.178	BP:lipid oxidation;BP:fatty acid metabolic process;BP:fatty acid beta-oxidation;BP:carboxylic acid metabolic process;BP:cellular catabolic process;BP:fatty acid catabolic process;BP:small molecule catabolic process;BP:generation of precursor metabolites and energy;BP:cellular lipid catabolic process;BP:single-organism metabolic process;BP:lipid modification;BP:biological_process;BP:organic substa…	GO:0034440;GO:0006631;GO:0006635;GO:0019752;GO:0044248;GO:0009062;GO:0044282;GO:0006091;GO:0044242;GO:0044710;GO:0030258;GO:0008150;GO:0071704;GO:0042592;GO:0022900;GO:0065007;GO:0044699;GO:0022904;GO:0065008;GO:0016042;GO:0044712;GO:0006629;GO:0009987;GO:1901575;GO:0032787;GO:0008152;GO:0072329;GO:0043436;GO:0019395;GO:0044255;GO:0009056;GO:0055114;GO:0055088;GO:0044238;GO:0006082;GO:0016054;GO:…	K03522	fixB, etfA	------	------	COG2025	C:Energy production and conversion	PF01012.18;PF00766.16	ETF;ETF_alpha	Electron transfer flavoprotein domain;Electron transfer flavoprotein FAD-binding domain	mitochondrial	17	68	35.1	High
O95831	Apoptosis-inducing factor 1, mitochondrial OS=Homo sapiens OX=9606 GN=AIFM1 PE=1 SV=1	0.822498	-0.281916	0.03808	down	yes	0.9615	1.169	BP:response to abiotic stimulus;BP:regulation of primary metabolic process;BP:regulation of metabolic process;BP:positive regulation of neuron apoptotic process;BP:response to estradiol;BP:regulation of neuron apoptotic process;BP:cellular component organization;BP:cellular component organization or biogenesis;BP:response to amino acid;BP:single-organism metabolic process;BP:positive regulation o…	GO:0009628;GO:0080090;GO:0019222;GO:0043525;GO:0032355;GO:0043523;GO:0016043;GO:0071840;GO:0043200;GO:0044710;GO:0010604;GO:0048869;GO:0090649;GO:0010257;GO:0044093;GO:0048518;GO:0043280;GO:0019725;GO:0051052;GO:0060255;GO:0031960;GO:0030162;GO:1902510;GO:0010035;GO:0010033;GO:0055114;GO:0031668;GO:0031669;GO:0009605;GO:0019538;GO:0010243;GO:0031667;GO:0071310;GO:0007154;GO:0033554;GO:0071407;GO:…	K04727	PDCD8, AIF	hsa04210	Apoptosis	COG0446	C:Energy production and conversion	PF14721.3;PF07992.11;PF00070.24;PF13738.3	AIF_C;Pyr_redox_2;Pyr_redox;Pyr_redox_3	Apoptosis-inducing factor, mitochondrion-associated, C-term;Pyridine nucleotide-disulphide oxidoreductase;Pyridine nucleotide-disulphide oxidoreductase;Pyridine nucleotide-disulphide oxidoreductase	mitochondrial	19	46	66.9	High
P31942	Heterogeneous nuclear ribonucleoprotein H3 OS=Homo sapiens OX=9606 GN=HNRNPH3 PE=1 SV=2	1.37723	0.461772	0.02556	up	yes	1.234	0.896	BP:organic cyclic compound metabolic process;BP:single-organism metabolic process;BP:DNA modification;BP:response to external biotic stimulus;BP:DNA cytosine deamination;BP:cellular developmental process;BP:regulation of transposition;BP:negative regulation of transposition;BP:epithelial cell differentiation;BP:negative regulation of biological process;BP:response to other organism;BP:heterocycle…	GO:1901360;GO:0044710;GO:0006304;GO:0043207;GO:0070383;GO:0048869;GO:0010528;GO:0010529;GO:0030855;GO:0048519;GO:0051707;GO:0046483;GO:0070988;GO:0009607;GO:0009605;GO:0044356;GO:0009410;GO:0044355;GO:0002376;GO:0006950;GO:0006807;GO:0065007;GO:0006139;GO:0050792;GO:0051716;GO:0050794;GO:0006952;GO:0043900;GO:0043901;GO:0008150;GO:0008152;GO:0006955;GO:0016070;GO:0051607;GO:0043903;GO:0050896;GO:…	K12898	HNRNPF_H	------	------	------	------	PF00076.19	RRM_1	RNA recognition motif.	cytoplasmic	9	49	36.9	High
Q5TGZ0	MICOS complex subunit MIC10 OS=Homo sapiens OX=9606 GN=MICOS10 PE=1 SV=1	0.676911	-0.562962	0.02534	down	yes	0.859	1.269	BP:biological_process;CC:cell part;CC:inclusion body;CC:aggresome;CC:intracellular organelle;CC:membrane-bounded organelle;CC:organelle;CC:intrinsic component of membrane;CC:cellular_component;CC:organelle membrane;CC:membrane protein complex;CC:integral component of membrane;CC:membrane;CC:mitochondrion;CC:inner mitochondrial membrane protein complex;CC:mitochondrial membrane part;CC:mitochondri…	GO:0008150;GO:0044464;GO:0016234;GO:0016235;GO:0043229;GO:0043227;GO:0043226;GO:0031224;GO:0005575;GO:0031090;GO:0098796;GO:0016021;GO:0016020;GO:0005739;GO:0098800;GO:0044455;GO:0031966;GO:0005886;GO:0061617;GO:0043234;GO:0032991;GO:0043231;GO:0019866;GO:0044446;GO:0005743;GO:0044444;GO:0044429;GO:0044424;GO:0044425;GO:0044422;GO:0098798;GO:0035639;GO:1901363;GO:0032553;GO:0003674;GO:0005488;GO:…	K17784	MINOS1, MOS1	------	------	------	------	PF04418.9	DUF543	Domain of unknown function	cytoplasmic	2	51	8.8	High
F5H872	Mediator of RNA polymerase II transcription subunit 21 OS=Homo sapiens OX=9606 GN=MED21 PE=1 SV=1	1.36795	0.452016	0.0236	up	yes	1.225	0.8955	BP:regulation of primary metabolic process;BP:regulation of metabolic process;BP:organic cyclic compound biosynthetic process;BP:organic cyclic compound metabolic process;BP:positive regulation of macromolecule metabolic process;BP:blastocyst development;BP:protein modification by small protein conjugation;BP:positive regulation of biological process;BP:regulation of macromolecule metabolic proce…	GO:0080090;GO:0019222;GO:1901362;GO:1901360;GO:0010604;GO:0001824;GO:0032446;GO:0048518;GO:0060255;GO:2001141;GO:0046483;GO:0019827;GO:0044707;GO:0019538;GO:0016567;GO:0009893;GO:0009891;GO:0010628;GO:0050789;GO:0097659;GO:1901576;GO:0044260;GO:0065007;GO:0018130;GO:0009889;GO:0050794;GO:0098727;GO:0043412;GO:0036211;GO:0008150;GO:0008152;GO:0019438;GO:0034654;GO:0016070;GO:0044271;GO:0006355;GO:…	K15152	MED21, SRB7	------	------	------	------	PF11221.5	Med21	Subunit 21 of Mediator complex	cytoplasmic	1	16	17.3	High
O00487	26S proteasome non-ATPase regulatory subunit 14 OS=Homo sapiens OX=9606 GN=PSMD14 PE=1 SV=1	1.30577	0.384898	0.0462	up	yes	1.2	0.919	BP:exocytosis;BP:cytokine-mediated signaling pathway;BP:regulation of cellular macromolecule biosynthetic process;BP:negative regulation of response to stimulus;BP:positive regulation of response to stimulus;BP:regulation of response to stimulus;BP:negative regulation of cellular macromolecule biosynthetic process;BP:positive regulation of defense response;BP:regulation of Wnt signaling pathway;B…	GO:0006887;GO:0019221;GO:2000112;GO:0048585;GO:0048584;GO:0048583;GO:2000113;GO:0031349;GO:0030111;GO:0007165;GO:0007166;GO:0032940;GO:0023014;GO:0080090;GO:0044710;GO:0010605;GO:0019222;GO:0009968;GO:0009966;GO:0009967;GO:0002263;GO:0000165;GO:0070646;GO:0032446;GO:0033238;GO:0044093;GO:0044092;GO:0048518;GO:0048519;GO:0016192;GO:0070536;GO:2000060;GO:0033209;GO:0006281;GO:0060255;GO:0002283;GO:…	K03030	PSMD14, RPN11, POH1	hsa03050;hsa05169	Proteasome;Epstein-Barr virus infection	COG1310	R:General function prediction only	PF01398.18;PF13012.3;PF14464.3	JAB;MitMem_reg;Prok-JAB	JAB1/Mov34/MPN/PAD-1 ubiquitin protease;Maintenance of mitochondrial structure and function;Prokaryotic homologs of the JAB domain	cytoplasmic	5	36	34.6	High
Q8IUE6	Histone H2A type 2-B OS=Homo sapiens OX=9606 GN=HIST2H2AB PE=1 SV=3	0.735656	-0.442897	0.00801	down	yes	0.8975	1.22	BP:regulation of primary metabolic process;BP:regulation of metabolic process;BP:organic cyclic compound biosynthetic process;BP:cellular component organization or biogenesis;BP:negative regulation of macromolecule metabolic process;BP:regulation of gene expression, epigenetic;BP:gene silencing;BP:negative regulation of biological process;BP:regulation of macromolecule metabolic process;BP:regula…	GO:0080090;GO:0019222;GO:1901362;GO:0071840;GO:0010605;GO:0040029;GO:0016458;GO:0048519;GO:0060255;GO:2001141;GO:0046483;GO:0019438;GO:0009892;GO:0009890;GO:0010629;GO:0006807;GO:0097659;GO:1901576;GO:0044260;GO:0016043;GO:0065007;GO:1901360;GO:0018130;GO:0009889;GO:0050794;GO:0008150;GO:0008152;GO:0034654;GO:0016070;GO:0044271;GO:0006355;GO:0010556;GO:0006351;GO:0010558;GO:0032774;GO:0044249;GO:…	K11251	H2A	hsa05322;hsa05034	Systemic lupus erythematosus;Alcoholism	COG5262	B:Chromatin structure and dynamics	PF16211.2;PF00125.21	Histone_H2A_C;Histone	C-terminus of histone H2A;Core histone H2A/H2B/H3/H4	nuclear	2	42	14	High
A0A087WWM1	Mucin-1 OS=Homo sapiens OX=9606 GN=MUC1 PE=1 SV=1	1.23729	0.307182	0.04239	up	yes	1.168	0.944	BP:single-organism process;BP:ER to Golgi vesicle-mediated transport;BP:Golgi vesicle transport;BP:transport;BP:single-organism transport;BP:biological_process;BP:establishment of localization in cell;BP:establishment of localization;BP:localization;BP:single-organism localization;BP:vesicle-mediated transport;BP:intracellular transport;BP:single-organism intracellular transport;CC:endoplasmic re…	GO:0044699;GO:0006888;GO:0048193;GO:0006810;GO:0044765;GO:0008150;GO:0051649;GO:0051234;GO:0051179;GO:1902578;GO:0016192;GO:0046907;GO:1902582;GO:0005783;GO:0043229;GO:0043227;GO:0043226;GO:0044446;GO:0031090;GO:0016021;GO:0016020;GO:0030008;GO:0044431;GO:0031224;GO:0044425;GO:0005794;GO:0098588;GO:0043234;GO:0032991;GO:0043231;GO:0005829;GO:0044464;GO:0000139;GO:0005575;GO:0044444;GO:0044424;GO:…	------	------	------	------	------	------	PF01390.17	SEA	SEA domain	extracellular	1	1	122.9	High
P02452	Collagen alpha-1(I) chain OS=Homo sapiens OX=9606 GN=COL1A1 PE=1 SV=5	0.755417	-0.404655	0.04313	down	yes	0.9065	1.2	BP:protein localization;BP:hemostasis;BP:regulation of metabolic process;BP:cell communication;BP:positive regulation of stem cell differentiation;BP:blood coagulation;BP:regulation of response to stimulus;BP:positive regulation of nitrogen compound metabolic process;BP:skeletal system development;BP:regulation of Wnt signaling pathway;BP:ossification;BP:face morphogenesis;BP:signal transduction;…	GO:0008104;GO:0007599;GO:0019222;GO:0007154;GO:2000738;GO:0007596;GO:0048583;GO:0051173;GO:0001501;GO:0030111;GO:0001503;GO:0060325;GO:0007165;GO:0007166;GO:0007167;GO:0007169;GO:0014074;GO:0044707;GO:0071840;GO:0080090;GO:0044712;GO:0043200;GO:0051716;GO:0044711;GO:0070727;GO:0009966;GO:0048869;GO:0070849;GO:0070848;GO:0009612;GO:0048513;GO:0010720;GO:0048518;GO:0048519;GO:0033036;GO:0048584;GO:…	K06236	COL1A	hsa05146;hsa04611;hsa04512;hsa04510;hsa04974;hsa04151;hsa04933	Amoebiasis;Platelet activation;ECM-receptor interaction;Focal adhesion;Protein digestion and absorption;PI3K-Akt signaling pathway;AGE-RAGE signaling pathway in diabetic complications	------	------	PF01391.15;PF01410.15;PF00093.15	Collagen;COLFI;VWC	Collagen triple helix repeat;Fibrillar collagen C-terminal domain;von Willebrand factor type C domain	extracellular	3	2	138.9	High
P21912	Succinate dehydrogenase [ubiquinone] iron-sulfur subunit, mitochondrial OS=Homo sapiens OX=9606 GN=SDHB PE=1 SV=3	0.774452	-0.368752	0.02122	down	yes	0.9185	1.186	BP:small molecule metabolic process;BP:tricarboxylic acid metabolic process;BP:single-organism metabolic process;BP:electron transport chain;BP:respiratory electron transport chain;BP:oxoacid metabolic process;BP:oxidation-reduction process;BP:dicarboxylic acid metabolic process;BP:aerobic respiration;BP:cellular respiration;BP:metabolic process;BP:citrate metabolic process;BP:biological_process;…	GO:0044281;GO:0072350;GO:0044710;GO:0022900;GO:0022904;GO:0043436;GO:0055114;GO:0043648;GO:0009060;GO:0045333;GO:0008152;GO:0006101;GO:0008150;GO:0044699;GO:0044238;GO:0009987;GO:0015980;GO:0006082;GO:0006121;GO:0019752;GO:0006099;GO:0006091;GO:0006105;GO:0071704;GO:0044763;GO:0044237;GO:0045283;GO:0031982;GO:0016020;GO:1902494;GO:0031966;GO:0043234;GO:0045257;GO:0043230;GO:0043231;GO:0044428;GO:…	K00235	SDHB, SDH2	hsa00190;hsa00020;hsa01200;hsa05012;hsa05016;hsa05010;hsa04932	Oxidative phosphorylation;Citrate cycl;Carbon metabolism;Parkinson's disease;Huntington's disease;Alzheimer's disease;Non-alcoholic fatty liver diseas	COG0479	C:Energy production and conversion	PF13085.3;PF13534.3;PF13183.3;PF13237.3	Fer2_3;Fer4_17;Fer4_8;Fer4_10	2Fe-2S iron-sulfur cluster binding domain;4Fe-4S dicluster domain;4Fe-4S dicluster domain;4Fe-4S dicluster domain	mitochondrial	6	24	31.6	High
A0A0A0MRJ7	Coagulation factor V OS=Homo sapiens OX=9606 GN=F5 PE=1 SV=1	0.722131	-0.469667	0.01749	down	yes	0.881	1.22	BP:vesicle coating;BP:circulatory system process;BP:cellular component organization or biogenesis;BP:platelet activation;BP:system process;BP:vesicle organization;BP:cellular component assembly;BP:secretion by cell;BP:exocytosis;BP:cellular component organization;BP:regulated exocytosis;BP:macromolecular complex assembly;BP:blood circulation;BP:transport;BP:cell activation;BP:biological_process;B…	GO:0006901;GO:0003013;GO:0071840;GO:0030168;GO:0003008;GO:0016050;GO:0022607;GO:0032940;GO:0006887;GO:0016043;GO:0045055;GO:0065003;GO:0008015;GO:0006810;GO:0001775;GO:0008150;GO:0051234;GO:0046903;GO:0044699;GO:0032501;GO:0009987;GO:0048208;GO:0043933;GO:0071822;GO:0002576;GO:0006461;GO:0044765;GO:0044763;GO:0051179;GO:1902578;GO:0006996;GO:0016192;GO:0031974;GO:0044433;GO:0031983;GO:0031982;GO:…	K03902	F5	hsa04610	Complement and coagulation cascades	------	------	PF00754.22;PF07732.12	F5_F8_type_C;Cu-oxidase_3	F5/8 type C domain;Multicopper oxidase	cytoplasmic	10	6	252.1	High
Q6NXR4	TELO2-interacting protein 2 OS=Homo sapiens OX=9606 GN=TTI2 PE=1 SV=1	1.5153	0.599601	0.03725	up	yes	1.263	0.8335	CC:intracellular organelle;CC:non-membrane-bounded organelle;CC:organelle;CC:intracellular organelle part;CC:centrosome;CC:membrane;CC:microtubule organizing center;CC:nucleoplasm;CC:cytoskeletal part;CC:intracellular non-membrane-bounded organelle;CC:cytosol;CC:cell part;CC:cellular_component;CC:cytoplasmic part;CC:nuclear part;CC:intracellular part;CC:organelle part;MF:purine ribonucleoside tri…	GO:0043229;GO:0043228;GO:0043226;GO:0044446;GO:0005813;GO:0016020;GO:0005815;GO:0005654;GO:0044430;GO:0043232;GO:0005829;GO:0044464;GO:0005575;GO:0044444;GO:0044428;GO:0044424;GO:0044422;GO:0035639;GO:1901363;GO:0003674;GO:0005488;GO:0000166;GO:0001883;GO:0001882;GO:0043168;GO:0019001;GO:0032561;GO:1901265;GO:0032549;GO:0017076;GO:0005525;GO:0016787;GO:0003924;GO:0017111;GO:0036094;GO:0003824;GO:…	------	------	------	------	------	------	PF10521.6	DUF2454	Protein of unknown function	cytoplasmic	2	5	56.9	High
H0YBN6	Casein kinase I isoform gamma-3 (Fragment) OS=Homo sapiens OX=9606 GN=CSNK1G3 PE=1 SV=1	1.33742	0.419456	0.04697	up	yes	1.199	0.8965	MF:catalytic activity;MF:phosphotransferase activity, alcohol group as acceptor;MF:transferase activity, transferring phosphorus-containing groups;MF:kinase activity;MF:protein serine/threonine kinase activity;MF:transferase activity;MF:molecular_function;MF:RNA binding;MF:nucleic acid binding;MF:protein kinase activity;MF:organic cyclic compound binding;MF:heterocyclic compound binding;MF:bindin…	GO:0003824;GO:0016773;GO:0016772;GO:0016301;GO:0004674;GO:0016740;GO:0003674;GO:0003723;GO:0003676;GO:0004672;GO:0097159;GO:1901363;GO:0005488	------	------	------	------	------	------	PF12605.5	CK1gamma_C	Casein kinase 1 gamma C terminal	cytoplasmic	1	24	19.3	High
O43148	mRNA cap guanine-N7 methyltransferase OS=Homo sapiens OX=9606 GN=RNMT PE=1 SV=1	1.28533	0.362133	0.04915	up	yes	1.178	0.9165	BP:protein localization;BP:regulation of transport;BP:RNA modification;BP:organic cyclic compound biosynthetic process;BP:organic cyclic compound metabolic process;BP:cellular response to stimulus;BP:positive regulation of molecular function;BP:macromolecule localization;BP:endosomal transport;BP:7-methylguanosine RNA capping;BP:establishment of protein localization;BP:RNA methylation;BP:response…	GO:0008104;GO:0051049;GO:0009451;GO:1901362;GO:1901360;GO:0051716;GO:0044093;GO:0033036;GO:0016197;GO:0009452;GO:0045184;GO:0001510;GO:0010033;GO:0046483;GO:0006370;GO:0019438;GO:0036265;GO:0070887;GO:0036260;GO:0090630;GO:0006807;GO:0097659;GO:1901576;GO:0043547;GO:0044260;GO:0006886;GO:0065007;GO:0044699;GO:0006366;GO:0065009;GO:0032259;GO:0018130;GO:0050790;GO:0034097;GO:0042147;GO:0006810;GO:…	K00565	RNMT	hsa03015	mRNA surveillance pathway	------	------	PF03291.13;PF13649.3;PF13847.3;PF08241.9;PF13489.3;PF08242.9	Pox_MCEL;Methyltransf_25;Methyltransf_31;Methyltransf_11;Methyltransf_23;Methyltransf_12	mRNA capping enzyme;Methyltransferase domain;Methyltransferase domain;Methyltransferase domain;Methyltransferase domain;Methyltransferase domain	nuclear	2	6	54.8	High
Q9P0S9	Transmembrane protein 14C OS=Homo sapiens OX=9606 GN=TMEM14C PE=1 SV=1	0.79181	-0.336773	0.02566	down	yes	0.9185	1.16	BP:regulation of metabolic process;BP:porphyrin-containing compound metabolic process;BP:porphyrin-containing compound biosynthetic process;BP:organic cyclic compound biosynthetic process;BP:cellular lipid metabolic process;BP:organic cyclic compound metabolic process;BP:regulation of primary metabolic process;BP:single-organism metabolic process;BP:single-organism biosynthetic process;BP:pigment…	GO:0019222;GO:0006778;GO:0006779;GO:1901362;GO:0044255;GO:1901360;GO:0080090;GO:0044710;GO:0044711;GO:0042440;GO:0006783;GO:1900060;GO:0045833;GO:0048519;GO:0006665;GO:0019725;GO:0051055;GO:0060255;GO:0046483;GO:1901564;GO:1901566;GO:0048878;GO:0006672;GO:0009892;GO:0009890;GO:0006807;GO:1901576;GO:0051186;GO:0051188;GO:0033014;GO:0033013;GO:0065008;GO:0018130;GO:0006629;GO:0009889;GO:0050794;GO:…	------	------	------	------	------	------	PF03647.10	Tmemb_14	Transmembrane proteins 14C	extracellular	2	41	11.6	High
Q9Y2R4	Probable ATP-dependent RNA helicase DDX52 OS=Homo sapiens OX=9606 GN=DDX52 PE=1 SV=3	0.810917	-0.302374	0.01073	down	yes	0.9285	1.145	BP:regulation of secretion;BP:positive regulation of secretion;BP:negative regulation of secretion;BP:regulation of transport;BP:cellular response to stimulus;BP:response to external biotic stimulus;BP:regulation of protein kinase activity;BP:regulation of molecular function;BP:heterocycle metabolic process;BP:regulation of phosphorylation;BP:negative regulation of phosphorylation;BP:response to …	GO:0051046;GO:0051047;GO:0051048;GO:0051049;GO:0051716;GO:0043207;GO:0045859;GO:0065009;GO:0046483;GO:0042325;GO:0042326;GO:0009607;GO:0009605;GO:0019538;GO:1900165;GO:0009894;GO:0009895;GO:0009892;GO:0009893;GO:0051222;GO:0071900;GO:0051224;GO:0050789;GO:0051348;GO:0002684;GO:0002682;GO:0002683;GO:0070201;GO:0098602;GO:0098609;GO:0043410;GO:0043412;GO:0002521;GO:0016070;GO:0016072;GO:0050710;GO:…	K14779	DDX52, ROK1	------	------	------	------	PF00270.26;PF00271.28	DEAD;Helicase_C	DEAD/DEAH box helicase;Helicase conserved C-terminal domain	cytoplasmic	8	25	67.5	High
Q9NVK5	FGFR1 oncogene partner 2 OS=Homo sapiens OX=9606 GN=FGFR1OP2 PE=1 SV=1	0.736356	-0.441525	0.0247	down	yes	0.877	1.191	BP:regulation of nucleobase-containing compound metabolic process;BP:regulation of primary metabolic process;BP:regulation of metabolic process;BP:phosphorylation;BP:regulation of cellular metabolic process;BP:peptidyl-tyrosine phosphorylation;BP:regulation of biological process;BP:cellular protein metabolic process;BP:cellular macromolecule metabolic process;BP:peptidyl-tyrosine modification;BP:…	GO:0019219;GO:0080090;GO:0019222;GO:0016310;GO:0031323;GO:0018108;GO:0050789;GO:0044267;GO:0044260;GO:0018212;GO:0009611;GO:0018193;GO:0006796;GO:0071704;GO:0065007;GO:0031326;GO:2000112;GO:0010468;GO:0006468;GO:0060255;GO:0009987;GO:0009889;GO:0006464;GO:0050794;GO:0006950;GO:0036211;GO:0008150;GO:1903506;GO:0008152;GO:2001141;GO:0042060;GO:0044238;GO:0019538;GO:0051252;GO:0043412;GO:0044237;GO:…	------	------	------	------	------	------	PF05769.8	DUF837	Protein of unknown function	cytoplasmic	1	3	29.4	Medium
P55036	26S proteasome non-ATPase regulatory subunit 4 OS=Homo sapiens OX=9606 GN=PSMD4 PE=1 SV=1	1.40559	0.49118	0.02697	up	yes	1.206	0.858	BP:cytokine-mediated signaling pathway;BP:negative regulation of response to stimulus;BP:positive regulation of response to stimulus;BP:regulation of response to stimulus;BP:positive regulation of defense response;BP:regulation of Wnt signaling pathway;BP:signal transduction;BP:cell surface receptor signaling pathway;BP:cellular component organization or biogenesis;BP:regulation of primary metabo…	GO:0019221;GO:0048585;GO:0048584;GO:0048583;GO:0031349;GO:0030111;GO:0007165;GO:0007166;GO:0071840;GO:0080090;GO:0044710;GO:0010605;GO:0019222;GO:0009968;GO:0009966;GO:0009967;GO:0000165;GO:0070646;GO:0032446;GO:0033238;GO:0044093;GO:0044092;GO:0048518;GO:0048519;GO:0043687;GO:0060255;GO:0050776;GO:0030162;GO:0030163;GO:0035567;GO:0070647;GO:0044248;GO:0002429;GO:0090175;GO:0019538;GO:0022402;GO:…	K03029	PSMD4, RPN10	hsa03050;hsa05169	Proteasome;Epstein-Barr virus infection	COG5148	O:Posttranslational modification, protein turnover, chaperones	PF13519.3;PF00092.25;PF04056.11;PF02809.17	VWA_2;VWA;Ssl1;UIM	von Willebrand factor type A domain;von Willebrand factor type A domain;Ssl1-like;Ubiquitin interaction motif	cytoplasmic	1	31	40.7	High
Q9Y3C0	WASH complex subunit 3 OS=Homo sapiens OX=9606 GN=WASHC3 PE=1 SV=1	1.34778	0.430581	0.04178	up	yes	1.182	0.877	BP:protein localization;BP:nucleic acid metabolic process;BP:nitrogen compound metabolic process;BP:maturation of LSU-rRNA;BP:ncRNA metabolic process;BP:organic cyclic compound metabolic process;BP:nucleobase-containing compound metabolic process;BP:cellular macromolecule metabolic process;BP:organic substance metabolic process;BP:rRNA processing;BP:organic substance transport;BP:macromolecule lo…	GO:0008104;GO:0090304;GO:0006807;GO:0000470;GO:0034660;GO:1901360;GO:0006139;GO:0044260;GO:0071704;GO:0006364;GO:0071702;GO:0033036;GO:0006810;GO:0034470;GO:0045184;GO:0009987;GO:0006725;GO:0000460;GO:0015031;GO:0008150;GO:0008152;GO:0051234;GO:0051179;GO:0046483;GO:0016070;GO:0044238;GO:0016072;GO:0034641;GO:0044237;GO:0043170;GO:0006396;GO:0015629;GO:1990904;GO:0030687;GO:0030684;GO:0043229;GO:…	K18463	CCDC53	hsa04144	Endocytosis	------	------	PF10152.6	DUF2360	Predicted coiled-coil domain-containing protein	cytoplasmic	1	7	21.2	High
Q7Z434	Mitochondrial antiviral-signaling protein OS=Homo sapiens OX=9606 GN=MAVS PE=1 SV=2	0.815256	-0.294675	0.04821	down	yes	0.9245	1.134	BP:regulation of intracellular protein transport;BP:positive regulation of intracellular transport;BP:regulation of primary metabolic process;BP:regulation of secretion;BP:positive regulation of secretion;BP:regulation of transport;BP:regulation of intracellular transport;BP:positive regulation of response to stimulus;BP:regulation of response to stimulus;BP:regulation of protein import into nucl…	GO:0033157;GO:0032388;GO:0080090;GO:0051046;GO:0051047;GO:0051049;GO:0032386;GO:0048584;GO:0048583;GO:0033158;GO:0031349;GO:0007165;GO:0007166;GO:0019220;GO:0031347;GO:0050688;GO:0051716;GO:0019222;GO:0043207;GO:0009966;GO:0009615;GO:0010033;GO:0044419;GO:1900063;GO:1904591;GO:0032728;GO:0048518;GO:0002682;GO:0043122;GO:0043123;GO:0098586;GO:0051050;GO:0060255;GO:0002697;GO:0051090;GO:0031401;GO:…	K12648	MAVS, IPS1	hsa04621;hsa04622;hsa04623;hsa05168;hsa05164;hsa05160;hsa05161;hsa05162	NOD-like receptor signaling pathway;RIG-I-like receptor signaling pathway;Cytosolic DNA-sensing pathway;Herpes simplex infection;Influenza A;Hepatitis C;Hepatitis B;Measles	------	------	PF16739.2	CARD_2	Caspase recruitment domain	cytoplasmic	9	45	56.5	High
Q07666	KH domain-containing, RNA-binding, signal transduction-associated protein 1 OS=Homo sapiens OX=9606 GN=KHDRBS1 PE=1 SV=1	1.25344	0.325888	0.01735	up	yes	1.14	0.9095	BP:positive regulation of intracellular transport;BP:regulation of primary metabolic process;BP:regulation of metabolic process;BP:G2/M transition of mitotic cell cycle;BP:regulation of mRNA processing;BP:regulation of intracellular transport;BP:positive regulation of response to stimulus;BP:regulation of response to stimulus;BP:signal transduction;BP:cell surface receptor signaling pathway;BP:or…	GO:0032388;GO:0080090;GO:0019222;GO:0000086;GO:0050684;GO:0032386;GO:0048584;GO:0048583;GO:0007165;GO:0007166;GO:1901362;GO:0071840;GO:0065003;GO:0010605;GO:0010604;GO:0009966;GO:0009967;GO:0051049;GO:0048518;GO:0048519;GO:0046483;GO:0051050;GO:0060255;GO:0006446;GO:0007283;GO:2001141;GO:0044702;GO:0022607;GO:0009892;GO:0009893;GO:0009890;GO:0009891;GO:1903651;GO:0006807;GO:0050789;GO:0097659;GO:…	K13198	KHDRBS1	------	------	COG5176	A:RNA processing and modification	PF16274.2;PF16568.2;PF00013.26	Qua1;Sam68-YY;KH_1	Qua1 domain;Tyrosine-rich domain of Sam68;KH domain	cytoplasmic	10	29	48.2	High
P26572	Alpha-1,3-mannosyl-glycoprotein 2-beta-N-acetylglucosaminyltransferase OS=Homo sapiens OX=9606 GN=MGAT1 PE=1 SV=2	0.799736	-0.322404	0.04776	down	yes	0.9085	1.136	BP:amino sugar catabolic process;BP:organic cyclic compound metabolic process;BP:organic cyclic compound catabolic process;BP:single-organism metabolic process;BP:heterocycle metabolic process;BP:UDP-N-acetylglucosamine catabolic process;BP:single-multicellular organism process;BP:protein metabolic process;BP:UDP-N-acetylglucosamine metabolic process;BP:amino sugar metabolic process;BP:aromatic c…	GO:0046348;GO:1901360;GO:1901361;GO:0044710;GO:0046483;GO:0006049;GO:0044707;GO:0019538;GO:0006047;GO:0006040;GO:0019439;GO:0006807;GO:0044267;GO:1901575;GO:0044260;GO:0044699;GO:0046700;GO:0043413;GO:0008150;GO:0008152;GO:0044723;GO:0034655;GO:0044270;GO:0043412;GO:0036211;GO:0044248;GO:0009790;GO:0034641;GO:0009792;GO:0006139;GO:0001701;GO:0009056;GO:0043009;GO:0032502;GO:0032501;GO:0009987;GO:…	K00726	MGAT1	hsa00510	N-Glycan biosynthesis	------	------	PF03071.12	GNT-I	GNT-I family	ER	2	6	50.8	High
Q9H900	Protein zwilch homolog OS=Homo sapiens OX=9606 GN=ZWILCH PE=1 SV=2	1.36824	0.452319	0.03766	up	yes	1.176	0.8595	BP:negative regulation of mitotic cell cycle;BP:mitotic cell cycle process;BP:cell cycle process;BP:cell division;BP:negative regulation of cellular process;BP:mitotic nuclear division;BP:cellular component organization or biogenesis;BP:sister chromatid cohesion;BP:regulation of mitotic cell cycle;BP:negative regulation of cell cycle;BP:cell cycle checkpoint;BP:nuclear division;BP:cellular compon…	GO:0045930;GO:1903047;GO:0022402;GO:0051301;GO:0048523;GO:0007067;GO:0071840;GO:0007062;GO:0007346;GO:0045786;GO:0000075;GO:0000280;GO:0016043;GO:0050789;GO:0044699;GO:0065007;GO:0007049;GO:0009987;GO:0050794;GO:0008150;GO:0048519;GO:0051276;GO:0006996;GO:0007030;GO:0051726;GO:1902589;GO:0048285;GO:0044763;GO:0007093;GO:0098687;GO:0043229;GO:0043228;GO:0043227;GO:0043226;GO:0044446;GO:0031090;GO:…	K11579	ZWILCH	------	------	------	------	PF09817.6	DUF2352	Uncharacterized conserved protein	cytoplasmic	4	12	67.2	High
F8VVM2	Phosphate carrier protein, mitochondrial OS=Homo sapiens OX=9606 GN=SLC25A3 PE=1 SV=1	0.679222	-0.558045	0.02975	down	yes	0.8205	1.208	BP:cellular process;BP:biological_process;BP:metabolic process;BP:cellular metabolic process;BP:translational initiation;CC:intracellular organelle;CC:membrane-bounded organelle;CC:organelle;CC:intrinsic component of membrane;CC:integral component of membrane;CC:membrane;CC:mitochondrion;CC:intracellular membrane-bounded organelle;CC:cell part;CC:cellular_component;CC:cytoplasmic part;CC:intracel…	GO:0009987;GO:0008150;GO:0008152;GO:0044237;GO:0006413;GO:0043229;GO:0043227;GO:0043226;GO:0031224;GO:0016021;GO:0016020;GO:0005739;GO:0043231;GO:0044464;GO:0005575;GO:0044444;GO:0044424;GO:0044425;GO:0003674;GO:0005488;GO:0003676;GO:1901363;GO:0008135;GO:0097159;GO:0003723;GO:0003743	------	------	------	------	------	------	PF00153.24	Mito_carr	Mitochondrial carrier protein	mitochondrial	1	50	36.1	High
Q9Y3C1	Nucleolar protein 16 OS=Homo sapiens OX=9606 GN=NOP16 PE=1 SV=2	0.820594	-0.28526	0.03494	down	yes	0.9125	1.112	BP:protein localization;BP:cellular component organization or biogenesis;BP:ribosomal large subunit biogenesis;BP:organic substance transport;BP:ribonucleoprotein complex biogenesis;BP:macromolecule localization;BP:transport;BP:establishment of protein localization;BP:protein transport;BP:biological_process;BP:establishment of localization;BP:localization;BP:cellular component biogenesis;CC:intra…	GO:0008104;GO:0071840;GO:0042273;GO:0071702;GO:0022613;GO:0033036;GO:0006810;GO:0045184;GO:0015031;GO:0008150;GO:0051234;GO:0051179;GO:0044085;GO:0043229;GO:0043228;GO:0043227;GO:0043226;GO:0005575;GO:0005730;GO:0005773;GO:0005634;GO:0043234;GO:0032991;GO:0043231;GO:0043232;GO:0044464;GO:0044446;GO:0044444;GO:0044428;GO:0044424;GO:0071203;GO:0005768;GO:0005769;GO:0044422;GO:0003674;GO:0005488;GO:…	------	------	------	------	------	------	PF09420.7	Nop16	Ribosome biogenesis protein Nop16	cytoplasmic	8	51	21.2	High
Q9NXG2	THUMP domain-containing protein 1 OS=Homo sapiens OX=9606 GN=THUMPD1 PE=1 SV=2	1.21433	0.280155	0.03993	up	yes	1.102	0.9075	BP:protein localization;BP:tRNA processing;BP:RNA modification;BP:nucleic acid metabolic process;BP:cellular nitrogen compound metabolic process;BP:nitrogen compound metabolic process;BP:cellular localization;BP:cellular component organization or biogenesis;BP:ncRNA metabolic process;BP:centriole-centriole cohesion;BP:organic cyclic compound metabolic process;BP:cellular component organization;BP…	GO:0008104;GO:0008033;GO:0009451;GO:0090304;GO:0034641;GO:0006807;GO:0051641;GO:0071840;GO:0034660;GO:0010457;GO:1901360;GO:0016043;GO:0006399;GO:0044260;GO:0070727;GO:0046483;GO:0071704;GO:0006364;GO:0006400;GO:0034613;GO:0006996;GO:0031023;GO:0034470;GO:0006139;GO:0051297;GO:0009987;GO:0006725;GO:0016072;GO:0043412;GO:0008150;GO:0008152;GO:0051179;GO:0016070;GO:0044238;GO:0033036;GO:0000154;GO:…	K06963	TAN1, THUMPD1	------	------	COG1818	R:General function prediction only	PF02926.14	THUMP	THUMP domain	cytoplasmic	4	14	39.3	High
Q8WV19	Vesicle transport protein SFT2A OS=Homo sapiens OX=9606 GN=SFT2D1 PE=1 SV=1	0.782609	-0.353637	0.01194	down	yes	0.882	1.127	BP:primary metabolic process;BP:metabolic process;BP:nucleobase-containing compound metabolic process;BP:nucleic acid metabolic process;BP:cellular nitrogen compound metabolic process;BP:protein localization;BP:organic substance metabolic process;BP:RNA processing;BP:protein modification by small protein conjugation or removal;BP:protein modification by small protein conjugation;BP:organic cyclic…	GO:0044238;GO:0008152;GO:0006139;GO:0090304;GO:0034641;GO:0008104;GO:0071704;GO:0006396;GO:0070647;GO:0032446;GO:1901360;GO:0071702;GO:0033036;GO:0043687;GO:0008380;GO:0016070;GO:0009987;GO:0044267;GO:0006810;GO:0006725;GO:0006464;GO:0044260;GO:0045184;GO:0015031;GO:0043412;GO:0036211;GO:0008150;GO:0051234;GO:0051179;GO:0046483;GO:0016192;GO:0019538;GO:0044237;GO:0043170;GO:0016567;GO:0006807;GO:…	------	------	------	------	COG5102	U:Intracellular trafficking, secretion, and vesicular transport	PF04178.9	Got1	Got1/Sft2-like family	cytoplasmic	1	17	17.8	High
Q9H7B2	Ribosome production factor 2 homolog OS=Homo sapiens OX=9606 GN=RPF2 PE=1 SV=2	0.828011	-0.272278	0.02349	down	yes	0.9075	1.096	BP:protein localization;BP:regulation of response to stimulus;BP:establishment of tissue polarity;BP:cellular component morphogenesis;BP:cellular component organization or biogenesis;BP:cellular macromolecule localization;BP:regulation of signal transduction;BP:cellular developmental process;BP:kidney development;BP:animal organ development;BP:regulation of signal transduction by p53 class mediat…	GO:0008104;GO:0048583;GO:0007164;GO:0032989;GO:0071840;GO:0070727;GO:0009966;GO:0048869;GO:0001822;GO:0048513;GO:1901796;GO:0033036;GO:0034470;GO:0000463;GO:0046483;GO:0022607;GO:0003281;GO:0000470;GO:0034660;GO:0000027;GO:0009653;GO:0044260;GO:0001568;GO:0042254;GO:0016043;GO:0065003;GO:0065007;GO:0006364;GO:0060271;GO:0050794;GO:0008150;GO:0008152;GO:1902531;GO:0016070;GO:0042733;GO:0016072;GO:…	K14847	RPF2	------	------	COG5106	S:Function unknown	PF04427.15	Brix	Brix domain	cytoplasmic	10	38	35.6	High
Q5LJA5	Ubiquitin carboxyl-terminal hydrolase OS=Homo sapiens OX=9606 GN=UCHL5 PE=1 SV=1	1.29513	0.373096	0.0487	up	yes	1.13	0.8725	BP:primary metabolic process;BP:macromolecule catabolic process;BP:cellular protein metabolic process;BP:cellular catabolic process;BP:ubiquitin-dependent protein catabolic process;BP:macromolecule metabolic process;BP:modification-dependent macromolecule catabolic process;BP:organic substance catabolic process;BP:cellular macromolecule catabolic process;BP:cellular macromolecule metabolic proces…	GO:0044238;GO:0009057;GO:0044267;GO:0044248;GO:0006511;GO:0043170;GO:0043632;GO:1901575;GO:0044265;GO:0044260;GO:0071704;GO:0070647;GO:0070646;GO:0006508;GO:0016579;GO:0008150;GO:0009987;GO:0019941;GO:0006464;GO:0043412;GO:0036211;GO:0008152;GO:0009056;GO:0051603;GO:0019538;GO:0044237;GO:0033202;GO:0031011;GO:0043229;GO:0043227;GO:0043226;GO:0005575;GO:0070603;GO:0005739;GO:0005654;GO:0044454;GO:…	------	------	------	------	------	------	PF01088.18	Peptidase_C12	Ubiquitin carboxyl-terminal hydrolase, family 1	cytoplasmic	1	45	40.4	High
C9J7I0	UBAP1-MVB12-associated (UMA)-domain containing protein 1 OS=Homo sapiens OX=9606 GN=UMAD1 PE=2 SV=2	1.21758	0.284022	0.01364	up	yes	1.094	0.8985	------	------	------	------	------	------	------	------	------	------	------	cytoplasmic	1	17	15.2	Medium
Q9NYK5	39S ribosomal protein L39, mitochondrial OS=Homo sapiens OX=9606 GN=MRPL39 PE=1 SV=3	0.824125	-0.279065	0.03149	down	yes	0.895	1.086	BP:regulation of peptide transport;BP:regulation of intracellular protein transport;BP:MyD88-dependent toll-like receptor signaling pathway;BP:positive regulation of intracellular transport;BP:regulation of metabolic process;BP:regulation of transport;BP:regulation of intracellular transport;BP:positive regulation of response to stimulus;BP:regulation of response to stimulus;BP:positive regulatio…	GO:0090087;GO:0033157;GO:0002755;GO:0032388;GO:0019222;GO:0051049;GO:0032386;GO:0048584;GO:0048583;GO:0031349;GO:0042035;GO:0044281;GO:1901360;GO:0080090;GO:0032268;GO:0044710;GO:0050729;GO:0000002;GO:0043207;GO:0009966;GO:0009967;GO:0050727;GO:0009612;GO:1904591;GO:0032728;GO:0032729;GO:0048518;GO:0002682;GO:0051704;GO:0032722;GO:0043122;GO:0043123;GO:0042325;GO:0045416;GO:0051050;GO:0060255;GO:…	K17420	MRPL39	------	------	COG0441	J:Translation, ribosomal structure and biogenesis	------	------	------	mitochondrial	6	30	38.7	High
O15084	Serine/threonine-protein phosphatase 6 regulatory ankyrin repeat subunit A OS=Homo sapiens OX=9606 GN=ANKRD28 PE=1 SV=5	1.2346	0.304039	0.03163	up	yes	1.092	0.8845	BP:COPII vesicle coating;BP:macromolecular complex subunit organization;BP:macromolecular complex assembly;BP:cellular component organization or biogenesis;BP:protein complex subunit organization;BP:cellular component organization;BP:protein complex assembly;BP:cellular component assembly;BP:vesicle coating;BP:biological_process;BP:organelle organization;BP:vesicle organization;BP:cellular proces…	GO:0048208;GO:0043933;GO:0065003;GO:0071840;GO:0071822;GO:0016043;GO:0006461;GO:0022607;GO:0006901;GO:0008150;GO:0006996;GO:0016050;GO:0009987;GO:0098590;GO:0016020;GO:0030427;GO:0030426;GO:0043229;GO:0043228;GO:0043227;GO:0043226;GO:0005737;GO:0044446;GO:0031090;GO:0005634;GO:0048786;GO:0005654;GO:0097458;GO:0044431;GO:0044456;GO:0030054;GO:0097060;GO:0044459;GO:0005856;GO:0098588;GO:0098589;GO:…	K15502	ANKRD28	------	------	COG0666	R:General function prediction only	PF12796.4;PF13637.3;PF00023.27;PF13857.3;PF13606.3	Ank_2;Ank_4;Ank;Ank_5;Ank_3	Ankyrin repeats;Ankyrin repeats;Ankyrin repeat;Ankyrin repeats;Ankyrin repeat	cytoplasmic	5	9	112.9	High
P61224	Ras-related protein Rap-1b OS=Homo sapiens OX=9606 GN=RAP1B PE=1 SV=1	1.31925	0.399717	0.005943	up	yes	1.124	0.852	BP:regulation of phosphate metabolic process;BP:cytokine-mediated signaling pathway;BP:regulation of secretion;BP:regulation of ERK1 and ERK2 cascade;BP:negative regulation of secretion;BP:regulation of transport;BP:regulation of intracellular transport;BP:positive regulation of response to stimulus;BP:cell development;BP:negative regulation of synaptic vesicle exocytosis;BP:signal transduction;B…	GO:0019220;GO:0019221;GO:0051046;GO:0070372;GO:0051048;GO:0051049;GO:0032386;GO:0048584;GO:0048468;GO:2000301;GO:0007165;GO:0007166;GO:0045055;GO:0071840;GO:0080090;GO:0010648;GO:0051716;GO:0009966;GO:0048869;GO:0071310;GO:0009967;GO:0048518;GO:0002064;GO:0032387;GO:0051051;GO:1901888;GO:0060255;GO:0048583;GO:0042327;GO:0051591;GO:0002275;GO:0043434;GO:0050804;GO:0010033;GO:0042325;GO:0065008;GO:…	K07836	RAP1B	hsa04972;hsa04611;hsa05211;hsa04024;hsa04670;hsa04720;hsa04015;hsa04014;hsa04510;hsa04010;hsa04722;hsa04062	Pancreatic secretion;Platelet activation;Renal cell carcinoma;cAMP signaling pathway;Leukocyte transendothelial migration;Long-term potentiation;Rap1 signaling pathway;Ras signaling pathway;Focal adhesion;MAPK signaling pathway;Neurotrophin signaling pathway;Chemokine signaling pathway	COG1100	R:General function prediction only	PF00071.19;PF08477.10;PF00025.18	Ras;Roc;Arf	Ras family;Ras of Complex, Roc, domain of DAPkinase;ADP-ribosylation factor family	cytoplasmic	3	60	20.8	High
Q8WXF1	Paraspeckle component 1 OS=Homo sapiens OX=9606 GN=PSPC1 PE=1 SV=1	1.25385	0.326365	0.02441	up	yes	1.099	0.8765	BP:spliceosomal tri-snRNP complex assembly;BP:regulation of primary metabolic process;BP:regulation of metabolic process;BP:regulation of mRNA processing;BP:negative regulation of mRNA processing;BP:regulation of response to stimulus;BP:RNA splicing, via transesterification reactions with bulged adenosine as nucleophile;BP:positive regulation of defense response;BP:organic cyclic compound biosynt…	GO:0000244;GO:0080090;GO:0019222;GO:0050684;GO:0050686;GO:0048583;GO:0000377;GO:0031349;GO:1901362;GO:0071840;GO:0065003;GO:0010605;GO:0048511;GO:0048518;GO:0048519;GO:0048584;GO:0060255;GO:0042752;GO:2001141;GO:0046483;GO:0000395;GO:0000398;GO:0002376;GO:0019438;GO:0022607;GO:0009892;GO:0009890;GO:0050778;GO:0010629;GO:0045088;GO:1901576;GO:0000387;GO:0000381;GO:0044260;GO:0016043;GO:0002684;GO:…	------	------	------	------	------	------	PF00076.19;PF08075.8	RRM_1;NOPS	RNA recognition motif.;NOPS	cytoplasmic	7	17	58.7	High
G8JLB6	Heterogeneous nuclear ribonucleoprotein H OS=Homo sapiens OX=9606 GN=HNRNPH1 PE=1 SV=1	1.21979	0.286629	0.001208	up	yes	1.085	0.8895	BP:regulation of RNA splicing;BP:regulation of nucleobase-containing compound metabolic process;BP:regulation of primary metabolic process;BP:regulation of metabolic process;BP:regulation of cellular metabolic process;BP:RNA modification;BP:nucleic acid metabolic process;BP:cellular nitrogen compound metabolic process;BP:nitrogen compound metabolic process;BP:ncRNA metabolic process;BP:organic cy…	GO:0043484;GO:0019219;GO:0080090;GO:0019222;GO:0031323;GO:0009451;GO:0090304;GO:0034641;GO:0006807;GO:0034660;GO:1901360;GO:0006139;GO:0044260;GO:0001522;GO:0050789;GO:0071704;GO:0065007;GO:0010468;GO:0008033;GO:0060255;GO:0009987;GO:0006725;GO:0050794;GO:0043412;GO:0008150;GO:0051171;GO:0008152;GO:0046483;GO:0016070;GO:0044238;GO:0051252;GO:0044237;GO:0043170;GO:0006399;GO:0034470;GO:0006396;GO:…	------	------	------	------	------	------	PF00076.19;PF08080.9	RRM_1;zf-RNPHF	RNA recognition motif.;RNPHF zinc finger	cytoplasmic	8	51	51.2	High
Q96CW5	Gamma-tubulin complex component 3 OS=Homo sapiens OX=9606 GN=TUBGCP3 PE=1 SV=2	1.28389	0.360525	0.04458	up	yes	1.108	0.863	BP:regulation of microtubule polymerization or depolymerization;BP:negative regulation of microtubule polymerization or depolymerization;BP:antigen processing and presentation of peptide antigen via MHC class II;BP:protein localization;BP:regulation of microtubule depolymerization;BP:regulation of response to stimulus;BP:membrane organization;BP:interphase microtubule nucleation by interphase mic…	GO:0031110;GO:0031111;GO:0002495;GO:0008104;GO:0031114;GO:0048583;GO:0061024;GO:0051415;GO:0007165;GO:0007166;GO:0007167;GO:0044707;GO:0071840;GO:0051418;GO:0051494;GO:0051493;GO:0048519;GO:0033036;GO:0051298;GO:1901880;GO:0045184;GO:0030163;GO:0035567;GO:0002504;GO:0044702;GO:0016192;GO:0019538;GO:0016055;GO:0010639;GO:0050789;GO:0070507;GO:0022607;GO:0032799;GO:0022603;GO:0009566;GO:1901879;GO:…	K16570	TUBGCP3, GCP3	------	------	------	------	PF04130.10	Spc97_Spc98	Spc97 / Spc98 family	cytoplasmic	4	8	103.5	High
P51970	NADH dehydrogenase [ubiquinone] 1 alpha subcomplex subunit 8 OS=Homo sapiens OX=9606 GN=NDUFA8 PE=1 SV=3	0.722028	-0.469873	0.0369	down	yes	0.826	1.144	BP:cellular component assembly;BP:protein complex biogenesis;BP:macromolecular complex subunit organization;BP:cellular macromolecular complex assembly;BP:generation of precursor metabolites and energy;BP:cellular component organization or biogenesis;BP:single-organism metabolic process;BP:protein complex subunit organization;BP:mitochondrial respiratory chain complex I assembly;BP:NADH dehydroge…	GO:0022607;GO:0070271;GO:0043933;GO:0034622;GO:0006091;GO:0071840;GO:0044710;GO:0071822;GO:0032981;GO:0010257;GO:0016043;GO:0065003;GO:0044699;GO:0022900;GO:0022904;GO:0044237;GO:0044763;GO:0033108;GO:0009987;GO:0006461;GO:0008150;GO:0008152;GO:0043623;GO:0055114;GO:0097031;GO:0044085;GO:0006120;GO:1990904;GO:0031970;GO:0031974;GO:1990204;GO:0043229;GO:0005739;GO:0030529;GO:0043227;GO:0044446;GO:…	K03952	NDUFA8	hsa00190;hsa04723;hsa04932;hsa05016;hsa05010;hsa05012	Oxidative phosphorylation;Retrograde endocannabinoid signaling;Non-alcoholic fatty liver diseas;Huntington's disease;Alzheimer's disease;Parkinson's disease	------	------	PF06747.10	CHCH	CHCH domain	cytoplasmic	3	29	20.1	High
P80723	Brain acid soluble protein 1 OS=Homo sapiens OX=9606 GN=BASP1 PE=1 SV=2	1.26663	0.340993	0.03662	up	yes	1.095	0.8645	BP:regulation of primary metabolic process;BP:regulation of metabolic process;BP:cellular component morphogenesis;BP:muscle organ development;BP:glomerular visceral epithelial cell differentiation;BP:negative regulation of macromolecule metabolic process;BP:cellular developmental process;BP:cellular component organization or biogenesis;BP:animal organ development;BP:epithelial cell differentiatio…	GO:0080090;GO:0019222;GO:0032989;GO:0007517;GO:0072112;GO:0010605;GO:0048869;GO:0071840;GO:0048513;GO:0030855;GO:0048518;GO:0048519;GO:0060255;GO:0003006;GO:2001141;GO:0044702;GO:0044707;GO:0010468;GO:0051252;GO:0009892;GO:0003382;GO:0009890;GO:0022603;GO:0072216;GO:0090184;GO:0090183;GO:0050789;GO:0000902;GO:0008406;GO:0016043;GO:0019219;GO:0061318;GO:0065007;GO:0035850;GO:0060231;GO:0050793;GO:…	K17272	BASP1	------	------	------	------	PF05466.9	BASP1	Brain acid soluble protein 1	cytoplasmic	16	85	22.7	High
O43181	NADH dehydrogenase [ubiquinone] iron-sulfur protein 4, mitochondrial OS=Homo sapiens OX=9606 GN=NDUFS4 PE=1 SV=1	0.736702	-0.440847	0.0289	down	yes	0.831	1.128	BP:regulation of phosphate metabolic process;BP:regulation of primary metabolic process;BP:regulation of metabolic process;BP:small molecule metabolic process;BP:small molecule biosynthetic process;BP:cellular component organization or biogenesis;BP:single-organism metabolic process;BP:single-organism biosynthetic process;BP:NADH dehydrogenase complex assembly;BP:electron transport chain;BP:respi…	GO:0019220;GO:0080090;GO:0019222;GO:0044281;GO:0044283;GO:0071840;GO:0044710;GO:0044711;GO:0010257;GO:0022900;GO:0022904;GO:0048518;GO:0042127;GO:0042325;GO:0060255;GO:0051591;GO:0043436;GO:1901564;GO:0009070;GO:0010033;GO:0055114;GO:1901566;GO:0016053;GO:0007165;GO:0022607;GO:0019935;GO:0006807;GO:0019932;GO:0019933;GO:0035556;GO:1901576;GO:0006564;GO:0006563;GO:0016043;GO:0065003;GO:0065007;GO:…	K03937	NDUFS4	hsa00190;hsa04723;hsa04932;hsa05016;hsa05010;hsa05012	Oxidative phosphorylation;Retrograde endocannabinoid signaling;Non-alcoholic fatty liver diseas;Huntington's disease;Alzheimer's disease;Parkinson's disease	------	------	PF04800.9	ETC_C1_NDUFA4	ETC complex I subunit conserved region	mitochondrial	1	9	20.1	High
Q9H204	Mediator of RNA polymerase II transcription subunit 28 OS=Homo sapiens OX=9606 GN=MED28 PE=1 SV=1	1.42839	0.514393	0.02257	up	yes	1.142	0.7995	BP:regulation of primary metabolic process;BP:regulation of metabolic process;BP:organic cyclic compound biosynthetic process;BP:single-multicellular organism process;BP:organic cyclic compound metabolic process;BP:negative regulation of biological process;BP:regulation of macromolecule metabolic process;BP:regulation of RNA biosynthetic process;BP:heterocycle metabolic process;BP:stem cell popul…	GO:0080090;GO:0019222;GO:1901362;GO:0044707;GO:1901360;GO:0048519;GO:0060255;GO:2001141;GO:0046483;GO:0019827;GO:0050789;GO:0097659;GO:1901576;GO:0044260;GO:0065007;GO:0018130;GO:0050793;GO:0009889;GO:0050794;GO:0098727;GO:0008150;GO:0008152;GO:0019438;GO:0034654;GO:0016070;GO:0044271;GO:0006355;GO:0010556;GO:0006351;GO:0032774;GO:0044249;GO:0034641;GO:0034645;GO:0044699;GO:0006139;GO:0032502;GO:…	K15141	MED28	------	------	------	------	PF11594.5	Med28	Mediator complex subunit 28	cytoplasmic	1	15	19.5	High
P04004	Vitronectin OS=Homo sapiens OX=9606 GN=VTN PE=1 SV=1	0.584559	-0.77458	0.009033	down	yes	0.7155	1.224	BP:primary metabolic process;BP:regulation of phosphate metabolic process;BP:regulation of primary metabolic process;BP:regulation of metabolic process;BP:regulation of transport;BP:negative regulation of response to stimulus;BP:positive regulation of response to stimulus;BP:regulation of response to stimulus;BP:cell-matrix adhesion;BP:regulation of lymphocyte mediated immunity;BP:negative regula…	GO:0044238;GO:0019220;GO:0080090;GO:0019222;GO:0051049;GO:0048585;GO:0048584;GO:0048583;GO:0007160;GO:0002706;GO:0050819;GO:0002704;GO:0002703;GO:0016043;GO:0048260;GO:0031347;GO:0044710;GO:0010605;GO:0061302;GO:0045785;GO:0009966;GO:0009967;GO:0071840;GO:0050727;GO:0048513;GO:0044093;GO:0044092;GO:0048518;GO:0065007;GO:0034622;GO:0016192;GO:0010604;GO:2000258;GO:0031589;GO:0051050;GO:0060255;GO:…	K06251	VTN	hsa05205;hsa04512;hsa04610;hsa04510;hsa04151	Proteoglycans in cancer;ECM-receptor interaction;Complement and coagulation cascades;Focal adhesion;PI3K-Akt signaling pathway	------	------	PF00045.16;PF01033.14	Hemopexin;Somatomedin_B	Hemopexin;Somatomedin B domain	ER	3	10	54.3	High
P12814	Alpha-actinin-1 OS=Homo sapiens OX=9606 GN=ACTN1 PE=1 SV=2	1.20114	0.2644	0.03766	up	yes	1.057	0.88	BP:fat cell differentiation;BP:regulation of primary metabolic process;BP:regulation of metabolic process;BP:single organism cell adhesion;BP:regulation of RNA biosynthetic process;BP:cell development;BP:platelet formation;BP:positive regulation of nitrogen compound metabolic process;BP:myotube cell development;BP:cell chemotaxis;BP:cell-substrate junction assembly;BP:cellular component morphogen…	GO:0045444;GO:0080090;GO:0019222;GO:0098602;GO:2001141;GO:0048468;GO:0030220;GO:0051173;GO:0014904;GO:0060326;GO:0007044;GO:0032989;GO:0051716;GO:0045786;GO:0010604;GO:0042330;GO:0048869;GO:0070848;GO:0016192;GO:0001936;GO:0010466;GO:0044092;GO:0043281;GO:0048519;GO:0007010;GO:0042127;GO:0022607;GO:0006935;GO:0060548;GO:0043534;GO:0030162;GO:0050678;GO:0043434;GO:0010035;GO:0010033;GO:0030168;GO:…	K05699	ACTN1_4	hsa05322;hsa05203;hsa04530;hsa04670;hsa05146;hsa04510;hsa04520;hsa04810	Systemic lupus erythematosus;Viral carcinogenesis;Tight junction;Leukocyte transendothelial migration;Amoebiasis;Focal adhesion;Adherens junction;Regulation of actin cytoskeleton	COG5069	Z:Cytoskeleton	PF00435.18;PF00307.28;PF08726.7;PF00036.29;PF13405.3;PF11971.5;PF13499.3	Spectrin;CH;EFhand_Ca_insen;EF-hand_1;EF-hand_6;CAMSAP_CH;EF-hand_7	Spectrin repeat;Calponin homology;Ca2+ insensitive EF hand;EF hand;EF-hand domain;CAMSAP CH domain;EF-hand domain pair	cytoplasmic	6	69	103	High
O43306	Adenylate cyclase type 6 OS=Homo sapiens OX=9606 GN=ADCY6 PE=1 SV=2	1.27991	0.356038	0.03185	up	yes	1.086	0.8485	BP:regulation of phosphate metabolic process;BP:regulation of primary metabolic process;BP:regulation of metabolic process;BP:activation of protein kinase activity;BP:circulatory system process;BP:renal system process;BP:signal transduction;BP:activation of protein kinase A activity;BP:vascular process in circulatory system;BP:organic cyclic compound biosynthetic process;BP:organic cyclic compoun…	GO:0019220;GO:0080090;GO:0019222;GO:0032147;GO:0003013;GO:0003014;GO:0007165;GO:0034199;GO:0003018;GO:1901362;GO:1901360;GO:0051716;GO:0044711;GO:0010604;GO:0007212;GO:0003091;GO:0052652;GO:0045665;GO:0045664;GO:0034694;GO:0034695;GO:0044093;GO:0010721;GO:0048518;GO:0048519;GO:0009190;GO:0006171;GO:0060255;GO:0045859;GO:0010977;GO:0051129;GO:0010975;GO:0043434;GO:0031279;GO:0010033;GO:0003008;GO:…	K08046	ADCY6	hsa04611;hsa04022;hsa04024;hsa04723;hsa04725;hsa04742;hsa04727;hsa04925;hsa04924;hsa04062;hsa04921;hsa04962;hsa04961;hsa04923;hsa01522;hsa04211;hsa04213;hsa04270;hsa04540;hsa04371;hsa05200;hsa04114;hsa04912;hsa04913;hsa04015;hsa04072;hsa04750;hsa04914;hsa04915;hsa04918;hsa04713;hsa05414;hsa05166;hsa04970;hsa04971;hsa04972;hsa04976;hsa05032;hsa04911;hsa00230;hsa04916;hsa04261;hsa04724	Platelet activation;cGMP-PKG signaling pathway;cAMP signaling pathway;Retrograde endocannabinoid signaling;Cholinergic synapse;Taste transduction;GABAergic synapse;Aldosterone synthesis and secretion;Renin secretion;Chemokine signaling pathway;Oxytocin signaling pathway;Vasopressin-regulated water reabsorption;Endocrine and other factor-regulated calcium reabsorption;Regulation of lipolysis in ad…	COG2114	T:Signal transduction mechanisms	PF16214.2;PF00211.17;PF06327.11	AC_N;Guanylate_cyc;DUF1053	Adenylyl cyclase N-terminal extracellular and transmembrane region;Adenylate and Guanylate cyclase catalytic domain;Domain of Unknown Function	cytoplasmic	2	4	130.5	High
P23246	Splicing factor, proline- and glutamine-rich OS=Homo sapiens OX=9606 GN=SFPQ PE=1 SV=2	1.22811	0.29644	0.005515	up	yes	1.066	0.868	BP:positive regulation of apoptotic signaling pathway;BP:regulation of primary metabolic process;BP:regulation of metabolic process;BP:regulation of apoptotic signaling pathway;BP:positive regulation of response to stimulus;BP:regulation of response to stimulus;BP:protein deacetylation;BP:positive regulation of defense response;BP:organic substance biosynthetic process;BP:organic cyclic compound …	GO:2001235;GO:0080090;GO:0019222;GO:2001233;GO:0048584;GO:0048583;GO:0006476;GO:0031349;GO:1901576;GO:1901362;GO:1901360;GO:0070932;GO:0044710;GO:0010605;GO:0045787;GO:0009966;GO:0009967;GO:0071840;GO:0048511;GO:1903201;GO:0048518;GO:0002682;GO:1903209;GO:0016570;GO:0006281;GO:0060255;GO:0042752;GO:1900407;GO:0042754;GO:1900409;GO:2001141;GO:0046483;GO:0019538;GO:0010638;GO:0034641;GO:0000398;GO:…	K13219	SFPQ, PSF	------	------	------	------	PF00076.19;PF08075.8	RRM_1;NOPS	RNA recognition motif.;NOPS	cytoplasmic	22	35	76.1	High
P24390	ER lumen protein-retaining receptor 1 OS=Homo sapiens OX=9606 GN=KDELR1 PE=1 SV=1	1.42749	0.513481	0.02059	up	yes	1.132	0.793	BP:protein localization;BP:T cell apoptotic process;BP:T cell mediated immunity;BP:maintenance of location in cell;BP:hormone metabolic process;BP:hormone biosynthetic process;BP:cellular developmental process;BP:macromolecule localization;BP:T cell differentiation;BP:lymphocyte apoptotic process;BP:establishment of protein localization;BP:maintenance of protein location;BP:lymphocyte activation;…	GO:0008104;GO:0070231;GO:0002456;GO:0051651;GO:0042445;GO:0042446;GO:0048869;GO:0033036;GO:0030217;GO:0070227;GO:0045184;GO:0045185;GO:0046649;GO:0016192;GO:0071593;GO:0044707;GO:0002376;GO:0045321;GO:0051220;GO:0006888;GO:0006886;GO:0002367;GO:0065007;GO:0044699;GO:0065008;GO:0002369;GO:0098602;GO:0098609;GO:0006810;GO:0006621;GO:0012501;GO:0001775;GO:0008150;GO:0006955;GO:0051235;GO:0051234;GO:…	K10949	KDELR	hsa05110	Vibrio cholerae infection	COG5196	U:Intracellular trafficking, secretion, and vesicular transport	PF00810.15	ER_lumen_recept	ER lumen protein retaining receptor	ER	1	9	24.5	High
Q9NR28	Diablo homolog, mitochondrial OS=Homo sapiens OX=9606 GN=DIABLO PE=1 SV=1	0.782931	-0.353042	0.01543	down	yes	0.844	1.078	BP:regulation of phosphate metabolic process;BP:regulation of primary metabolic process;BP:regulation of metabolic process;BP:positive regulation of response to stimulus;BP:cell development;BP:zymogen activation;BP:skeletal system development;BP:signal transduction;BP:primitive streak formation;BP:positive regulation of macromolecule metabolic process;BP:negative regulation of signal transduction…	GO:0019220;GO:0080090;GO:0019222;GO:0048584;GO:0048468;GO:0031638;GO:0001501;GO:0007165;GO:0090009;GO:0010604;GO:0009968;GO:0009966;GO:0048869;GO:0048513;GO:0030856;GO:0030857;GO:0044093;GO:0045662;GO:0048518;GO:0048519;GO:0048585;GO:0060255;GO:0048583;GO:0030162;GO:2001141;GO:0030514;GO:0030510;GO:0042325;GO:0042327;GO:0044707;GO:0023057;GO:0019538;GO:0060395;GO:0031667;GO:0060393;GO:0009893;GO:…	K10522	DIABLO, SMAC	hsa04210;hsa04215	Apoptosis;Apoptosis - multiple species	------	------	PF09057.7	Smac_DIABLO	Second Mitochondria-derived Activator of Caspases	mitochondrial	9	49	27.1	High
Q5GLZ8	Probable E3 ubiquitin-protein ligase HERC4 OS=Homo sapiens OX=9606 GN=HERC4 PE=1 SV=1	1.20252	0.266066	0.000845	up	yes	1.048	0.8715	BP:primary metabolic process;BP:cell differentiation;BP:gamete generation;BP:cellular macromolecule metabolic process;BP:organic substance metabolic process;BP:cellular developmental process;BP:protein modification by small protein conjugation or removal;BP:protein modification by small protein conjugation;BP:protein ubiquitination involved in ubiquitin-dependent protein catabolic process;BP:sing…	GO:0044238;GO:0030154;GO:0007276;GO:0044260;GO:0071704;GO:0048869;GO:0070647;GO:0032446;GO:0042787;GO:0044699;GO:0032502;GO:0048609;GO:0044267;GO:0009987;GO:0006464;GO:0044767;GO:0007283;GO:0036211;GO:0008150;GO:0008152;GO:0048232;GO:0044702;GO:0022414;GO:0019538;GO:0043412;GO:0044237;GO:0043170;GO:0016567;GO:0044763;GO:0043229;GO:0043226;GO:0005737;GO:0044446;GO:0005634;GO:0044452;GO:0043227;GO:…	K10615	HERC4	hsa04120	Ubiquitin mediated proteolysis	COG5021;COG5184;COG5184	O:Posttranslational modification, protein turnover, chaperones;D:Cell cycle control, cell division, chromosome partitioning;Z:Cytoskeleton	PF00415.15;PF00632.22;PF13540.3	RCC1;HECT;RCC1_2	Regulator of chromosome condensation;HECT-domain;Regulator of chromosome condensation	cytoplasmic	2	4	118.5	High
Q16611	Bcl-2 homologous antagonist/killer OS=Homo sapiens OX=9606 GN=BAK1 PE=1 SV=1	0.770295	-0.376517	0.04179	down	yes	0.835	1.084	BP:regulation of transport;BP:ossification;BP:inorganic ion homeostasis;BP:positive regulation of intracellular transport;BP:response to mycotoxin;BP:cellular response to stimulus;BP:response to external biotic stimulus;BP:genitalia development;BP:negative regulation of response to stimulus;BP:regulation of type 2 immune response;BP:animal organ regeneration;BP:regulation of protein kinase activi…	GO:0051049;GO:0001503;GO:0098771;GO:0032388;GO:0010046;GO:0051716;GO:0043207;GO:0048806;GO:0048585;GO:0002828;GO:0031100;GO:0045859;GO:0042325;GO:0042327;GO:0042326;GO:0009607;GO:0009605;GO:0019538;GO:0010638;GO:1903896;GO:1903894;GO:0048563;GO:0009892;GO:0009893;GO:0000302;GO:1901342;GO:0090559;GO:0060068;GO:0050789;GO:0051347;GO:0051346;GO:0051345;GO:0006887;GO:2000401;GO:0002685;GO:0002682;GO:…	K14021	BAK, BAK1	hsa05206;hsa01524;hsa05203;hsa04141;hsa04210;hsa04215	MicroRNAs in cancer;Platinum drug resistance;Viral carcinogenesis;Protein processing in endoplasmic reticulum;Apoptosis;Apoptosis - multiple species	------	------	PF00452.16	Bcl-2	Apoptosis regulator proteins, Bcl-2 family	cytoplasmic	3	33	23.4	High
A0A2R8YHD2	Tropomyosin alpha-4 chain (Fragment) OS=Homo sapiens OX=9606 GN=TPM4 PE=1 SV=2	1.21363	0.279324	0.008641	up	yes	1.051	0.866	------	------	------	------	------	------	------	------	PF00261.17;PF12718.4;PF06009.9	Tropomyosin;Tropomyosin_1;Laminin_II	Tropomyosin;Tropomyosin like;Laminin Domain II	cytoplasmic	5	57	28.7	High
C9JIZ6	Prosaposin OS=Homo sapiens OX=9606 GN=PSAP PE=1 SV=2	0.772263	-0.372835	0.03643	down	yes	0.8325	1.078	BP:regulation of phosphate metabolic process;BP:regulation of primary metabolic process;BP:developmental growth;BP:negative regulation of response to stimulus;BP:positive regulation of response to stimulus;BP:regulation of response to stimulus;BP:signal transduction;BP:organ growth;BP:cellular response to stimulus;BP:regulation of metabolic process;BP:regulation of signal transduction;BP:positive…	GO:0019220;GO:0080090;GO:0048589;GO:0048585;GO:0048584;GO:0048583;GO:0007165;GO:0035265;GO:0051716;GO:0019222;GO:0009966;GO:0009967;GO:0016192;GO:1903206;GO:1903205;GO:1903202;GO:0044093;GO:0030855;GO:0048518;GO:0006664;GO:0006665;GO:0006687;GO:0060255;GO:0060548;GO:0003006;GO:0032268;GO:0010033;GO:0002576;GO:0042325;GO:0042327;GO:0044702;GO:1901564;GO:0044707;GO:0009894;GO:0009893;GO:0006807;GO:…	K12382	PSAP, SGP1	hsa04142	Lysosome	------	------	PF05184.12;PF03489.14;PF02199.12	SapB_1;SapB_2;SapA	Saposin-like type B, region 1;Saposin-like type B, region 2;Saposin A-type domain	extracellular	17	36	58.4	High
Q15291	Retinoblastoma-binding protein 5 OS=Homo sapiens OX=9606 GN=RBBP5 PE=1 SV=2	0.822937	-0.281147	0.03643	no change	yes	0.8575	1.042	BP:protein methylation;BP:regulation of primary metabolic process;BP:regulation of metabolic process;BP:histone H3-K4 methylation;BP:organic cyclic compound biosynthetic process;BP:cellular component organization or biogenesis;BP:RNA biosynthetic process;BP:macromolecular complex assembly;BP:single-organism metabolic process;BP:peptidyl-amino acid modification;BP:biological regulation;BP:regulati…	GO:0006479;GO:0080090;GO:0019222;GO:0051568;GO:1901362;GO:0071840;GO:0032774;GO:0065003;GO:0044710;GO:0018193;GO:0065007;GO:0060255;GO:2001141;GO:1903706;GO:0010033;GO:0046483;GO:0018205;GO:0045652;GO:0000398;GO:0019538;GO:0033554;GO:0019438;GO:0016569;GO:0018022;GO:0044267;GO:0044260;GO:0016043;GO:0016571;GO:0016570;GO:0032259;GO:0018130;GO:0050793;GO:0009889;GO:0051716;GO:0050794;GO:0006950;GO:…	K14961	RBBP5, SWD1, CPS50	------	------	------	------	PF00400.29;PF12894.4	WD40;ANAPC4_WD40	WD domain, G-beta repeat;Anaphase-promoting complex subunit 4 WD40 domain	cytoplasmic	6	25	59.1	High
Q8N806	Putative E3 ubiquitin-protein ligase UBR7 OS=Homo sapiens OX=9606 GN=UBR7 PE=1 SV=2	1.4084	0.494054	0.03864	up	yes	1.107	0.786	BP:regulation of primary metabolic process;BP:regulation of metabolic process;BP:cellular component organization or biogenesis;BP:DNA methylation;BP:DNA alkylation;BP:DNA modification;BP:positive regulation of macromolecule metabolic process;BP:DNA methylation involved in embryo development;BP:protein modification by small protein conjugation or removal;BP:protein modification by small protein co…	GO:0080090;GO:0019222;GO:0071840;GO:0006306;GO:0006305;GO:0006304;GO:0010604;GO:0043045;GO:0070647;GO:0032446;GO:0048518;GO:0051054;GO:0051052;GO:0060255;GO:0046483;GO:0019538;GO:0016567;GO:0016569;GO:0009893;GO:0006807;GO:0044267;GO:0044260;GO:0016043;GO:0065007;GO:1901360;GO:0032259;GO:0006139;GO:0050794;GO:0043412;GO:0036211;GO:0043414;GO:0008152;GO:0044727;GO:0044728;GO:0008150;GO:0034641;GO:…	K11979	UBR7	------	------	------	------	PF02207.17	zf-UBR	Putative zinc finger in N-recognin	nuclear	1	3	48	High
Q13492	Phosphatidylinositol-binding clathrin assembly protein OS=Homo sapiens OX=9606 GN=PICALM PE=1 SV=2	1.25851	0.331714	0.04212	up	yes	1.054	0.8375	BP:regulation of transport;BP:vesicle coating;BP:clathrin coat assembly;BP:ossification;BP:regulation of neurotransmitter levels;BP:inorganic ion homeostasis;BP:positive regulation of receptor-mediated endocytosis;BP:negative regulation of receptor-mediated endocytosis;BP:macromolecular complex assembly;BP:modulation of age-related behavioral decline;BP:regulation of cytoskeleton organization;BP:…	GO:0051049;GO:0006901;GO:0048268;GO:0001503;GO:0001505;GO:0098771;GO:0048260;GO:0048261;GO:0065003;GO:0090647;GO:0051493;GO:1905049;GO:1905048;GO:0065009;GO:0009892;GO:0009893;GO:0009891;GO:0001952;GO:0051581;GO:0051580;GO:1903391;GO:0051589;GO:0051588;GO:0050789;GO:0051346;GO:0051345;GO:0070169;GO:2000370;GO:0070167;GO:0032956;GO:0050794;GO:0048813;GO:0048812;GO:1903729;GO:0034250;GO:0072583;GO:…	K20044	PICALM	------	------	------	------	PF07651.13;PF01417.17	ANTH;ENTH	ANTH domain;ENTH domain	cytoplasmic	8	23	70.7	High
P14866	Heterogeneous nuclear ribonucleoprotein L OS=Homo sapiens OX=9606 GN=HNRNPL PE=1 SV=2	1.31776	0.398091	0.005215	up	yes	1.072	0.8135	BP:regulation of primary metabolic process;BP:regulation of metabolic process;BP:regulation of mRNA processing;BP:negative regulation of mRNA processing;BP:cellular response to amino acid starvation;BP:organic cyclic compound metabolic process;BP:cellular response to stimulus;BP:negative regulation of macromolecule metabolic process;BP:posttranscriptional regulation of gene expression;BP:rhythmic…	GO:0080090;GO:0019222;GO:0050684;GO:0050686;GO:0034198;GO:1901360;GO:0051716;GO:0010605;GO:0010608;GO:0048511;GO:0044093;GO:0048518;GO:0048519;GO:0046483;GO:0060255;GO:1902415;GO:0065009;GO:1902416;GO:0031668;GO:0031669;GO:0009605;GO:0010243;GO:0031667;GO:0000398;GO:0033554;GO:0051098;GO:0009892;GO:0009893;GO:0009891;GO:0050789;GO:0000381;GO:0044260;GO:0009719;GO:0065007;GO:0045727;GO:0007623;GO:…	K13159	HNRNPL	------	------	------	------	PF13893.3;PF00076.19	RRM_5;RRM_1	RNA recognition motif.;RNA recognition motif.	nuclear	1	52	64.1	High
P06732	Creatine kinase M-type OS=Homo sapiens OX=9606 GN=CKM PE=1 SV=2	0.753259	-0.408782	0.008256	down	yes	0.809	1.074	BP:negative regulation of striated muscle cell differentiation;BP:small molecule metabolic process;BP:single-organism metabolic process;BP:negative regulation of biological process;BP:negative regulation of cell death;BP:creatine metabolic process;BP:oxoacid metabolic process;BP:organonitrogen compound metabolic process;BP:cellular modified amino acid metabolic process;BP:organonitrogen compound …	GO:0051154;GO:0044281;GO:0044710;GO:0048519;GO:0060548;GO:0006600;GO:0043436;GO:1901564;GO:0006575;GO:1901566;GO:0048870;GO:0019538;GO:0002376;GO:0006599;GO:0042396;GO:0042398;GO:0006928;GO:2000811;GO:0006807;GO:0050789;GO:0044267;GO:0044260;GO:0050793;GO:0065007;GO:0016477;GO:0098602;GO:0098609;GO:0050794;GO:0046314;GO:0043412;GO:0036211;GO:0008150;GO:0008152;GO:0009266;GO:0090407;GO:0050896;GO:…	K00933	E2.7.3.2	hsa00330	Arginine and proline metabolism	COG3869	E:Amino acid transport and metabolism	PF00217.16;PF02807.12	ATP-gua_Ptrans;ATP-gua_PtransN	AT;AT	cytoplasmic	4	17	43.1	High
Q8IWB1	Inositol 1,4,5-trisphosphate receptor-interacting protein OS=Homo sapiens OX=9606 GN=ITPRIP PE=1 SV=1	1.36181	0.445524	0.02329	up	yes	1.084	0.796	CC:membrane;CC:cell part;CC:cellular_component;CC:plasma membrane;MF:molecular_function;MF:binding;MF:protein binding;	GO:0016020;GO:0044464;GO:0005575;GO:0005886;GO:0003674;GO:0005488;GO:0005515	------	------	------	------	------	------	PF03281.11	Mab-21	Mab-21 protein	plasma membrane	6	19	62	High
O94927	HAUS augmin-like complex subunit 5 OS=Homo sapiens OX=9606 GN=HAUS5 PE=1 SV=2	1.21775	0.28422	0.02734	up	yes	1.029	0.845	BP:regulation of microtubule polymerization or depolymerization;BP:negative regulation of microtubule polymerization or depolymerization;BP:protein homotetramerization;BP:G2/M transition of mitotic cell cycle;BP:behavior;BP:anion transport;BP:small molecule metabolic process;BP:small molecule catabolic process;BP:small molecule biosynthetic process;BP:regulation of microtubule depolymerization;BP…	GO:0031110;GO:0031111;GO:0051289;GO:0000086;GO:0007610;GO:0006820;GO:0044281;GO:0044282;GO:0044283;GO:0031114;GO:0071840;GO:0044712;GO:0044710;GO:0044711;GO:0043650;GO:0051494;GO:0006541;GO:0006543;GO:0048519;GO:0051704;GO:0043648;GO:0015849;GO:0051297;GO:0015711;GO:1901880;GO:0006835;GO:0043436;GO:0051705;GO:0003008;GO:0044700;GO:1901564;GO:1901565;GO:0016054;GO:0010639;GO:0098916;GO:0070507;GO:…	K16588	HAUS5	------	------	------	------	PF14817.3	HAUS5	HAUS augmin-like complex subunit 5	cytoplasmic	2	4	71.6	High
Q562R1	Beta-actin-like protein 2 OS=Homo sapiens OX=9606 GN=ACTBL2 PE=1 SV=2	1.29333	0.371085	0.02096	up	yes	1.056	0.8165	BP:biological_process;CC:organelle;CC:intracellular organelle;CC:non-membrane-bounded organelle;CC:membrane-bounded organelle;CC:cytoplasm;CC:extracellular space;CC:cytoskeleton;CC:vesicle;CC:extracellular vesicle;CC:extracellular exosome;CC:extracellular organelle;CC:intracellular non-membrane-bounded organelle;CC:cell part;CC:extracellular region part;CC:cellular_component;CC:intracellular part…	GO:0008150;GO:0043226;GO:0043229;GO:0043228;GO:0043227;GO:0005737;GO:0005615;GO:0005856;GO:0031982;GO:1903561;GO:0070062;GO:0043230;GO:0043232;GO:0044464;GO:0044421;GO:0005575;GO:0044424;GO:0035639;GO:0003674;GO:0005488;GO:0043167;GO:1901363;GO:1901265;GO:0001882;GO:0000166;GO:0001883;GO:0032549;GO:0017076;GO:0005524;GO:0036094;GO:0032555;GO:0030554;GO:0097367;GO:0097159;GO:0043168;GO:0032559;GO:…	------	------	------	------	COG5277	Z:Cytoskeleton	PF00022.16	Actin	Actin	cytoplasmic	3	27	42	High
Q9Y6D5	Brefeldin A-inhibited guanine nucleotide-exchange protein 2 OS=Homo sapiens OX=9606 GN=ARFGEF2 PE=1 SV=3	1.22654	0.294593	0.03722	up	yes	1.026	0.8365	BP:positive regulation of leukocyte proliferation;BP:regulation of cytokine secretion;BP:regulation of secretion;BP:positive regulation of secretion;BP:regulation of transport;BP:regulation of response to stimulus;BP:regulation of calcium-mediated signaling;BP:protein localization;BP:signal transduction;BP:regulation of signal transduction;BP:inorganic ion homeostasis;BP:single-organism metabolic…	GO:0070665;GO:0050707;GO:0051046;GO:0051047;GO:0051049;GO:0048583;GO:0050848;GO:0008104;GO:0007165;GO:0009966;GO:0098771;GO:0044710;GO:0002687;GO:0048869;GO:0010256;GO:2000403;GO:0044093;GO:0048518;GO:2000404;GO:0033036;GO:0032722;GO:0050801;GO:0019725;GO:0051056;GO:0045728;GO:0050688;GO:0002831;GO:0051050;GO:0042129;GO:0045184;GO:0002679;GO:0090196;GO:0072511;GO:0032012;GO:0050671;GO:0016192;GO:…	K18442	ARFGEF, BIG	hsa04144	Endocytosis	COG5307	R:General function prediction only	PF01369.17;PF12783.4;PF16213.2;PF09324.7	Sec7;Sec7_N;DCB;DUF1981	Sec7 domain;Guanine nucleotide exchange factor in Golgi transport N-terminal;Dimerisation and cyclophilin-binding domain of Mon2;Domain of unknown function	cytoplasmic	8	13	201.9	High
Q9NWM8	Peptidyl-prolyl cis-trans isomerase FKBP14 OS=Homo sapiens OX=9606 GN=FKBP14 PE=1 SV=1	1.25652	0.329433	0.006445	up	yes	1.036	0.8245	BP:signal transduction;BP:cellular response to stimulus;BP:peptidyl-amino acid modification;BP:organonitrogen compound catabolic process;BP:organonitrogen compound metabolic process;BP:peptidyl-proline modification;BP:organonitrogen compound biosynthetic process;BP:cellular biosynthetic process;BP:protein metabolic process;BP:cellular biogenic amine catabolic process;BP:cellular response to stres…	GO:0007165;GO:0051716;GO:0018193;GO:1901565;GO:1901564;GO:0018208;GO:1901566;GO:0044249;GO:0019538;GO:0042402;GO:0033554;GO:0006598;GO:0006457;GO:0006596;GO:0006595;GO:0006807;GO:0043170;GO:1901576;GO:1901575;GO:0044260;GO:0097164;GO:0065007;GO:0009308;GO:0009309;GO:0043412;GO:0036211;GO:0008150;GO:0008152;GO:0050794;GO:0061077;GO:0044271;GO:0050896;GO:0006950;GO:0006576;GO:0009310;GO:0042401;GO:…	K09577	FKBP14	------	------	COG0545	O:Posttranslational modification, protein turnover, chaperones	PF00254.25;PF13499.3;PF13405.3;PF00036.29	FKBP_C;EF-hand_7;EF-hand_6;EF-hand_1	FKBP-type peptidyl-prolyl cis-trans isomerase;EF-hand domain pair;EF-hand domain;EF hand	ER	1	8	24.2	High
Q8WWX9	Selenoprotein M OS=Homo sapiens OX=9606 GN=SELENOM PE=1 SV=3	0.791908	-0.336596	0.03117	down	yes	0.822	1.038	BP:developmental growth;BP:multicellular organism growth;BP:carbohydrate transmembrane transport;BP:hormone metabolic process;BP:hormone secretion;BP:glucocorticoid secretion;BP:corticosterone secretion;BP:polyol transport;BP:response to inorganic substance;BP:corticosteroid hormone secretion;BP:single-multicellular organism process;BP:myo-inositol transport;BP:steroid hormone secretion;BP:endocr…	GO:0048589;GO:0035264;GO:0034219;GO:0042445;GO:0046879;GO:0035933;GO:0035934;GO:0015791;GO:0010035;GO:0035930;GO:0044707;GO:0015798;GO:0035929;GO:0060986;GO:0015850;GO:0008645;GO:0008643;GO:0065007;GO:0065008;GO:0035428;GO:0006812;GO:0006811;GO:0006810;GO:0009888;GO:0006814;GO:0012501;GO:0008150;GO:0008152;GO:0051234;GO:0046903;GO:0010269;GO:0006869;GO:0060612;GO:0044699;GO:0010817;GO:0015672;GO:…	------	------	------	------	------	------	PF08806.8	Sep15_SelM	Sep15/SelM redox domain	extracellular	2	19	16.2	High
P67936	Tropomyosin alpha-4 chain OS=Homo sapiens OX=9606 GN=TPM4 PE=1 SV=3	1.31503	0.3951	0.01736	up	yes	1.054	0.8015	BP:muscle system process;BP:signal transduction;BP:cellular component organization or biogenesis;BP:neuropeptide signaling pathway;BP:cellular developmental process;BP:muscle contraction;BP:muscle filament sliding;BP:actin filament-based movement;BP:system process;BP:movement of cell or subcellular component;BP:cellular component organization;BP:biological regulation;BP:G-protein coupled receptor…	GO:0003012;GO:0007165;GO:0071840;GO:0007218;GO:0048869;GO:0006936;GO:0030049;GO:0030048;GO:0003008;GO:0006928;GO:0016043;GO:0065007;GO:0007186;GO:0050794;GO:0008150;GO:0030154;GO:0044699;GO:0033275;GO:0032502;GO:0032501;GO:0009987;GO:0043933;GO:0001649;GO:0071822;GO:0050789;GO:0030029;GO:0044767;GO:0044763;GO:0007015;GO:0070252;GO:0032432;GO:0099512;GO:0099513;GO:0097517;GO:0030055;GO:0031982;GO:…	K10375	TPM4	hsa05410;hsa05414;hsa04260;hsa04261	Hypertrophic cardiomyopath;Dilated cardiomyopathy;Cardiac muscle contraction;Adrenergic signaling in cardiomyocytes	------	------	PF00261.17;PF12718.4;PF06009.9	Tropomyosin;Tropomyosin_1;Laminin_II	Tropomyosin;Tropomyosin like;Laminin Domain II	cytoplasmic	6	61	28.5	High
Q86VN1	Vacuolar protein-sorting-associated protein 36 OS=Homo sapiens OX=9606 GN=VPS36 PE=1 SV=1	0.807992	-0.307587	0.04862	down	yes	0.829	1.026	BP:protein localization;BP:regulation of primary metabolic process;BP:regulation of metabolic process;BP:organic cyclic compound biosynthetic process;BP:cellular component organization or biogenesis;BP:RNA biosynthetic process;BP:cellular macromolecule localization;BP:regulation of cellular metabolic process;BP:biological regulation;BP:protein targeting to vacuole involved in ubiquitin-dependent …	GO:0008104;GO:0080090;GO:0019222;GO:1901362;GO:0071840;GO:0032774;GO:0070727;GO:0031323;GO:0065007;GO:0043328;GO:0016197;GO:0060255;GO:0006605;GO:0045184;GO:2001141;GO:0050794;GO:0046483;GO:0019438;GO:0000398;GO:0022607;GO:0006807;GO:0097659;GO:1901576;GO:0044260;GO:0006886;GO:0016043;GO:1901360;GO:0018130;GO:0006139;GO:0006810;GO:0009889;GO:0006623;GO:0008150;GO:0034654;GO:0051234;GO:0016070;GO:…	K12190	VPS36, EAP45	hsa04144	Endocytosis	------	------	PF04157.13;PF11605.5	EAP30;Vps36_ESCRT-II	EAP30/Vps36 family;Vacuolar protein sorting protein 36 Vps36	cytoplasmic	1	3	43.8	High
H0YAV1	Ribonucleoside-diphosphate reductase subunit M2 B (Fragment) OS=Homo sapiens OX=9606 GN=RRM2B PE=1 SV=1	0.786957	-0.345644	0.04267	down	yes	0.8145	1.035	BP:negative regulation of apoptotic signaling pathway;BP:regulation of apoptotic signaling pathway;BP:negative regulation of response to stimulus;BP:nucleotide biosynthetic process;BP:renal system process;BP:small molecule metabolic process;BP:organic cyclic compound biosynthetic process;BP:organic cyclic compound metabolic process;BP:single-organism metabolic process;BP:single-organism biosynthe…	GO:2001234;GO:2001233;GO:0048585;GO:0009165;GO:0003014;GO:0044281;GO:1901362;GO:1901360;GO:0044710;GO:0044711;GO:0009968;GO:0009966;GO:0001822;GO:0006264;GO:0048513;GO:0006260;GO:0006261;GO:1901797;GO:1901796;GO:0046483;GO:0009200;GO:0048583;GO:0010033;GO:0055114;GO:0003008;GO:0023057;GO:0010243;GO:0033554;GO:1902254;GO:1902253;GO:0009141;GO:0006807;GO:1901576;GO:0010646;GO:0044260;GO:0065007;GO:…	------	------	------	------	COG0208	F:Nucleotide transport and metabolism	PF00268.18	Ribonuc_red_sm	Ribonucleotide reductase, small chain	cytoplasmic	1	8	47	High
A0A2R8Y793	Actin, cytoplasmic 1 (Fragment) OS=Homo sapiens OX=9606 GN=ACTB PE=1 SV=1	1.24075	0.311215	0.01697	up	yes	1.023	0.8245	------	------	------	------	------	------	COG5277	Z:Cytoskeleton	PF00022.16	Actin	Actin	cytoplasmic	9	80	34.1	High
Q8WWZ8	Oncoprotein-induced transcript 3 protein OS=Homo sapiens OX=9606 GN=OIT3 PE=1 SV=2	1.38154	0.466274	0.01166	up	yes	1.07	0.7745	BP:cellular component organization or biogenesis;BP:biological regulation;BP:macromolecular complex remodeling;BP:protein-lipid complex remodeling;BP:plasma lipoprotein particle remodeling;BP:reverse cholesterol transport;BP:single-multicellular organism process;BP:chemical homeostasis;BP:high-density lipoprotein particle remodeling;BP:sterol transport;BP:organic hydroxy compound transport;BP:cel…	GO:0071840;GO:0065007;GO:0034367;GO:0034368;GO:0034369;GO:0043691;GO:0044707;GO:0048878;GO:0034375;GO:0015918;GO:0015850;GO:0016043;GO:0044699;GO:0065008;GO:0050793;GO:0006810;GO:0050794;GO:0008150;GO:0051234;GO:0006869;GO:0030301;GO:0032501;GO:0009987;GO:0045596;GO:0045595;GO:0048519;GO:0055085;GO:0051093;GO:0043933;GO:0042592;GO:0071825;GO:0071827;GO:0050789;GO:0071702;GO:0010745;GO:0010743;GO:…	------	------	------	------	------	------	PF00100.20;PF14670.3;PF12662.4	Zona_pellucida;FXa_inhibition;cEGF	Zona pellucida-like domain;Coagulation Factor Xa inhibitory site;Complement Clr-like EGF-like	extracellular	1	1	60	Medium
O60231	Pre-mRNA-splicing factor ATP-dependent RNA helicase DHX16 OS=Homo sapiens OX=9606 GN=DHX16 PE=1 SV=2	1.31069	0.390329	0.009878	up	yes	1.042	0.795	BP:regulation of protein localization;BP:regulation of peptide transport;BP:positive regulation of dendritic spine morphogenesis;BP:primary metabolic process;BP:regulation of secretion;BP:lactation;BP:regulation of transport;BP:learning;BP:memory;BP:behavior;BP:learning or memory;BP:positive regulation of neuron differentiation;BP:signal transduction;BP:cell surface receptor signaling pathway;BP:…	GO:0032880;GO:0090087;GO:0061003;GO:0044238;GO:0051046;GO:0007595;GO:0051049;GO:0007612;GO:0007613;GO:0007610;GO:0007611;GO:0045666;GO:0007165;GO:0007166;GO:0007167;GO:0048266;GO:1901360;GO:0031346;GO:0032879;GO:0071704;GO:0009966;GO:0048523;GO:0009612;GO:0060999;GO:0010720;GO:0048518;GO:0048519;GO:0016192;GO:0051056;GO:0051051;GO:0035176;GO:0048583;GO:0007264;GO:0007528;GO:0090276;GO:0010976;GO:…	K12813	DHX16	hsa03040	Spliceosome	COG1643	L:Replication, recombination and repair	PF04408.20;PF07717.13;PF00271.28;PF00270.26	HA2;OB_NTP_bind;Helicase_C;DEAD	Helicase associated domain;Oligonucleotide/oligosaccharide-binding;Helicase conserved C-terminal domain;DEAD/DEAH box helicase	nuclear	7	10	119.2	High
D3YTA9	Calcineurin subunit B type 1 OS=Homo sapiens OX=9606 GN=PPP3R1 PE=1 SV=1	0.776112	-0.365663	0.01103	down	yes	0.8025	1.034	BP:regulation of primary metabolic process;BP:regulation of metabolic process;BP:regulation of cellular biosynthetic process;BP:regulation of cellular metabolic process;BP:nucleobase-containing compound metabolic process;BP:nucleic acid metabolic process;BP:nitrogen compound metabolic process;BP:regulation of DNA-dependent DNA replication;BP:regulation of biological process;BP:organic cyclic comp…	GO:0080090;GO:0019222;GO:0031326;GO:0031323;GO:0006139;GO:0090304;GO:0006807;GO:0090329;GO:0050789;GO:1901360;GO:0044710;GO:0044260;GO:0071704;GO:2000112;GO:0060255;GO:0065007;GO:0051052;GO:0006281;GO:0019219;GO:0006725;GO:0009987;GO:0009889;GO:0051716;GO:0050794;GO:0006974;GO:0006259;GO:0006950;GO:0008150;GO:0051171;GO:0008152;GO:0006289;GO:0046483;GO:0044238;GO:0044699;GO:0050896;GO:0034641;GO:…	K06268	PPP3R, CNB	hsa04659;hsa04658;hsa04022;hsa04650;hsa04020;hsa04720;hsa04724;hsa04380;hsa04924;hsa04922;hsa04921;hsa05166;hsa04310;hsa04370;hsa04114;hsa04660;hsa04662;hsa04010;hsa05031;hsa05152;hsa05014;hsa04360;hsa05010	Th17 cell differentiation;Th1 and Th2 cell differentiation;cGMP-PKG signaling pathway;Natural killer cell mediated cytotoxicity;Calcium signaling pathway;Long-term potentiation;Glutamatergic synapse;Osteoclast differentiation;Renin secretion;Glucagon signaling pathway;Oxytocin signaling pathway;HTLV-I infection;Wnt signaling pathway;VEGF signaling pathway;Oocyte meiosis;T cell receptor signaling …	COG5126;COG5126;COG5126	D:Cell cycle control, cell division, chromosome partitioning;Z:Cytoskeleton;T:Signal transduction mechanisms	PF00036.29;PF13499.3;PF13202.3;PF13405.3;PF13833.3;PF10591.6;PF12763.4	EF-hand_1;EF-hand_7;EF-hand_5;EF-hand_6;EF-hand_8;SPARC_Ca_bdg;EF-hand_4	EF hand;EF-hand domain pair;EF hand;EF-hand domain;EF-hand domain pair;Secreted protein acidic and rich in cysteine Ca binding region;Cytoskeletal-regulatory complex EF hand	cytoplasmic	2	24	21.4	High
B7Z4M1	Reticulon OS=Homo sapiens OX=9606 GN=RTN3 PE=1 SV=1	1.32489	0.405872	0.00028	up	yes	1.046	0.7895	BP:cellular component assembly;BP:chemical synaptic transmission;BP:symbiosis, encompassing mutualism through parasitism;BP:cellular component organization or biogenesis;BP:cell death;BP:endoplasmic reticulum tubular network organization;BP:endoplasmic reticulum tubular network assembly;BP:endoplasmic reticulum organization;BP:cellular component organization;BP:interspecies interaction between or…	GO:0022607;GO:0007268;GO:0044403;GO:0071840;GO:0008219;GO:0071786;GO:0071787;GO:0007029;GO:0016043;GO:0044419;GO:0099536;GO:0044699;GO:0051704;GO:0009987;GO:0016032;GO:0006810;GO:0012501;GO:0044764;GO:0008150;GO:0023052;GO:0007267;GO:0007154;GO:0051234;GO:0051179;GO:0006996;GO:0044700;GO:0016192;GO:0044763;GO:0098916;GO:0006915;GO:0099537;GO:0005789;GO:0043226;GO:0043227;GO:0031224;GO:0044446;GO:…	K20723	RTN3	hsa05010	Alzheimer's disease	------	------	PF02453.14	Reticulon	Reticulon	cytoplasmic	1	19	12.7	High
E9PCX5	Transmembrane protein 161B OS=Homo sapiens OX=9606 GN=TMEM161B PE=1 SV=1	1.20675	0.271128	0.04196	up	yes	1.001	0.8295	BP:nucleic acid metabolic process;BP:cellular nitrogen compound metabolic process;BP:nitrogen compound metabolic process;BP:organic cyclic compound metabolic process;BP:nucleobase-containing compound metabolic process;BP:single-organism metabolic process;BP:cellular macromolecule metabolic process;BP:organic substance metabolic process;BP:cellular process;BP:cellular aromatic compound metabolic p…	GO:0090304;GO:0034641;GO:0006807;GO:1901360;GO:0006139;GO:0044710;GO:0044260;GO:0071704;GO:0009987;GO:0006725;GO:0008150;GO:0008152;GO:0055114;GO:0046483;GO:0044238;GO:0044699;GO:0044237;GO:0043170;GO:0015074;GO:0006259;GO:0016021;GO:0016020;GO:0031224;GO:0005575;GO:0044425;GO:0003674;GO:0005488;GO:0003676;GO:1901363;GO:0016491;GO:0003824;GO:0097159	------	------	------	------	------	------	PF10268.6	Tmemb_161AB	Predicted transmembrane protein 161AB	peroxisomal	1	2	56.9	High
Q96HA1	Nuclear envelope pore membrane protein POM 121 OS=Homo sapiens OX=9606 GN=POM121 PE=1 SV=2	1.2457	0.316957	0.04377	up	yes	1.014	0.814	BP:nuclear transport;BP:nuclear export;BP:regulation of metabolic process;BP:regulation of transport;BP:membrane organization;BP:protein localization;BP:small molecule metabolic process;BP:cellular localization;BP:small molecule biosynthetic process;BP:organic cyclic compound biosynthetic process;BP:organic cyclic compound metabolic process;BP:single-organism metabolic process;BP:single-organism …	GO:0051169;GO:0051168;GO:0019222;GO:0051049;GO:0061024;GO:0008104;GO:0044281;GO:0051641;GO:0044283;GO:1901362;GO:1901360;GO:0044710;GO:0044711;GO:0010605;GO:0070647;GO:0018193;GO:0075733;GO:0044419;GO:0032446;GO:0006071;GO:0019400;GO:0051704;GO:0060255;GO:0048583;GO:0030397;GO:0045184;GO:0007077;GO:0046483;GO:0018205;GO:0010468;GO:0019538;GO:0016458;GO:0006409;GO:0009892;GO:0019083;GO:0006807;GO:…	K14316	POM121, NUP121	hsa03013	RNA transport	------	------	PF15229.3	POM121	POM121 family	ER	2	3	127.6	High
M0QXZ5	Zinc finger protein 428 (Fragment) OS=Homo sapiens OX=9606 GN=ZNF428 PE=1 SV=1	1.44407	0.530143	0.01309	up	yes	1.078	0.7465	BP:regulation of primary metabolic process;BP:regulation of metabolic process;BP:regulation of cellular biosynthetic process;BP:regulation of cellular metabolic process;BP:regulation of biological process;BP:regulation of cellular macromolecule biosynthetic process;BP:regulation of nucleobase-containing compound metabolic process;BP:biological regulation;BP:regulation of gene expression;BP:regula…	GO:0080090;GO:0019222;GO:0031326;GO:0031323;GO:0050789;GO:2000112;GO:0019219;GO:0065007;GO:0010468;GO:0060255;GO:0009889;GO:1903506;GO:0050794;GO:0008150;GO:0051171;GO:2001141;GO:0051252;GO:0006355;GO:0010556;GO:0044464;GO:0005622;GO:0005575;GO:0003674;GO:0005488;GO:0003676;GO:1901363;GO:0097159	------	------	------	------	------	------	------	------	------	peroxisomal	1	8	23.6	High
P36894	Bone morphogenetic protein receptor type-1A OS=Homo sapiens OX=9606 GN=BMPR1A PE=1 SV=2	1.3687	0.452803	0.01623	up	yes	1.045	0.7635	BP:regulation of intracellular protein transport;BP:regulation of transport;BP:regulation of phosphate metabolic process;BP:outflow tract morphogenesis;BP:cellular response to stimulus;BP:mesenchymal cell development;BP:regulation of metabolic process;BP:cell development;BP:regulation of epithelial cell proliferation;BP:somitogenesis;BP:fibrous ring of heart morphogenesis;BP:regulation of phospho…	GO:0033157;GO:0051049;GO:0019220;GO:0003151;GO:0051716;GO:0014031;GO:0019222;GO:0048468;GO:0050678;GO:0001756;GO:1905285;GO:0042325;GO:0042327;GO:0019538;GO:1904589;GO:0090342;GO:0009893;GO:0009891;GO:0048568;GO:0017004;GO:0030500;GO:0051222;GO:0051223;GO:0050789;GO:0003206;GO:0003203;GO:0003208;GO:0071840;GO:1901861;GO:0014032;GO:0070201;GO:0070169;GO:1903649;GO:0070167;GO:0043412;GO:0002053;GO:…	K04673	BMPR1A, ALK3, CD292	hsa04350;hsa05418;hsa04550;hsa04390;hsa04060	TGF-beta signaling pathway;Fluid shear stress and atherosclerosis;Signaling pathways regulating pluripotency of stem cells;Hippo signaling pathway;Cytokine-cytokine receptor interaction	------	------	PF07714.14;PF00069.22;PF08515.9;PF01064.20	Pkinase_Tyr;Pkinase;TGF_beta_GS;Activin_recp	Protein tyrosine kinase;Protein kinase domain;Transforming growth factor beta type I GS-motif;Activin types I and II receptor domain	ER	1	3	60.2	High
E7ETY2	Treacle protein OS=Homo sapiens OX=9606 GN=TCOF1 PE=1 SV=1	1.52974	0.613287	0.04146	up	yes	1.093	0.7145	CC:intracellular organelle;CC:non-membrane-bounded organelle;CC:membrane-bounded organelle;CC:organelle;CC:intrinsic component of membrane;CC:cytoplasm;CC:cellular_component;CC:nucleolus;CC:intrinsic component of plasma membrane;CC:nucleus;CC:nucleolar part;CC:plasma membrane part;CC:fibrillar center;CC:integral component of plasma membrane;CC:intracellular membrane-bounded organelle;CC:intracell…	GO:0043229;GO:0043228;GO:0043227;GO:0043226;GO:0031224;GO:0005737;GO:0005575;GO:0005730;GO:0031226;GO:0005634;GO:0044452;GO:0044459;GO:0001650;GO:0005887;GO:0043231;GO:0043232;GO:0005829;GO:0044444;GO:0044464;GO:0044446;GO:0044428;GO:0044424;GO:0044425;GO:0016021;GO:0044422;GO:0038023;GO:0038062;GO:0038064;GO:0060089;GO:0003674;GO:0004872;GO:0004871;GO:0004714;GO:0016740;GO:0004713;GO:0004672;GO:…	------	------	------	------	------	------	PF03546.11	Treacle	Treacher Collins syndrome protein Treacle	nuclear	2	26	152.2	High
Q9Y5X1	Sorting nexin-9 OS=Homo sapiens OX=9606 GN=SNX9 PE=1 SV=1	1.22449	0.292181	0.04916	up	yes	0.99	0.8085	BP:cleavage furrow formation;BP:regulation of membrane protein ectodomain proteolysis;BP:positive regulation of membrane protein ectodomain proteolysis;BP:regulation of primary metabolic process;BP:regulation of metabolic process;BP:membrane organization;BP:plasma membrane organization;BP:protein localization;BP:regulation of phosphate metabolic process;BP:cellular component organization or bioge…	GO:0036089;GO:0051043;GO:0051044;GO:0080090;GO:0019222;GO:0061024;GO:0007009;GO:0008104;GO:0019220;GO:0071840;GO:0065003;GO:0051716;GO:0070727;GO:0048869;GO:0044093;GO:0048518;GO:0033036;GO:0060255;GO:0045859;GO:0045184;GO:0030162;GO:0010033;GO:0016192;GO:0000910;GO:0042327;GO:0016050;GO:0060988;GO:0009896;GO:0009894;GO:0022607;GO:0009893;GO:0033674;GO:0007067;GO:0050789;GO:0051347;GO:0043547;GO:…	K17923	SNX9_18_33	------	------	------	------	PF10456.6;PF00787.21;PF00018.25;PF14604.3;PF07653.14	BAR_3_WASP_bdg;PX;SH3_1;SH3_9;SH3_2	WASP-binding domain of Sorting nexin protein;PX domain;SH3 domain;Variant SH3 domain;Variant SH3 domain	cytoplasmic	6	18	66.6	High
O15525	Transcription factor MafG OS=Homo sapiens OX=9606 GN=MAFG PE=1 SV=1	1.24953	0.321387	0.01091	up	yes	0.999	0.7995	BP:regulation of kinase activity;BP:hemostasis;BP:cytokine-mediated signaling pathway;BP:regulation of secretion;BP:regulation of homotypic cell-cell adhesion;BP:regulation of transport;BP:negative regulation of response to stimulus;BP:blood coagulation;BP:regulation of response to stimulus;BP:behavior;BP:regulation of response to cytokine stimulus;BP:signal transduction;BP:cell surface receptor …	GO:0043549;GO:0007599;GO:0019221;GO:0051046;GO:0034110;GO:0051049;GO:0048585;GO:0007596;GO:0048583;GO:0007610;GO:0060759;GO:0007165;GO:0007166;GO:0098771;GO:0019220;GO:0010556;GO:1901362;GO:1901360;GO:0080090;GO:0043200;GO:0051716;GO:0010605;GO:0009968;GO:0045785;GO:0009966;GO:0048869;GO:0070647;GO:0042532;GO:0032446;GO:0030856;GO:0048518;GO:0048519;GO:0030155;GO:0019725;GO:0034112;GO:0044708;GO:…	K09037	MAFF_G_K	------	------	------	------	PF03131.14	bZIP_Maf	bZIP Maf transcription factor	cytoplasmic	1	13	17.8	High
A0A3B3ISQ4	Epidermal growth factor receptor kinase substrate 8-like protein 2 OS=Homo sapiens OX=9606 GN=EPS8L2 PE=1 SV=1	1.2464	0.317772	0.02787	up	yes	0.9965	0.7995	BP:regulation of GTPase activity;BP:regulation of small GTPase mediated signal transduction;BP:regulation of signaling;BP:regulation of cellular component organization;BP:regulation of biological process;BP:regulation of cell projection assembly;BP:regulation of Rho protein signal transduction;BP:regulation of hydrolase activity;BP:regulation of cell projection organization;BP:positive regulation…	GO:0043087;GO:0051056;GO:0023051;GO:0051128;GO:0050789;GO:0060491;GO:0035023;GO:0051336;GO:0031344;GO:0043085;GO:0031346;GO:1902531;GO:0010646;GO:0051345;GO:1900029;GO:0009966;GO:1900027;GO:0065007;GO:0044093;GO:0048518;GO:0065009;GO:0051130;GO:0050790;GO:0046578;GO:0048583;GO:0050794;GO:0008150;GO:0043547;GO:0044087;GO:0048522;GO:0044089;GO:0098590;GO:0043227;GO:0005737;GO:0070062;GO:0016020;GO:…	K17277	EPS8	------	------	------	------	PF08416.10;PF00018.25;PF14604.3;PF07653.14;PF00640.20	PTB;SH3_1;SH3_9;SH3_2;PID	Phosphotyrosine-binding domain;SH3 domain;Variant SH3 domain;Variant SH3 domain;Phosphotyrosine interaction domain	cytoplasmic	2	5	88	High
Q96P16	Regulation of nuclear pre-mRNA domain-containing protein 1A OS=Homo sapiens OX=9606 GN=RPRD1A PE=1 SV=1	1.25346	0.325915	0.01576	up	yes	0.9965	0.795	BP:regulation of primary metabolic process;BP:regulation of metabolic process;BP:protein dephosphorylation;BP:organic cyclic compound biosynthetic process;BP:organic cyclic compound metabolic process;BP:ncRNA transcription;BP:regulation of macromolecule metabolic process;BP:regulation of RNA biosynthetic process;BP:heterocycle metabolic process;BP:protein metabolic process;BP:aromatic compound bi…	GO:0080090;GO:0019222;GO:0006470;GO:1901362;GO:1901360;GO:0098781;GO:0060255;GO:2001141;GO:0046483;GO:0019538;GO:0019438;GO:0006807;GO:0034660;GO:0050789;GO:0097659;GO:0044267;GO:0044260;GO:0065007;GO:0006366;GO:0018130;GO:0009889;GO:0050794;GO:0043412;GO:0036211;GO:0008150;GO:0008152;GO:0034654;GO:0009301;GO:0016070;GO:0016073;GO:0044271;GO:0006355;GO:0006357;GO:0006351;GO:0032774;GO:0016311;GO:…	------	------	------	------	------	------	PF16566.2;PF04818.10	CREPT;CTD_bind	Cell-cycle alteration and expression-elevated protein in tumour;RNA polymerase II-binding domain.	cytoplasmic	4	21	35.7	High
Q96B49	Mitochondrial import receptor subunit TOM6 homolog OS=Homo sapiens OX=9606 GN=TOMM6 PE=1 SV=1	0.827198	-0.273695	0.04608	down	yes	0.809	0.978	BP:protein localization;BP:macroautophagy;BP:protein transport;BP:organic substance transport;BP:macromolecule localization;BP:transport;BP:autophagy;BP:cellular process;BP:establishment of protein localization;BP:biological_process;BP:establishment of localization;BP:localization;CC:intracellular organelle;CC:membrane-bounded organelle;CC:organelle;CC:organelle part;CC:cellular_component;CC:orga…	GO:0008104;GO:0016236;GO:0015031;GO:0071702;GO:0033036;GO:0006810;GO:0006914;GO:0009987;GO:0045184;GO:0008150;GO:0051234;GO:0051179;GO:0043229;GO:0043227;GO:0043226;GO:0044422;GO:0005575;GO:0031090;GO:0005765;GO:0098805;GO:0016020;GO:0098852;GO:0005739;GO:0005774;GO:0044455;GO:0044437;GO:0098588;GO:0031968;GO:0044446;GO:0031966;GO:0099078;GO:0043234;GO:0032991;GO:0043231;GO:0044464;GO:0019867;GO:…	K17772	TOM6	------	------	------	------	PF15184.3	TOM6p	Mitochondrial import receptor subunit TOM6 homolog	mitochondrial	1	19	8	High
Q96JN8	Neuralized-like protein 4 OS=Homo sapiens OX=9606 GN=NEURL4 PE=1 SV=2	1.40337	0.488892	0.0177	up	yes	1.042	0.7425	BP:cellular component assembly;BP:fertilization;BP:cellular process involved in reproduction in multicellular organism;BP:cellular component assembly involved in morphogenesis;BP:single-organism organelle organization;BP:gamete generation;BP:cellular component organization or biogenesis;BP:cellular component organization;BP:organelle assembly;BP:developmental process involved in reproduction;BP:a…	GO:0022607;GO:0009566;GO:0022412;GO:0010927;GO:1902589;GO:0007276;GO:0071840;GO:0016043;GO:0070925;GO:0003006;GO:0048646;GO:0032502;GO:0048609;GO:0009987;GO:0044767;GO:0007283;GO:0008150;GO:0007338;GO:0048232;GO:0001675;GO:0006996;GO:0044699;GO:0044702;GO:0022414;GO:0016050;GO:0044763;GO:0033363;GO:0002080;GO:0043229;GO:0043228;GO:0043226;GO:0031224;GO:0005737;GO:0044446;GO:0030667;GO:0031090;GO:…	K16777	NEURL4	------	------	------	------	PF07177.9	Neuralized	Neuralized	cytoplasmic	1	1	166.8	Low
Q16798	NADP-dependent malic enzyme, mitochondrial OS=Homo sapiens OX=9606 GN=ME3 PE=2 SV=2	1.24121	0.311743	0.03606	up	yes	0.988	0.796	BP:cellular component organization;BP:small molecule biosynthetic process;BP:tricarboxylic acid metabolic process;BP:cellular component organization or biogenesis;BP:single-organism metabolic process;BP:single-organism biosynthetic process;BP:ubiquinone-6 biosynthetic process;BP:ubiquinone-6 metabolic process;BP:NADH dehydrogenase complex assembly;BP:electron transport chain;BP:respiratory electr…	GO:0016043;GO:0044283;GO:0072350;GO:0071840;GO:0044710;GO:0044711;GO:1901006;GO:1901004;GO:0010257;GO:0022900;GO:0022904;GO:0032787;GO:0043436;GO:0055114;GO:0043648;GO:0044281;GO:0022607;GO:0009060;GO:1901576;GO:0051186;GO:1901663;GO:0051188;GO:1901661;GO:0065003;GO:0006812;GO:0006811;GO:0006810;GO:0006814;GO:0008150;GO:0008152;GO:0051234;GO:0015980;GO:0006101;GO:0045333;GO:0070271;GO:0006732;GO:…	K00029	E1.1.1.40, maeB	hsa00620;hsa01200	Pyruvate metabolism;Carbon metabolism	COG0281	C:Energy production and conversion	PF03949.12;PF00390.16	Malic_M;malic	Malic enzyme, NAD binding domain;Malic enzyme, N-terminal domain	mitochondrial	4	14	67	High
O43505	Beta-1,4-glucuronyltransferase 1 OS=Homo sapiens OX=9606 GN=B4GAT1 PE=1 SV=1	1.33902	0.421174	0.04075	up	yes	1.021	0.7625	BP:protein localization;BP:regulation of primary metabolic process;BP:regulation of metabolic process;BP:positive regulation of response to stimulus;BP:regulation of response to stimulus;BP:regulation of response to extracellular stimulus;BP:small molecule metabolic process;BP:regulation of signal transduction;BP:protein mannosylation;BP:protein O-linked mannosylation;BP:cellular component organi…	GO:0008104;GO:0080090;GO:0019222;GO:0048584;GO:0048583;GO:0032104;GO:0044281;GO:0009966;GO:0035268;GO:0035269;GO:0071840;GO:0043200;GO:0044710;GO:0044711;GO:0010605;GO:0043207;GO:0070727;GO:0009615;GO:0071310;GO:0042339;GO:0044419;GO:0010466;GO:0009967;GO:0044093;GO:0044092;GO:0043281;GO:0048519;GO:0060255;GO:0060548;GO:0008361;GO:0030162;GO:0043436;GO:0009607;GO:0097485;GO:0051707;GO:0010033;GO:…	K21032	B4GAT1	hsa00515	Mannose type O-glycan biosynthesis	------	------	PF13896.3	Glyco_transf_49	Glycosyl-transferase for dystroglycan	ER	4	19	47.1	High
O60826	Coiled-coil domain-containing protein 22 OS=Homo sapiens OX=9606 GN=CCDC22 PE=1 SV=1	1.20273	0.26631	0.04895	up	yes	0.97	0.8065	BP:regulation of intracellular protein transport;BP:regulation of secretion;BP:positive regulation of secretion;BP:regulation of transport;BP:purine ribonucleoside monophosphate metabolic process;BP:small molecule metabolic process;BP:small molecule catabolic process;BP:ribonucleoside monophosphate metabolic process;BP:inorganic ion homeostasis;BP:maintenance of location in cell;BP:ribonucleoside…	GO:0033157;GO:0051046;GO:0051047;GO:0051049;GO:0009167;GO:0044281;GO:0044282;GO:0009161;GO:0098771;GO:0051651;GO:0009199;GO:0048585;GO:0048584;GO:0046483;GO:0051196;GO:0051197;GO:0051194;GO:0051193;GO:0034284;GO:0019538;GO:0045821;GO:1904589;GO:0009896;GO:0019320;GO:0009894;GO:0009893;GO:0010906;GO:0051220;GO:0051222;GO:0051223;GO:0051224;GO:0050789;GO:0051347;GO:0045981;GO:0006110;GO:0045913;GO:…	------	------	------	------	------	------	PF05667.8	DUF812	Protein of unknown function	cytoplasmic	7	19	70.7	High
Q5SW96	Low density lipoprotein receptor adapter protein 1 OS=Homo sapiens OX=9606 GN=LDLRAP1 PE=1 SV=3	1.53605	0.619221	0.04271	up	yes	1.076	0.7005	BP:regulation of primary metabolic process;BP:regulation of metabolic process;BP:positive regulation of receptor-mediated endocytosis involved in cholesterol transport;BP:regulation of transport;BP:positive regulation of response to stimulus;BP:regulation of response to stimulus;BP:membrane organization;BP:small molecule metabolic process;BP:positive regulation of receptor-mediated endocytosis;BP…	GO:0080090;GO:0019222;GO:1905602;GO:0051049;GO:0048584;GO:0048583;GO:0061024;GO:0044281;GO:0048260;GO:0090003;GO:0071840;GO:0044710;GO:0009967;GO:0045834;GO:0048518;GO:0051050;GO:1902652;GO:0030301;GO:0016192;GO:0023056;GO:0044707;GO:0019538;GO:0048878;GO:0009893;GO:0015918;GO:0015850;GO:0090181;GO:0042982;GO:0044260;GO:0016043;GO:0065007;GO:1901360;GO:0065009;GO:0065008;GO:0051130;GO:0070201;GO:…	K12474	LDLRAP1, ARH	hsa04144	Endocytosis	------	------	PF00640.20;PF14719.3;PF08416.10	PID;PID_2;PTB	Phosphotyrosine interaction domain;Phosphotyrosine interaction domain;Phosphotyrosine-binding domain	mitochondrial	1	4	33.9	High
Q8IY37	Probable ATP-dependent RNA helicase DHX37 OS=Homo sapiens OX=9606 GN=DHX37 PE=1 SV=1	1.20559	0.269739	0.03832	up	yes	0.9705	0.805	BP:protein localization;BP:organic cyclic compound metabolic process;BP:macromolecule localization;BP:rRNA processing;BP:ncRNA processing;BP:establishment of protein localization;BP:heterocycle metabolic process;BP:ncRNA metabolic process;BP:cellular macromolecule metabolic process;BP:ion transport;BP:transport;BP:biological_process;BP:metabolic process;BP:establishment of localization;BP:rRNA me…	GO:0008104;GO:1901360;GO:0033036;GO:0006364;GO:0034470;GO:0045184;GO:0046483;GO:0034660;GO:0044260;GO:0006811;GO:0006810;GO:0008150;GO:0008152;GO:0051234;GO:0016072;GO:0016070;GO:0034641;GO:0044699;GO:0006139;GO:0006725;GO:0043170;GO:0006807;GO:0090304;GO:0071704;GO:0071702;GO:0009987;GO:0044765;GO:0051179;GO:1902578;GO:0044238;GO:0044237;GO:0015031;GO:0006396;GO:0016021;GO:0016020;GO:0098588;GO:…	K14780	DHX37, DHR1	------	------	COG1643	L:Replication, recombination and repair	PF07717.13;PF04408.20;PF00270.26;PF00271.28;PF13401.3	OB_NTP_bind;HA2;DEAD;Helicase_C;AAA_22	Oligonucleotide/oligosaccharide-binding;Helicase associated domain;DEAD/DEAH box helicase;Helicase conserved C-terminal domain;AAA domain	cytoplasmic	6	10	129.5	High
Q96FX7	tRNA (adenine(58)-N(1))-methyltransferase catalytic subunit TRMT61A OS=Homo sapiens OX=9606 GN=TRMT61A PE=1 SV=1	1.42447	0.510426	0.03499	up	yes	1.042	0.7315	BP:regulation of secretion;BP:negative regulation of secretion;BP:regulation of transport;BP:RNA methylation;BP:RNA modification;BP:organic cyclic compound metabolic process;BP:single-organism metabolic process;BP:single-organism biosynthetic process;BP:mRNA methylation;BP:peptidyl-amino acid modification;BP:positive regulation of molecular function;BP:negative regulation of biological process;BP…	GO:0051046;GO:0051048;GO:0051049;GO:0001510;GO:0009451;GO:1901360;GO:0044710;GO:0044711;GO:0080009;GO:0018193;GO:0044093;GO:0048519;GO:0034470;GO:0051051;GO:0046483;GO:0019538;GO:0017182;GO:0018202;GO:0017183;GO:0006807;GO:0034660;GO:0051223;GO:0051224;GO:0050789;GO:0044267;GO:0050708;GO:0050709;GO:0044260;GO:0065007;GO:0065009;GO:0032259;GO:0070201;GO:0006139;GO:0050794;GO:0043412;GO:0036211;GO:…	K07442	TRM61, GCD14	------	------	COG2519	J:Translation, ribosomal structure and biogenesis	PF08704.7	GCD14	tRNA methyltransferase complex GCD14 subunit	cytoplasmic	1	6	31.4	High
O15162	Phospholipid scramblase 1 OS=Homo sapiens OX=9606 GN=PLSCR1 PE=1 SV=1	0.783661	-0.351698	0.03906	down	yes	0.777	0.9915	BP:regulation of primary metabolic process;BP:regulation of metabolic process;BP:positive regulation of response to stimulus;BP:regulation of response to stimulus;BP:nucleobase-containing compound metabolic process;BP:positive regulation of defense response;BP:membrane organization;BP:plasma membrane organization;BP:organic cyclic compound biosynthetic process;BP:cellular component organization o…	GO:0080090;GO:0019222;GO:0048584;GO:0048583;GO:0006139;GO:0031349;GO:0061024;GO:0007009;GO:1901362;GO:0071840;GO:0006361;GO:0044710;GO:0044711;GO:0010604;GO:0043207;GO:0009966;GO:0009615;GO:0001775;GO:0002684;GO:0002252;GO:0044093;GO:0048518;GO:0065007;GO:0046483;GO:0006383;GO:0051254;GO:0060255;GO:0032781;GO:0032481;GO:0006354;GO:2001141;GO:0046486;GO:0051707;GO:0010033;GO:0030168;GO:0006575;GO:…	------	------	------	------	------	------	PF03803.12	Scramblase	Scramblase	cytoplasmic	1	6	35	High
Q13242	Serine/arginine-rich splicing factor 9 OS=Homo sapiens OX=9606 GN=SRSF9 PE=1 SV=1	1.2265	0.294545	0.02378	up	yes	0.972	0.7925	BP:nuclear transport;BP:nuclear export;BP:regulation of primary metabolic process;BP:regulation of metabolic process;BP:regulation of mRNA processing;BP:negative regulation of mRNA processing;BP:regulation of response to stimulus;BP:signal transduction;BP:cell surface receptor signaling pathway;BP:organic cyclic compound biosynthetic process;BP:organic cyclic compound metabolic process;BP:RNA bio…	GO:0051169;GO:0051168;GO:0080090;GO:0019222;GO:0050684;GO:0050686;GO:0048583;GO:0007165;GO:0007166;GO:1901362;GO:1901360;GO:0032774;GO:0065003;GO:0010605;GO:0048519;GO:0034622;GO:0060255;GO:0010033;GO:0046483;GO:0019438;GO:0010243;GO:0000398;GO:0006405;GO:0002376;GO:0022607;GO:0009892;GO:0010629;GO:0051028;GO:1901576;GO:0044260;GO:0016043;GO:0065007;GO:0071840;GO:0006369;GO:0006376;GO:0018130;GO:…	K21123	SFRS9	hsa05168;hsa03040	Herpes simplex infection;Spliceosome	COG0724	R:General function prediction only	PF00076.19	RRM_1	RNA recognition motif.	cytoplasmic	10	39	25.5	High
Q17RY6	Lymphocyte antigen 6K OS=Homo sapiens OX=9606 GN=LY6K PE=1 SV=2	0.714216	-0.485567	0.006452	down	yes	0.7335	1.027	BP:regulation of metabolic process;BP:regulation of cellular macromolecule biosynthetic process;BP:regulation of neuron apoptotic process;BP:negative regulation of neuron apoptotic process;BP:signal transduction;BP:cell surface receptor signaling pathway;BP:regulation of primary metabolic process;BP:response to amino acid;BP:cellular response to stimulus;BP:negative regulation of macromolecule me…	GO:0019222;GO:2000112;GO:0043523;GO:0043524;GO:0007165;GO:0007166;GO:0080090;GO:0043200;GO:0051716;GO:0010605;GO:0010608;GO:0043067;GO:0007215;GO:0048519;GO:0060255;GO:0060548;GO:0031669;GO:0010033;GO:0031668;GO:0010243;GO:0031667;GO:0010468;GO:0033554;GO:0009892;GO:0009890;GO:0050789;GO:0071453;GO:0065007;GO:0044699;GO:0009719;GO:0009889;GO:0050794;GO:0006950;GO:0008150;GO:0009267;GO:0042149;GO:…	------	------	------	------	------	------	------	------	------	mitochondrial	1	7	18.7	Medium
Q9BT25	HAUS augmin-like complex subunit 8 OS=Homo sapiens OX=9606 GN=HAUS8 PE=1 SV=3	1.61579	0.692236	0.01755	up	yes	1.085	0.6715	BP:regulation of microtubule polymerization or depolymerization;BP:negative regulation of microtubule polymerization or depolymerization;BP:G2/M transition of mitotic cell cycle;BP:regulation of microtubule depolymerization;BP:cellular component organization or biogenesis;BP:macromolecular complex assembly;BP:negative regulation of cytoskeleton organization;BP:regulation of cytoskeleton organizat…	GO:0031110;GO:0031111;GO:0000086;GO:0031114;GO:0071840;GO:0065003;GO:0051494;GO:0051493;GO:0048519;GO:0051297;GO:1901880;GO:0010639;GO:0070507;GO:0022607;GO:1901879;GO:0043244;GO:0007067;GO:0050789;GO:0097711;GO:0007346;GO:0016043;GO:0051225;GO:0065007;GO:0007049;GO:0050794;GO:0007051;GO:0008150;GO:1901987;GO:0033043;GO:0010564;GO:0051129;GO:0051128;GO:1901990;GO:0032886;GO:0044699;GO:0043242;GO:…	K16591	HAUS8	------	------	------	------	------	------	------	cytoplasmic	2	10	44.8	High
Q9NVV0	Trimeric intracellular cation channel type B OS=Homo sapiens OX=9606 GN=TMEM38B PE=1 SV=1	1.48117	0.566733	0.000896	up	yes	1.042	0.7035	BP:nuclear export;BP:nuclear transport;BP:establishment of organelle localization;BP:cellular component organization or biogenesis;BP:cellular component organization;BP:inorganic cation transmembrane transport;BP:inorganic ion transmembrane transport;BP:potassium ion transport;BP:cation transport;BP:ion transport;BP:transport;BP:biological_process;BP:establishment of localization;BP:intracellular…	GO:0051168;GO:0051169;GO:0051656;GO:0071840;GO:0016043;GO:0098662;GO:0098660;GO:0006813;GO:0006812;GO:0006811;GO:0006810;GO:0008150;GO:0051234;GO:0046907;GO:0071805;GO:0033750;GO:0033753;GO:0042273;GO:0071804;GO:1902578;GO:0022613;GO:0015672;GO:0030001;GO:0055085;GO:0044699;GO:0000055;GO:0000054;GO:0030036;GO:0009987;GO:0030029;GO:0006913;GO:0034220;GO:0044765;GO:0044763;GO:0051649;GO:0051179;GO:…	------	------	------	------	------	------	PF05197.10	TRIC	TRIC channel	peroxisomal	1	4	32.5	Medium
Q8N584	Tetratricopeptide repeat protein 39C OS=Homo sapiens OX=9606 GN=TTC39C PE=2 SV=2	1.31797	0.398317	0.005506	up	yes	0.9865	0.7485	------	------	------	------	------	------	------	------	PF10300.6;PF07719.14;PF10345.6	DUF3808;TPR_2;Cohesin_load	Protein of unknown function;Tetratricopeptide repeat;Cohesin loading factor	cytoplasmic	1	2	65.8	High
P83436	Conserved oligomeric Golgi complex subunit 7 OS=Homo sapiens OX=9606 GN=COG7 PE=1 SV=1	1.23454	0.303969	0.004468	up	yes	0.958	0.776	BP:protein localization;BP:cellular component organization or biogenesis;BP:single-organism metabolic process;BP:cellular macromolecule localization;BP:macromolecule localization;BP:establishment of protein localization;BP:vesicle-mediated transport;BP:protein metabolic process;BP:protein localization to Golgi apparatus;BP:protein stabilization;BP:cellular protein metabolic process;BP:ER to Golgi…	GO:0008104;GO:0071840;GO:0044710;GO:0070727;GO:0033036;GO:0045184;GO:0016192;GO:0019538;GO:0034067;GO:0050821;GO:0044267;GO:0006888;GO:0044260;GO:0006886;GO:0016043;GO:0065007;GO:0065008;GO:0006810;GO:0006952;GO:0043412;GO:0043413;GO:0008150;GO:0008152;GO:0044723;GO:0051234;GO:0006890;GO:0046907;GO:0050896;GO:0031647;GO:0006950;GO:0036211;GO:0044699;GO:0009987;GO:0005975;GO:0007030;GO:0043170;GO:…	K20294	COG7	------	------	------	------	PF10191.6	COG7	Golgi complex component 7	cytoplasmic	4	11	86.3	High
Q8NHH9	Atlastin-2 OS=Homo sapiens OX=9606 GN=ATL2 PE=1 SV=2	1.20918	0.274033	0.04039	up	yes	0.948	0.784	BP:membrane organization;BP:cellular component organization or biogenesis;BP:peptidyl-amino acid modification;BP:vesicle-mediated transport;BP:protein metabolic process;BP:peptidyl-glutamic acid modification;BP:cellular component assembly;BP:cellular protein metabolic process;BP:ER to Golgi vesicle-mediated transport;BP:cellular macromolecule metabolic process;BP:cellular component organization;B…	GO:0061024;GO:0071840;GO:0018193;GO:0016192;GO:0019538;GO:0018200;GO:0022607;GO:0044267;GO:0006888;GO:0044260;GO:0016043;GO:0065003;GO:0044699;GO:0006810;GO:0043412;GO:0036211;GO:0008150;GO:0008152;GO:0051234;GO:0018095;GO:0046907;GO:1990809;GO:0044802;GO:0090158;GO:0051013;GO:0009987;GO:0051259;GO:0007030;GO:0043170;GO:0043933;GO:0071786;GO:0071822;GO:0007029;GO:0051260;GO:0071704;GO:0048193;GO:…	K17339	ATL	------	------	------	------	PF02263.16;PF02841.11	GBP;GBP_C	Guanylate-binding protein, N-terminal domain;Guanylate-binding protein, C-terminal domain	cytoplasmic	7	20	66.2	High
H0YNJ6	GMP reductase OS=Homo sapiens OX=9606 GN=GMPR2 PE=1 SV=1	1.40556	0.49114	0.04181	up	yes	1.012	0.72	BP:purine ribonucleoside monophosphate metabolic process;BP:nucleotide biosynthetic process;BP:small molecule metabolic process;BP:ribonucleoside monophosphate metabolic process;BP:organic cyclic compound biosynthetic process;BP:organic cyclic compound metabolic process;BP:single-organism metabolic process;BP:single-organism biosynthetic process;BP:hypotonic salinity response;BP:GMP metabolic pro…	GO:0009167;GO:0009165;GO:0044281;GO:0009161;GO:1901362;GO:1901360;GO:0044710;GO:0044711;GO:0042539;GO:0046037;GO:1901564;GO:0046128;GO:0055114;GO:0046483;GO:1901566;GO:0006163;GO:0033554;GO:0006164;GO:0019438;GO:0006807;GO:0009651;GO:1901576;GO:1901068;GO:0019637;GO:0071214;GO:0018130;GO:0051716;GO:0009150;GO:0006950;GO:0008150;GO:0008152;GO:0034654;GO:0090407;GO:0044271;GO:0050896;GO:1901293;GO:…	K00364	E1.7.1.7, guaC	hsa00230	Purine metabolism	COG0516	F:Nucleotide transport and metabolism	PF00478.22	IMPDH	IMP dehydrogenase / GMP reductase domain	mitochondrial	3	14	46.9	High
O60512	Beta-1,4-galactosyltransferase 3 OS=Homo sapiens OX=9606 GN=B4GALT3 PE=1 SV=2	1.20485	0.268854	0.04802	up	yes	0.944	0.7835	BP:nuclear transport;BP:nuclear export;BP:RNA splicing, via transesterification reactions with bulged adenosine as nucleophile;BP:small molecule metabolic process;BP:organic cyclic compound biosynthetic process;BP:organic cyclic compound metabolic process;BP:single-organism metabolic process;BP:single-organism biosynthetic process;BP:keratan sulfate metabolic process;BP:glycolipid metabolic proce…	GO:0051169;GO:0051168;GO:0000377;GO:0044281;GO:1901362;GO:1901360;GO:0044710;GO:0044711;GO:0042339;GO:0006664;GO:0006665;GO:0006687;GO:0043436;GO:1901564;GO:0046483;GO:0006082;GO:1901566;GO:0019438;GO:0019538;GO:0000398;GO:0006672;GO:0030203;GO:0018146;GO:0006807;GO:0051028;GO:1901576;GO:0044260;GO:0006682;GO:0006681;GO:0031124;GO:0006369;GO:0006688;GO:0018130;GO:0030148;GO:0006810;GO:0006629;GO:…	K07968	B4GALT3	hsa00510;hsa00533;hsa00601;hsa00514;hsa00515	N-Glycan biosynthesis;Glycosaminoglycan biosynthesis - keratan sulfate;Glycosphingolipid biosynthesis - lacto and neolacto series;Other types of O-glycan biosynthesis;Mannose type O-glycan biosynthesis	------	------	PF13733.3;PF02709.11	Glyco_transf_7N;Glyco_transf_7C	N-terminal region of glycosyl transferase group 7;N-terminal domain of galactosyltransferase	ER	2	14	43.9	High
Q12789	General transcription factor 3C polypeptide 1 OS=Homo sapiens OX=9606 GN=GTF3C1 PE=1 SV=4	1.28326	0.359809	0.0179	up	yes	0.9695	0.7555	BP:regulation of primary metabolic process;BP:regulation of metabolic process;BP:organic cyclic compound biosynthetic process;BP:organic cyclic compound metabolic process;BP:organic substance metabolic process;BP:transcription initiation from RNA polymerase III promoter;BP:transcription from RNA polymerase III promoter;BP:ncRNA processing;BP:regulation of macromolecule metabolic process;BP:matura…	GO:0080090;GO:0019222;GO:1901362;GO:1901360;GO:0071704;GO:0006384;GO:0006383;GO:0034470;GO:0060255;GO:0000462;GO:2001141;GO:0046483;GO:0044249;GO:0050789;GO:0019438;GO:0034660;GO:0097659;GO:1901576;GO:0044260;GO:0065007;GO:0006364;GO:0018130;GO:0006139;GO:0009304;GO:0009889;GO:0009303;GO:0008150;GO:0008152;GO:0034654;GO:0050794;GO:0016070;GO:0016072;GO:0044271;GO:0006355;GO:0010556;GO:0006351;GO:…	K15199	GTF3C1	------	------	------	------	PF04182.9	B-block_TFIIIC	B-block binding subunit of TFIIIC	nuclear	6	4	238.7	High
Q96P48	Arf-GAP with Rho-GAP domain, ANK repeat and PH domain-containing protein 1 OS=Homo sapiens OX=9606 GN=ARAP1 PE=1 SV=3	2.09892	1.06965	0.009199	up	yes	1.167	0.556	BP:regulation of metabolic process;BP:positive regulation of response to stimulus;BP:regulation of response to stimulus;BP:regulation of cell projection assembly;BP:signal transduction;BP:regulation of cell projection organization;BP:cellular component organization or biogenesis;BP:positive regulation of cell projection organization;BP:regulation of actin filament bundle assembly;BP:negative regu…	GO:0019222;GO:0048584;GO:0048583;GO:0060491;GO:0007165;GO:0031344;GO:0071840;GO:0031346;GO:0032231;GO:0032232;GO:0009966;GO:0009967;GO:0051493;GO:0051492;GO:0051491;GO:0044093;GO:0048518;GO:0048519;GO:0060255;GO:0008360;GO:0010639;GO:0001919;GO:0022604;GO:0009893;GO:1901186;GO:1901184;GO:0043547;GO:0051345;GO:0016043;GO:0065007;GO:0043085;GO:0065009;GO:0065008;GO:0051130;GO:0050793;GO:0050790;GO:…	K18439	ARAP1	hsa04144	Endocytosis	COG5347	U:Intracellular trafficking, secretion, and vesicular transport	PF00169.26;PF00620.24;PF01412.15;PF00788.20;PF00536.27;PF07647.14;PF15406.3	PH;RhoGAP;ArfGap;RA;SAM_1;SAM_2;PH_6	PH domain;RhoGAP domain;Putative GTPase activating protein for Arf;Ras association;SAM domain;SAM domain;Pleckstrin homology domain	cytoplasmic	2	3	162.1	High
P15153	Ras-related C3 botulinum toxin substrate 2 OS=Homo sapiens OX=9606 GN=RAC2 PE=1 SV=1	1.40307	0.488585	0.01964	up	yes	1.006	0.717	BP:regulation of protein localization;BP:regulation of intracellular protein transport;BP:regulation of natural killer cell mediated cytotoxicity directed against tumor cell target;BP:regulation of phosphate metabolic process;BP:regulation of primary metabolic process;BP:regulation of metabolic process;BP:regulation of homotypic cell-cell adhesion;BP:regulation of transport;BP:regulation of intra…	GO:0032880;GO:0033157;GO:0002858;GO:0019220;GO:0080090;GO:0019222;GO:0034110;GO:0051049;GO:0032386;GO:0048584;GO:0048583;GO:0002855;GO:0031349;GO:0002705;GO:0050920;GO:0007165;GO:0031341;GO:0031343;GO:0071840;GO:0042330;GO:0009966;GO:0033043;GO:0030168;GO:0048518;GO:0065007;GO:0042127;GO:0051056;GO:0006935;GO:0051050;GO:0060255;GO:0002857;GO:0002824;GO:0045859;GO:0002821;GO:0090316;GO:1903955;GO:…	K07860	RAC2	hsa05212;hsa04650;hsa05210;hsa04024;hsa05418;hsa04670;hsa05231;hsa04510;hsa04062;hsa05416;hsa04310;hsa04370;hsa05200;hsa04071;hsa04662;hsa04014;hsa04664;hsa04666;hsa04010;hsa04810;hsa04015;hsa04520;hsa04360	Pancreatic cancer;Natural killer cell mediated cytotoxicity;Colorectal cancer;cAMP signaling pathway;Fluid shear stress and atherosclerosis;Leukocyte transendothelial migration;Choline metabolism in cancer;Focal adhesion;Chemokine signaling pathway;Viral myocarditis;Wnt signaling pathway;VEGF signaling pathway;Pathways in cancer;Sphingolipid signaling pathway;B cell receptor signaling pathway;Ras…	COG1100	R:General function prediction only	PF00071.19;PF08477.10;PF00025.18	Ras;Roc;Arf	Ras family;Ras of Complex, Roc, domain of DAPkinase;ADP-ribosylation factor family	cytoplasmic	1	21	21.4	High
P05114	Non-histone chromosomal protein HMG-14 OS=Homo sapiens OX=9606 GN=HMGN1 PE=1 SV=3	1.34336	0.425852	0.009467	up	yes	0.982	0.731	BP:response to abiotic stimulus;BP:regulation of phosphate metabolic process;BP:cytokine-mediated signaling pathway;BP:regulation of secretion;BP:positive regulation of secretion;BP:regulation of transport;BP:positive regulation of response to stimulus;BP:regulation of response to stimulus;BP:positive regulation of production of molecular mediator of immune response;BP:cell surface receptor signa…	GO:0009628;GO:0019220;GO:0019221;GO:0051046;GO:0051047;GO:0051049;GO:0048584;GO:0048583;GO:0002702;GO:0007166;GO:0002700;GO:1901360;GO:0080090;GO:0044710;GO:0019222;GO:0009966;GO:0009967;GO:0000165;GO:0030852;GO:0044093;GO:0009314;GO:0048518;GO:0002682;GO:0040034;GO:0042127;GO:1902680;GO:0006283;GO:0006281;GO:0060255;GO:0032784;GO:0032786;GO:0006289;GO:1903708;GO:0032268;GO:0048050;GO:2001141;GO:…	K11299	HMGN1	hsa05168	Herpes simplex infection	------	------	PF01101.15	HMG14_17	HMG14 and HMG17	cytoplasmic	4	28	10.7	High
O15020	Spectrin beta chain, non-erythrocytic 2 OS=Homo sapiens OX=9606 GN=SPTBN2 PE=1 SV=3	1.24487	0.315996	0.03727	up	yes	0.9405	0.7555	BP:regulation of cytoskeleton organization;BP:developmental growth;BP:behavior;BP:regulation of actin polymerization or depolymerization;BP:negative regulation of cytoskeleton organization;BP:signal transduction;BP:multicellular organism growth;BP:single-organism metabolic process;BP:cellular component organization or biogenesis;BP:MAPK cascade;BP:positive regulation of molecular function;BP:nega…	GO:0051493;GO:0048589;GO:0007610;GO:0008064;GO:0051494;GO:0007165;GO:0035264;GO:0044710;GO:0071840;GO:0000165;GO:0044093;GO:0048519;GO:0021692;GO:1901880;GO:0002495;GO:0097485;GO:0065009;GO:0016192;GO:0002504;GO:0044707;GO:0019538;GO:0044708;GO:0010639;GO:0002376;GO:0031333;GO:0032535;GO:0022607;GO:1901879;GO:0006928;GO:0043244;GO:0048002;GO:0035556;GO:0050789;GO:0044267;GO:0006888;GO:0043547;GO:…	K06115	SPTB	------	------	COG5069	Z:Cytoskeleton	PF00435.18;PF00307.28;PF15410.3;PF00169.26;PF11971.5	Spectrin;CH;PH_9;PH;CAMSAP_CH	Spectrin repeat;Calponin homology;Pleckstrin homology domain;PH domain;CAMSAP CH domain	cytoplasmic	11	12	271.2	High
A0A0G2JPR0	Complement C4-A OS=Homo sapiens OX=9606 GN=C4A PE=1 SV=1	1.3079	0.387254	0.002652	up	yes	0.96	0.734	BP:detection of biotic stimulus;BP:detection of chemical stimulus;BP:regulation of primary metabolic process;BP:regulation of metabolic process;BP:regulation of transport;BP:positive regulation of response to stimulus;BP:regulation of response to stimulus;BP:regulation of defense response;BP:single-organism metabolic process;BP:negative regulation of macromolecule metabolic process;BP:response to…	GO:0009595;GO:0009593;GO:0080090;GO:0019222;GO:0051049;GO:0048584;GO:0048583;GO:0031347;GO:0044710;GO:0010605;GO:0043207;GO:0050727;GO:0044092;GO:0048518;GO:0065007;GO:2000425;GO:0098581;GO:0060255;GO:2000257;GO:0032268;GO:0030162;GO:2000427;GO:0002673;GO:0009607;GO:0010033;GO:0009605;GO:0019538;GO:0002376;GO:0045087;GO:0009892;GO:0002920;GO:0050789;GO:0051346;GO:0002684;GO:0002682;GO:0044699;GO:…	K03989	C4	hsa05133;hsa05322;hsa04610;hsa05150	Pertussis;Systemic lupus erythematosus;Complement and coagulation cascades;Staphylococcus aureus infection	------	------	PF07678.11;PF07677.11;PF00207.19;PF01759.18;PF07703.11;PF01835.16;PF10569.6;PF01821.15	A2M_comp;A2M_recep;A2M;NTR;A2M_N_2;A2M_N;Thiol-ester_cl;ANATO	A-macroglobulin complement component;A-macroglobulin receptor;Alpha-2-macroglobulin family;UNC-6/NTR/C345C module;Alpha-2-macroglobulin family N-terminal region;MG2 domain;Alpha-macro-globulin thiol-ester bond-forming region;Anaphylotoxin-like domain	Golgi apparatus	4	3	192.8	High
Q9HAF1	Chromatin modification-related protein MEAF6 OS=Homo sapiens OX=9606 GN=MEAF6 PE=1 SV=1	1.29823	0.37655	0.01444	up	yes	0.9555	0.736	BP:regulation of primary metabolic process;BP:regulation of metabolic process;BP:protein acetylation;BP:internal protein amino acid acetylation;BP:organic substance biosynthetic process;BP:organic cyclic compound biosynthetic process;BP:cellular component organization or biogenesis;BP:histone H3-K14 acetylation;BP:single-organism metabolic process;BP:regulation of signal transduction;BP:peptidyl-…	GO:0080090;GO:0019222;GO:0006473;GO:0006475;GO:1901576;GO:1901362;GO:0071840;GO:0044154;GO:0044710;GO:0009966;GO:0018193;GO:0060255;GO:1901796;GO:0043966;GO:0043967;GO:0043968;GO:0048583;GO:2001141;GO:0046483;GO:0019538;GO:0050789;GO:0018205;GO:0019438;GO:0016569;GO:0097659;GO:0043543;GO:0044260;GO:0016043;GO:0065007;GO:0016570;GO:0016573;GO:0018130;GO:0018393;GO:0018394;GO:0009889;GO:0050794;GO:…	K11344	EAF6	------	------	------	------	PF09340.7	NuA4	Histone acetyltransferase subunit NuA4	cytoplasmic	1	11	21.6	High
Q9BRQ8	Apoptosis-inducing factor 2 OS=Homo sapiens OX=9606 GN=AIFM2 PE=1 SV=1	1.45135	0.537399	0.04924	up	yes	0.992	0.6835	BP:membrane organization;BP:inner mitochondrial membrane organization;BP:mitochondrial membrane organization;BP:mitochondrion organization;BP:single-organism metabolic process;BP:electron transport chain;BP:respiratory electron transport chain;BP:positive regulation of biological process;BP:oxidation-reduction process;BP:cellular response to stress;BP:regulation of apoptotic process;BP:regulation…	GO:0061024;GO:0007007;GO:0007006;GO:0007005;GO:0044710;GO:0022900;GO:0022904;GO:0048518;GO:0055114;GO:0033554;GO:0042981;GO:0050789;GO:0016043;GO:0065007;GO:0071840;GO:0051716;GO:0050794;GO:0006950;GO:0044802;GO:0008152;GO:0012501;GO:0050896;GO:0008150;GO:0042407;GO:0044699;GO:0009987;GO:0006974;GO:0008637;GO:0010942;GO:0006091;GO:0010941;GO:0008219;GO:0043065;GO:0043067;GO:0043068;GO:0006915;GO:…	------	------	------	------	COG1252;COG1251;COG0446	C:Energy production and conversion;	PF07992.11;PF00070.24;PF13738.3	Pyr_redox_2;Pyr_redox;Pyr_redox_3	Pyridine nucleotide-disulphide oxidoreductase;Pyridine nucleotide-disulphide oxidoreductase;Pyridine nucleotide-disulphide oxidoreductase	cytoplasmic	6	24	40.5	High
A0A590UJZ9	Deleted in malignant brain tumors 1 protein OS=Homo sapiens OX=9606 GN=DMBT1 PE=4 SV=1	0.578922	-0.788558	0.03118	down	yes	0.6125	1.058	------	------	------	------	------	------	------	------	PF00530.15;PF00431.17;PF00100.20;PF15494.3	SRCR;CUB;Zona_pellucida;SRCR_2	Scavenger receptor cysteine-rich domain;CUB domain;Zona pellucida-like domain;Scavenger receptor cysteine-rich domain	plasma membrane	1	3	166.5	High
O75886	Signal transducing adapter molecule 2 OS=Homo sapiens OX=9606 GN=STAM2 PE=1 SV=1	1.32028	0.400844	0.002015	up	yes	0.944	0.715	BP:protein localization;BP:negative regulation of response to stimulus;BP:regulation of response to stimulus;BP:membrane organization;BP:cellular component organization or biogenesis;BP:negative regulation of signal transduction;BP:regulation of signal transduction;BP:macromolecule localization;BP:regulation of cell proliferation;BP:endosomal transport;BP:establishment of protein localization;BP:…	GO:0008104;GO:0048585;GO:0048583;GO:0061024;GO:0071840;GO:0009968;GO:0009966;GO:0033036;GO:0042127;GO:0016197;GO:0045184;GO:0022607;GO:1901184;GO:1901185;GO:0006886;GO:0016043;GO:0065007;GO:0006810;GO:0050794;GO:0008150;GO:0051234;GO:0046907;GO:0023057;GO:0010648;GO:0023051;GO:0010646;GO:0044699;GO:0070925;GO:0009987;GO:0048519;GO:0007032;GO:0007033;GO:0007034;GO:0016236;GO:0042059;GO:0042058;GO:…	K04705	STAM	hsa04144;hsa04630	Endocytosis;Jak-STAT signaling pathway	------	------	PF00790.16;PF00018.25;PF07653.14;PF14604.3	VHS;SH3_1;SH3_2;SH3_9	VHS domain;SH3 domain;Variant SH3 domain;Variant SH3 domain	cytoplasmic	1	5	58.1	High
A0A0C4DFX9	Negative elongation factor A OS=Homo sapiens OX=9606 GN=NELFA PE=1 SV=1	1.37276	0.457079	0.02867	up	yes	0.9575	0.6975	BP:regulation of primary metabolic process;BP:regulation of metabolic process;BP:regulation of histone H3-K4 methylation;BP:regulation of histone modification;BP:positive regulation of histone modification;BP:cellular response to stimulus;BP:negative regulation of macromolecule metabolic process;BP:positive regulation of macromolecule metabolic process;BP:positive regulation of biological process…	GO:0080090;GO:0019222;GO:0051569;GO:0031056;GO:0031058;GO:0051716;GO:0010605;GO:0010604;GO:0048518;GO:0048519;GO:0060255;GO:0032784;GO:0032785;GO:0031060;GO:0031062;GO:2001141;GO:0044707;GO:0010638;GO:0010629;GO:0009892;GO:0009893;GO:0009890;GO:0009891;GO:0010628;GO:0050789;GO:1901576;GO:0044260;GO:0065007;GO:0051130;GO:0033554;GO:0050792;GO:0009889;GO:0050794;GO:0043902;GO:0043903;GO:0006950;GO:…	K15179	WHSC2, NELFA	------	------	------	------	------	------	------	cytoplasmic	7	23	58.5	High
P00156	Cytochrome b OS=Homo sapiens OX=9606 GN=MT-CYB PE=1 SV=2	1.34419	0.42674	0.02384	up	yes	0.949	0.706	BP:photosynthesis;BP:single-organism metabolic process;BP:hyperosmotic salinity response;BP:electron transport chain;BP:respiratory electron transport chain;BP:inorganic cation transmembrane transport;BP:animal organ regeneration;BP:inorganic ion transmembrane transport;BP:response to calcium ion;BP:response to metal ion;BP:response to peptide hormone;BP:response to inorganic substance;BP:respons…	GO:0015979;GO:0044710;GO:0042538;GO:0022900;GO:0022904;GO:0098662;GO:0031100;GO:0098660;GO:0051592;GO:0010038;GO:0043434;GO:0010035;GO:0010033;GO:0055114;GO:0009605;GO:0010243;GO:0031667;GO:0042493;GO:0006122;GO:0045471;GO:0015992;GO:0015990;GO:0014070;GO:0006818;GO:0006812;GO:0006811;GO:0006810;GO:0006950;GO:0008150;GO:0008152;GO:0009266;GO:0051234;GO:0036293;GO:0050896;GO:0036296;GO:0015988;GO:…	K00412	CYTB, petB	hsa00190;hsa04260;hsa04932;hsa05016;hsa05010;hsa05012	Oxidative phosphorylation;Cardiac muscle contraction;Non-alcoholic fatty liver diseas;Huntington's disease;Alzheimer's disease;Parkinson's disease	COG1290	C:Energy production and conversion	PF00033.16;PF13631.3;PF00032.14	Cytochrome_B;Cytochrom_B_N_2;Cytochrom_B_C	Cytochrome b/b6/petB;Cytochrome;Cytochrome	cytoplasmic	1	2	42.7	High
Q86VI3	Ras GTPase-activating-like protein IQGAP3 OS=Homo sapiens OX=9606 GN=IQGAP3 PE=1 SV=2	1.29937	0.37781	0.02745	up	yes	0.9245	0.7115	BP:exocytosis;BP:regulation of phosphate metabolic process;BP:regulation of primary metabolic process;BP:regulation of metabolic process;BP:positive regulation of response to stimulus;BP:G1/S transition of mitotic cell cycle;BP:activation of protein kinase activity;BP:protein localization;BP:signal transduction;BP:cellular component organization or biogenesis;BP:cellular response to stimulus;BP:n…	GO:0006887;GO:0019220;GO:0080090;GO:0019222;GO:0048584;GO:0000082;GO:0032147;GO:0008104;GO:0007165;GO:0071840;GO:0051716;GO:0010605;GO:0010604;GO:0070727;GO:0009966;GO:0009967;GO:0000165;GO:0046879;GO:0044093;GO:0048518;GO:0048519;GO:0033036;GO:0042127;GO:0060255;GO:0048583;GO:0045859;GO:0042221;GO:0010033;GO:0016192;GO:0042325;GO:0042327;GO:0019538;GO:0015833;GO:0032535;GO:0009892;GO:0009893;GO:…	K05767	IQGAP2_3	hsa04810	Regulation of actin cytoskeleton	COG5261	Z:Cytoskeleton	PF00616.16;PF03836.12;PF00307.28;PF00612.24	RasGAP;RasGAP_C;CH;IQ	GTPase-activator protein for Ras-like GTPase;RasGAP C-terminus;Calponin homology;IQ calmodulin-binding motif	cytoplasmic	1	3	184.6	High
Q9NRY2	SOSS complex subunit C OS=Homo sapiens OX=9606 GN=INIP PE=1 SV=1	1.37645	0.460956	0.01494	up	yes	0.947	0.688	BP:primary metabolic process;BP:response to radiation;BP:nucleobase-containing compound metabolic process;BP:protein localization;BP:nucleic acid metabolic process;BP:cellular nitrogen compound metabolic process;BP:nitrogen compound metabolic process;BP:protein transport;BP:organic cyclic compound metabolic process;BP:single-organism metabolic process;BP:response to ionizing radiation;BP:cellular…	GO:0044238;GO:0009314;GO:0006139;GO:0008104;GO:0090304;GO:0034641;GO:0006807;GO:0015031;GO:1901360;GO:0044710;GO:0010212;GO:0044260;GO:0045184;GO:0071704;GO:0044699;GO:0071702;GO:0033036;GO:0009987;GO:0044765;GO:0006281;GO:0009306;GO:0006810;GO:0006725;GO:0051716;GO:0006974;GO:0006950;GO:0008150;GO:0008152;GO:0051649;GO:0051234;GO:0051179;GO:1902578;GO:0046483;GO:0009628;GO:0046903;GO:0046907;GO:…	------	------	------	------	------	------	PF15925.2	SOSSC	SOSS complex subunit C	cytoplasmic	1	13	11.4	High
Q14145	Kelch-like ECH-associated protein 1 OS=Homo sapiens OX=9606 GN=KEAP1 PE=1 SV=2	1.26671	0.34109	0.03091	up	yes	0.9095	0.718	BP:regulation of intracellular protein transport;BP:positive regulation of proteasomal ubiquitin-dependent protein catabolic process;BP:regulation of primary metabolic process;BP:regulation of proteasomal ubiquitin-dependent protein catabolic process;BP:regulation of transport;BP:regulation of intracellular transport;BP:negative regulation of intracellular transport;BP:maintenance of location in …	GO:0033157;GO:0032436;GO:0080090;GO:0032434;GO:0051049;GO:0032386;GO:0032387;GO:0051651;GO:0065003;GO:0051716;GO:0010605;GO:0019222;GO:0097066;GO:0070647;GO:0070646;GO:0043433;GO:0032446;GO:1904590;GO:0030856;GO:0044093;GO:0044092;GO:0048518;GO:0048519;GO:0043687;GO:0051051;GO:0060255;GO:0034645;GO:0045185;GO:0051090;GO:0030162;GO:0030163;GO:0010038;GO:2001141;GO:0043436;GO:0042994;GO:0010035;GO:…	K10456	KLHL19, KEAP1, INRF2	hsa05418;hsa04120	Fluid shear stress and atherosclerosis;Ubiquitin mediated proteolysis	------	------	PF01344.22;PF13964.3;PF07707.12;PF13415.3;PF00651.28;PF07646.12;PF13418.3	Kelch_1;Kelch_6;BACK;Kelch_3;BTB;Kelch_2;Kelch_4	Kelch motif;Kelch motif;BTB And C-terminal Kelch;Galactose oxidase, central domain;BTB/POZ domain;Kelch motif;Galactose oxidase, central domain	cytoplasmic	3	11	69.6	High
Q9UPU5	Ubiquitin carboxyl-terminal hydrolase 24 OS=Homo sapiens OX=9606 GN=USP24 PE=1 SV=3	1.24412	0.315128	0.02702	up	yes	0.8995	0.723	BP:learning;BP:memory;BP:behavior;BP:learning or memory;BP:signal transduction;BP:neuropeptide signaling pathway;BP:protein modification by small protein conjugation or removal;BP:protein modification by small protein removal;BP:system process;BP:cell migration;BP:single-multicellular organism process;BP:cell motility;BP:protein metabolic process;BP:protein deubiquitination;BP:single-organism beh…	GO:0007612;GO:0007613;GO:0007610;GO:0007611;GO:0007165;GO:0007218;GO:0070647;GO:0070646;GO:0003008;GO:0016477;GO:0044707;GO:0048870;GO:0019538;GO:0016579;GO:0044708;GO:0006928;GO:0048167;GO:1900452;GO:0050789;GO:0044267;GO:1901575;GO:0044265;GO:0044260;GO:0065007;GO:0044699;GO:0065008;GO:0007186;GO:0050794;GO:0043412;GO:0036211;GO:0008150;GO:0008152;GO:0051603;GO:0050890;GO:0006511;GO:0050803;GO:…	K11840	USP9_24	------	------	COG5077	O:Posttranslational modification, protein turnover, chaperones	PF00443.26;PF13423.3	UCH;UCH_1	Ubiquitin carboxyl-terminal hydrolase;Ubiquitin carboxyl-terminal hydrolase	cytoplasmic	5	3	294.2	High
Q8WVM0	Dimethyladenosine transferase 1, mitochondrial OS=Homo sapiens OX=9606 GN=TFB1M PE=1 SV=1	1.74873	0.806305	0.04943	up	yes	1.03	0.589	BP:regulation of primary metabolic process;BP:regulation of metabolic process;BP:RNA methylation;BP:RNA modification;BP:organic cyclic compound biosynthetic process;BP:cellular component organization or biogenesis;BP:positive regulation of macromolecule metabolic process;BP:cellular developmental process;BP:positive regulation of biological process;BP:rRNA processing;BP:ncRNA processing;BP:regula…	GO:0080090;GO:0019222;GO:0001510;GO:0009451;GO:1901362;GO:0071840;GO:0010604;GO:0048869;GO:0048518;GO:0006364;GO:0034470;GO:0060255;GO:0007283;GO:2001141;GO:0046483;GO:0044702;GO:0000154;GO:0019438;GO:0009893;GO:0009891;GO:0034660;GO:0097659;GO:1901576;GO:0044260;GO:0016043;GO:0031167;GO:0065007;GO:0007005;GO:0032259;GO:0018130;GO:0009889;GO:0050794;GO:0043412;GO:0008150;GO:0008152;GO:0034654;GO:…	K15266	TFB1M	------	------	COG0030	J:Translation, ribosomal structure and biogenesis	PF00398.17	RrnaAD	Ribosomal RNA adenine dimethylase	mitochondrial	2	10	39.5	High
P04921	Glycophorin-C OS=Homo sapiens OX=9606 GN=GYPC PE=1 SV=1	1.30228	0.381035	0.02386	up	yes	0.9155	0.703	BP:cellular cation homeostasis;BP:anion transport;BP:inorganic ion homeostasis;BP:cellular homeostasis;BP:organic anion transport;BP:spermatogenesis;BP:cell-cell adhesion via plasma-membrane adhesion molecules;BP:single organism reproductive process;BP:cell motility;BP:chemical homeostasis;BP:immune system process;BP:bicarbonate transport;BP:digestive tract development;BP:movement of cell or subc…	GO:0030003;GO:0006820;GO:0098771;GO:0019725;GO:0015711;GO:0007283;GO:0098742;GO:0044702;GO:0048870;GO:0048878;GO:0002376;GO:0015701;GO:0048565;GO:0006928;GO:0006885;GO:0065007;GO:0044699;GO:0065008;GO:0006810;GO:0098609;GO:0006811;GO:0008150;GO:0051234;GO:0050801;GO:0051453;GO:0007157;GO:0022610;GO:0008037;GO:0048609;GO:0009987;GO:0006873;GO:0030004;GO:0048232;GO:0055080;GO:0055082;GO:0032502;GO:…	K06576	GYPC, CD236	hsa05144	Malaria	------	------	------	------	------	cytoplasmic	1	20	13.8	High
P03928	ATP synthase protein 8 OS=Homo sapiens OX=9606 GN=MT-ATP8 PE=1 SV=1	1.35165	0.43472	0.04742	up	yes	0.9225	0.6825	BP:purine ribonucleoside monophosphate metabolic process;BP:nucleotide biosynthetic process;BP:small molecule metabolic process;BP:ribonucleoside monophosphate metabolic process;BP:organic cyclic compound biosynthetic process;BP:purine nucleoside biosynthetic process;BP:organic cyclic compound metabolic process;BP:mitochondrion organization;BP:single-organism metabolic process;BP:single-organism …	GO:0009167;GO:0009165;GO:0044281;GO:0009161;GO:1901362;GO:0042451;GO:1901360;GO:0007005;GO:0044710;GO:0044711;GO:1990542;GO:0009199;GO:0098662;GO:0009206;GO:0009205;GO:0009201;GO:0046034;GO:0098660;GO:0007006;GO:0006839;GO:0046129;GO:0046128;GO:0042455;GO:0046483;GO:1901564;GO:1901566;GO:0061024;GO:0006163;GO:0006164;GO:0019637;GO:0009163;GO:0009142;GO:0009144;GO:0009145;GO:1902589;GO:0006807;GO:…	K02125	ATPeF08, MTATP8, ATP8	hsa05016;hsa05010;hsa05012;hsa00190	Huntington's disease;Alzheimer's disease;Parkinson's disease;Oxidative phosphorylation	------	------	PF00895.17	ATP-synt_8	ATP synthase protein 8	extracellular	1	16	8	Medium
P68133	Actin, alpha skeletal muscle OS=Homo sapiens OX=9606 GN=ACTA1 PE=1 SV=1	1.21285	0.278406	0.04976	up	yes	0.8775	0.7235	BP:regulation of metabolic process;BP:cell development;BP:muscle system process;BP:cellular component organization or biogenesis;BP:cellular response to stimulus;BP:response to inorganic substance;BP:positive regulation of macromolecule metabolic process;BP:cellular developmental process;BP:response to mechanical stimulus;BP:positive regulation of biological process;BP:muscle contraction;BP:regul…	GO:0019222;GO:0048468;GO:0003012;GO:0071840;GO:0051716;GO:0010035;GO:0010604;GO:0048869;GO:0009612;GO:0048518;GO:0006936;GO:0060255;GO:0030049;GO:0030048;GO:0010033;GO:0003008;GO:0009605;GO:0010243;GO:0009725;GO:0044707;GO:0009893;GO:0006928;GO:0050789;GO:0016049;GO:0016043;GO:0048741;GO:0065007;GO:0014070;GO:0009719;GO:0008150;GO:0044767;GO:1901698;GO:1901699;GO:0010038;GO:0070887;GO:0010226;GO:…	K12314;K12315;K10354	ACTC1;ACTA1;ACTG2	hsa05410;hsa05414;hsa04260;hsa04261;hsa04270	Hypertrophic cardiomyopath;Dilated cardiomyopathy;Cardiac muscle contraction;Adrenergic signaling in cardiomyocytes;Vascular smooth muscle contraction	COG5277	Z:Cytoskeleton	PF00022.16	Actin	Actin	cytoplasmic	1	49	42	High
P31146	Coronin-1A OS=Homo sapiens OX=9606 GN=CORO1A PE=1 SV=4	0.808281	-0.307071	0.04153	no change	yes	0.7125	0.8815	BP:phagocytosis;BP:positive regulation of homotypic cell-cell adhesion;BP:anatomical structure homeostasis;BP:nerve growth factor signaling pathway;BP:regulation of intracellular transport;BP:regulation of sequestering of calcium ion;BP:regulation of actin polymerization or depolymerization;BP:macromolecular complex subunit organization;BP:regulation of neuron apoptotic process;BP:signal transduc…	GO:0006909;GO:0034112;GO:0060249;GO:0038180;GO:0032386;GO:0051282;GO:0008064;GO:0043933;GO:0043523;GO:0007165;GO:0007166;GO:0060326;GO:0034765;GO:0045055;GO:0071840;GO:0043029;GO:0051716;GO:0042330;GO:0045785;GO:0002260;GO:0051493;GO:0070663;GO:0010959;GO:0043320;GO:0051049;GO:0048518;GO:0048519;GO:0010522;GO:0042127;GO:0031589;GO:0038179;GO:0006935;GO:0051051;GO:0050918;GO:0042129;GO:0050865;GO:…	K13882	CORO1A	hsa04145;hsa05152	Phagosome;Tuberculosis	------	------	PF08954.8;PF08953.8;PF16300.2;PF00400.29;PF12894.4	Trimer_CC;DUF1899;WD40_4;WD40;ANAPC4_WD40	Trimerisation motif;Domain of unknown function;Type of WD40 repeat;WD domain, G-beta repeat;Anaphase-promoting complex subunit 4 WD40 domain	cytoplasmic	2	11	51	High
Q9Y6D6	Brefeldin A-inhibited guanine nucleotide-exchange protein 1 OS=Homo sapiens OX=9606 GN=ARFGEF1 PE=1 SV=2	1.52988	0.613419	0.01955	up	yes	0.96	0.6275	BP:protein localization;BP:regulation of metabolic process;BP:positive regulation of response to stimulus;BP:regulation of response to stimulus;BP:regulation of actin polymerization or depolymerization;BP:signal transduction;BP:regulation of signal transduction;BP:positive regulation of protein kinase B signaling;BP:regulation of protein kinase B signaling;BP:cellular component organization or bi…	GO:0008104;GO:0019222;GO:0048584;GO:0048583;GO:0008064;GO:0007165;GO:0009966;GO:0051897;GO:0051896;GO:0071840;GO:0080090;GO:0010604;GO:0009967;GO:0010256;GO:0044093;GO:0044092;GO:0048518;GO:0048519;GO:0033036;GO:0060255;GO:1903018;GO:0045184;GO:0051129;GO:0016192;GO:0065008;GO:0010639;GO:0031333;GO:0032970;GO:0009893;GO:0009891;GO:0032760;GO:0032940;GO:1903555;GO:0031175;GO:0035556;GO:0043547;GO:…	K18442	ARFGEF, BIG	hsa04144	Endocytosis	COG5307	R:General function prediction only	PF01369.17;PF12783.4;PF16213.2;PF09324.7	Sec7;Sec7_N;DCB;DUF1981	Sec7 domain;Guanine nucleotide exchange factor in Golgi transport N-terminal;Dimerisation and cyclophilin-binding domain of Mon2;Domain of unknown function	cytoplasmic	5	11	208.6	High
Q969F9	Hermansky-Pudlak syndrome 3 protein OS=Homo sapiens OX=9606 GN=HPS3 PE=1 SV=1	1.25501	0.327704	0.02274	up	yes	0.876	0.698	BP:single-organism process;BP:signal transduction;BP:cellular component organization;BP:regulation of biological process;BP:biological regulation;BP:cellular component organization or biogenesis;BP:G-protein coupled receptor signaling pathway;BP:cellular process;BP:regulation of cellular process;BP:biological_process;BP:organelle organization;BP:pigmentation;BP:phospholipase C-activating G-protei…	GO:0044699;GO:0007165;GO:0016043;GO:0050789;GO:0065007;GO:0071840;GO:0007186;GO:0009987;GO:0050794;GO:0008150;GO:0006996;GO:0043473;GO:0007200;GO:0043229;GO:0043227;GO:0043226;GO:0031224;GO:0005737;GO:0031226;GO:0016021;GO:0016020;GO:0043234;GO:0044459;GO:0009986;GO:0005887;GO:0005886;GO:0032991;GO:0031084;GO:0031082;GO:0043231;GO:0005829;GO:0044464;GO:0005575;GO:0044444;GO:0044445;GO:0044424;GO:…	K20190	HPS3	------	------	------	------	PF14763.3;PF14762.3;PF14761.3	HPS3_C;HPS3_Mid;HPS3_N	Hermansky-Pudlak syndrome 3, C-terminal;Hermansky-Pudlak syndrome 3, middle region;Hermansky-Pudlak syndrome 3	cytoplasmic	3	6	113.7	High
P14649	Myosin light chain 6B OS=Homo sapiens OX=9606 GN=MYL6B PE=1 SV=1	1.6678	0.737948	0.03026	up	yes	0.979	0.587	BP:muscle system process;BP:organic cyclic compound metabolic process;BP:skeletal muscle tissue development;BP:interspecies interaction between organisms;BP:multi-organism process;BP:muscle contraction;BP:muscle filament sliding;BP:actin filament-based movement;BP:heterocycle metabolic process;BP:viral RNA genome replication;BP:movement of cell or subcellular component;BP:nitrogen compound metabo…	GO:0003012;GO:1901360;GO:0007519;GO:0044419;GO:0051704;GO:0006936;GO:0030049;GO:0030048;GO:0046483;GO:0039694;GO:0006928;GO:0006807;GO:0044260;GO:0006139;GO:0003008;GO:0009888;GO:0008150;GO:0008152;GO:0016070;GO:0039703;GO:0034641;GO:0044699;GO:0033275;GO:0032502;GO:0032501;GO:0019079;GO:0009987;GO:0006725;GO:0043170;GO:0044033;GO:0090304;GO:0014706;GO:0071704;GO:0030029;GO:0044764;GO:0044763;GO:…	K12751	MYL6	hsa04530;hsa04921;hsa04270	Tight junction;Oxytocin signaling pathway;Vascular smooth muscle contraction	COG5126;COG5126;COG5126	D:Cell cycle control, cell division, chromosome partitioning;Z:Cytoskeleton;T:Signal transduction mechanisms	PF13405.3;PF00036.29;PF13499.3	EF-hand_6;EF-hand_1;EF-hand_7	EF-hand domain;EF hand;EF-hand domain pair	cytoplasmic	1	19	22.8	High
Q75QN2	Integrator complex subunit 8 OS=Homo sapiens OX=9606 GN=INTS8 PE=1 SV=1	1.24545	0.316665	0.04073	up	yes	0.855	0.6865	BP:RNA biosynthetic process;BP:nucleic acid metabolic process;BP:cellular biosynthetic process;BP:cellular nitrogen compound metabolic process;BP:nitrogen compound metabolic process;BP:cellular macromolecule biosynthetic process;BP:ncRNA metabolic process;BP:organic cyclic compound metabolic process;BP:snRNA processing;BP:nucleobase-containing compound metabolic process;BP:cellular macromolecule …	GO:0032774;GO:0090304;GO:0044249;GO:0034641;GO:0006807;GO:0034645;GO:0034660;GO:1901360;GO:0016180;GO:0006139;GO:0044260;GO:0098781;GO:1901362;GO:0071704;GO:0097659;GO:0006366;GO:0006351;GO:0034470;GO:0034472;GO:1901576;GO:0009987;GO:0006725;GO:0031123;GO:0009058;GO:0009059;GO:0008150;GO:0008152;GO:0043628;GO:0034654;GO:0044271;GO:0009301;GO:0046483;GO:0016070;GO:0044238;GO:0016073;GO:0019438;GO:…	K13145	INTS8	------	------	------	------	------	------	------	cytoplasmic	2	4	113	High
J3KR35	Coiled-coil domain containing 12, isoform CRA_a OS=Homo sapiens OX=9606 GN=CCDC12 PE=1 SV=1	1.48094	0.566514	0.02907	up	yes	0.913	0.6165	BP:carboxylic acid metabolic process;BP:nucleic acid metabolic process;BP:cellular nitrogen compound metabolic process;BP:nitrogen compound metabolic process;BP:small molecule metabolic process;BP:ncRNA metabolic process;BP:organic cyclic compound metabolic process;BP:single-organism metabolic process;BP:cellular macromolecule metabolic process;BP:cellular amino acid metabolic process;BP:organic …	GO:0019752;GO:0090304;GO:0034641;GO:0006807;GO:0044281;GO:0034660;GO:1901360;GO:0044710;GO:0044260;GO:0006520;GO:0071704;GO:0044699;GO:0006420;GO:0006139;GO:0009987;GO:0006725;GO:0008150;GO:0008152;GO:0043436;GO:0046483;GO:0016070;GO:0044238;GO:1901564;GO:0006082;GO:0044237;GO:0043170;GO:0006399;GO:0043038;GO:0043039;GO:0006418;GO:0044763;GO:0016592;GO:0043227;GO:0043226;GO:0005737;GO:0005575;GO:…	K12871	CCDC12	hsa03040	Spliceosome	------	------	PF08315.9	cwf18	cwf18 pre-mRNA splicing factor	cytoplasmic	1	4	20.5	Medium
O00488	Zinc finger protein 593 OS=Homo sapiens OX=9606 GN=ZNF593 PE=1 SV=2	1.30909	0.388565	0.01855	up	yes	0.864	0.66	BP:nuclear transport;BP:nuclear export;BP:mitophagy in response to mitochondrial depolarization;BP:cellular response to stimulus;BP:double-strand break repair via nonhomologous end joining;BP:double-strand break repair;BP:MAPK cascade;BP:regulation of cellular amine metabolic process;BP:DNA repair;BP:heterocycle metabolic process;BP:protein metabolic process;BP:positive regulation of catabolic pr…	GO:0051169;GO:0051168;GO:0098779;GO:0051716;GO:0006303;GO:0006302;GO:0000165;GO:0033238;GO:0006281;GO:0046483;GO:0019538;GO:0009896;GO:0009894;GO:0009892;GO:0009893;GO:0009890;GO:0009891;GO:0090263;GO:0000055;GO:1903008;GO:0030177;GO:0035556;GO:0050789;GO:0051340;GO:0051347;GO:0051348;GO:0002684;GO:0002682;GO:1901360;GO:0018130;GO:0019882;GO:0019884;GO:0006629;GO:0043412;GO:0044723;GO:0016070;GO:…	K14821	BUD20	------	------	COG5112	R:General function prediction only	PF12171.5	zf-C2H2_jaz	Zinc-finger double-stranded RNA-binding	cytoplasmic	2	24	15.2	High
O94829	Importin-13 OS=Homo sapiens OX=9606 GN=IPO13 PE=1 SV=3	1.65817	0.729594	0.03192	up	yes	0.9435	0.569	BP:nuclear transport;BP:protein localization;BP:ameboidal-type cell migration;BP:positive regulation of response to stimulus;BP:regulation of response to stimulus;BP:cell chemotaxis;BP:taxis;BP:cellular macromolecule localization;BP:positive regulation of signal transduction;BP:positive regulation of biological process;BP:macromolecule localization;BP:regulation of I-kappaB kinase/NF-kappaB signa…	GO:0051169;GO:0008104;GO:0001667;GO:0048584;GO:0048583;GO:0060326;GO:0042330;GO:0070727;GO:0009967;GO:0048518;GO:0033036;GO:0043122;GO:0043123;GO:0051056;GO:0006935;GO:0045184;GO:0010631;GO:0048870;GO:0035023;GO:0006928;GO:0050789;GO:0006886;GO:0065007;GO:0016477;GO:0035767;GO:0006810;GO:0050794;GO:0008150;GO:1902533;GO:0051234;GO:0046907;GO:0072594;GO:0009966;GO:0051170;GO:0046578;GO:0023056;GO:…	------	------	------	------	------	------	PF08389.9;PF03810.16	Xpo1;IBN_N	Exportin 1-like protein;Importin-beta N-terminal domain	cytoplasmic	1	3	108.1	Medium
Q9Y6V7	Probable ATP-dependent RNA helicase DDX49 OS=Homo sapiens OX=9606 GN=DDX49 PE=1 SV=1	1.729	0.789936	0.007057	up	yes	0.957	0.5535	BP:protein localization;BP:regulation of secretion;BP:regulation of transport;BP:signal transduction;BP:establishment of organelle localization;BP:cellular component organization or biogenesis;BP:organic substance metabolic process;BP:hormone secretion;BP:synaptic vesicle localization;BP:macromolecule localization;BP:rRNA processing;BP:ncRNA processing;BP:establishment of protein localization;BP:…	GO:0008104;GO:0051046;GO:0051049;GO:0007165;GO:0051656;GO:0071840;GO:0071704;GO:0046879;GO:0097479;GO:0033036;GO:0006364;GO:0034470;GO:0045184;GO:0097480;GO:0046483;GO:0016192;GO:0034641;GO:0050789;GO:0022607;GO:0019935;GO:0032940;GO:0019933;GO:0051640;GO:0034660;GO:0035556;GO:0030072;GO:0030073;GO:0044260;GO:0006887;GO:0016043;GO:0045055;GO:0065007;GO:0044699;GO:0065008;GO:0006139;GO:0009306;GO:…	K14778	DDX49, DBP8	------	------	------	------	PF00270.26;PF00271.28;PF04851.12	DEAD;Helicase_C;ResIII	DEAD/DEAH box helicase;Helicase conserved C-terminal domain;Type III restriction enzyme, res subunit	cytoplasmic	6	24	54.2	High
Q14432	cGMP-inhibited 3',5'-cyclic phosphodiesterase A OS=Homo sapiens OX=9606 GN=PDE3A PE=1 SV=3	1.40711	0.492733	0.001712	up	yes	0.871	0.619	BP:cyclic nucleotide catabolic process;BP:organophosphate catabolic process;BP:positive regulation of reproductive process;BP:regulation of reproductive process;BP:cell maturation;BP:nucleotide catabolic process;BP:circulatory system process;BP:signal transduction;BP:vascular process in circulatory system;BP:response to purine-containing compound;BP:organic cyclic compound metabolic process;BP:or…	GO:0009214;GO:0046434;GO:2000243;GO:2000241;GO:0048469;GO:0009166;GO:0003013;GO:0007165;GO:0003018;GO:0014074;GO:1901360;GO:1901361;GO:0044712;GO:0044710;GO:0040020;GO:0048869;GO:0070848;GO:0044093;GO:0048518;GO:0048519;GO:0006664;GO:0006665;GO:0006687;GO:0060548;GO:0043902;GO:0003006;GO:0051591;GO:0010033;GO:0046483;GO:0044248;GO:0044702;GO:1901564;GO:1901565;GO:0010243;GO:0071559;GO:0051783;GO:…	K19021	PDE3A	hsa04022;hsa05032;hsa04924;hsa04024;hsa00230	cGMP-PKG signaling pathway;Morphine addiction;Renin secretion;cAMP signaling pathway;Purine metabolism	------	------	PF00233.16	PDEase_I	3'5'-cyclic nucleotide phosphodiesterase	plasma membrane	2	3	124.9	High
Q9HAN9	Nicotinamide/nicotinic acid mononucleotide adenylyltransferase 1 OS=Homo sapiens OX=9606 GN=NMNAT1 PE=1 SV=1	1.38233	0.467101	0.03485	up	yes	0.8605	0.6225	BP:nucleotide biosynthetic process;BP:small molecule metabolic process;BP:organic cyclic compound biosynthetic process;BP:organic cyclic compound metabolic process;BP:single-organism metabolic process;BP:single-organism biosynthetic process;BP:response to wounding;BP:nicotinamide nucleotide biosynthetic process from aspartate;BP:nicotinamide nucleotide biosynthetic process;BP:oxoacid metabolic pr…	GO:0009165;GO:0044281;GO:1901362;GO:1901360;GO:0044710;GO:0044711;GO:0009611;GO:0019355;GO:0019359;GO:0043436;GO:0046483;GO:0009066;GO:0043648;GO:1901564;GO:1901566;GO:0019637;GO:0019438;GO:0006807;GO:1901576;GO:0051188;GO:0018130;GO:0006950;GO:0008150;GO:0008152;GO:0034654;GO:0090407;GO:0044271;GO:0050896;GO:1901293;GO:0044763;GO:0006753;GO:0019674;GO:0006732;GO:0006733;GO:0044249;GO:0034641;GO:…	K06210	NMNAT	hsa00760	Nicotinate and nicotinamide metabolism	COG1057	H:Coenzyme transport and metabolism	PF01467.23	CTP_transf_like	Cytidylyltransferase-like	nuclear	2	10	31.9	High
P34949	Mannose-6-phosphate isomerase OS=Homo sapiens OX=9606 GN=MPI PE=1 SV=2	1.66547	0.735927	0.01514	up	yes	0.926	0.556	BP:GDP-mannose biosynthetic process;BP:small molecule metabolic process;BP:organic cyclic compound biosynthetic process;BP:cellular component organization or biogenesis;BP:mannose metabolic process;BP:single-organism metabolic process;BP:organic substance metabolic process;BP:heterocycle metabolic process;BP:cell wall glycoprotein biosynthetic process;BP:fungal-type cell wall organization;BP:cell…	GO:0009298;GO:0044281;GO:1901362;GO:0071840;GO:0006013;GO:0044710;GO:0071704;GO:0046483;GO:0031506;GO:0031505;GO:0044249;GO:0019538;GO:0070589;GO:0019637;GO:0019438;GO:0044036;GO:0006807;GO:0044038;GO:1901576;GO:0006057;GO:0006056;GO:0016043;GO:0018130;GO:0019318;GO:0043412;GO:0036211;GO:0008150;GO:0008152;GO:0034654;GO:0000032;GO:0044271;GO:0043413;GO:0019673;GO:0044723;GO:0034641;GO:0045229;GO:…	K01809	manA, MPI	hsa00051;hsa00520	Fructose and mannose metabolism;Amino sugar and nucleotide sugar metabolism	COG1482	G:Carbohydrate transport and metabolism	PF01238.18	PMI_typeI	Phosphomannose isomerase type I	mitochondrial	2	10	46.6	High
Q5JS54	Proteasome assembly chaperone 4 OS=Homo sapiens OX=9606 GN=PSMG4 PE=1 SV=2	1.27095	0.345904	0.0167	up	yes	0.8115	0.6385	BP:exocytosis;BP:neutrophil activation;BP:macromolecular complex subunit organization;BP:cellular macromolecular complex assembly;BP:leukocyte activation;BP:secretion by cell;BP:cellular component assembly;BP:proteasome assembly;BP:macromolecular complex assembly;BP:single-organism process;BP:cellular component organization;BP:neutrophil activation involved in immune response;BP:establishment of …	GO:0006887;GO:0042119;GO:0043933;GO:0034622;GO:0045321;GO:0032940;GO:0022607;GO:0043248;GO:0065003;GO:0044699;GO:0016043;GO:0002283;GO:0051234;GO:0071822;GO:0002263;GO:0045055;GO:0044765;GO:0002366;GO:0071840;GO:0006810;GO:0009987;GO:0001775;GO:0044763;GO:0043623;GO:0051179;GO:1902578;GO:0006461;GO:0046903;GO:0002275;GO:0002274;GO:0043312;GO:0002376;GO:0043299;GO:0002252;GO:0036230;GO:0008150;GO:…	K11878	PSMG4, PAC4	------	------	------	------	PF16093.2	PAC4	Proteasome assembly chaperone 4	cytoplasmic	1	20	13.8	High
Q6PL18	ATPase family AAA domain-containing protein 2 OS=Homo sapiens OX=9606 GN=ATAD2 PE=1 SV=1	0.556338	-0.845966	0.01233	down	yes	0.5135	0.923	BP:regulation of chromosome organization;BP:regulation of primary metabolic process;BP:regulation of metabolic process;BP:organic cyclic compound biosynthetic process;BP:cellular component organization or biogenesis;BP:positive regulation of macromolecule metabolic process;BP:regulation of gene expression, epigenetic;BP:positive regulation of biological process;BP:negative regulation of biologica…	GO:0033044;GO:0080090;GO:0019222;GO:1901362;GO:0071840;GO:0010604;GO:0040029;GO:0048518;GO:0048519;GO:0060255;GO:2001141;GO:0046483;GO:0010639;GO:0019438;GO:0009893;GO:0009891;GO:0010628;GO:0050789;GO:1901576;GO:0044260;GO:0016043;GO:0065007;GO:1901360;GO:0018130;GO:0009889;GO:0050794;GO:0008150;GO:0008152;GO:0034654;GO:0016070;GO:0044271;GO:0006355;GO:0010557;GO:0006357;GO:0006351;GO:2001251;GO:…	------	------	------	------	COG0464	O:Posttranslational modification, protein turnover, chaperones	PF00004.26;PF00439.22	AAA;Bromodomain	ATPase family associated with various cellular activities;Bromodomain	nuclear	1	1	158.5	High
G3V2Y4	Serine hydroxymethyltransferase, mitochondrial (Fragment) OS=Homo sapiens OX=9606 GN=SHMT2 PE=1 SV=1	1.7416	0.800409	0.01562	up	yes	0.9065	0.5205	BP:protein homotetramerization;BP:pteridine-containing compound metabolic process;BP:small molecule biosynthetic process;BP:organic cyclic compound metabolic process;BP:single-organism metabolic process;BP:single-organism biosynthetic process;BP:glycine biosynthetic process;BP:glycine metabolic process;BP:protein modification by small protein conjugation or removal;BP:protein modification by smal…	GO:0051289;GO:0042558;GO:0044283;GO:1901360;GO:0044710;GO:0044711;GO:0006545;GO:0006544;GO:0070647;GO:0070646;GO:0048518;GO:0070536;GO:0042127;GO:0006767;GO:0006766;GO:0006760;GO:0043436;GO:0009070;GO:0010033;GO:0046483;GO:0043648;GO:1901564;GO:1901566;GO:0019538;GO:0016053;GO:0044281;GO:0022607;GO:0006807;GO:0046653;GO:0046655;GO:1901576;GO:0051186;GO:0006563;GO:0044260;GO:0035999;GO:0016043;GO:…	K00600	glyA, SHMT	hsa01523;hsa00670;hsa00630;hsa01230;hsa01200;hsa00260	Antifolate resistance;One carbon pool by folate;Glyoxylate and dicarboxylate metabolism;Biosynthesis of amino acids;Carbon metabolism;Glycine, serine and threonine metabolism	COG0112	E:Amino acid transport and metabolism	PF00464.16	SHMT	Serine hydroxymethyltransferase	cytoplasmic	1	78	25.7	High
Q9Y608	Leucine-rich repeat flightless-interacting protein 2 OS=Homo sapiens OX=9606 GN=LRRFIP2 PE=1 SV=1	1.36772	0.451773	0.00859	up	yes	0.822	0.601	BP:regulation of primary metabolic process;BP:regulation of metabolic process;BP:tRNA pseudouridine synthesis;BP:RNA modification;BP:signal transduction;BP:cell surface receptor signaling pathway;BP:cellular component organization or biogenesis;BP:single-organism metabolic process;BP:ncRNA processing;BP:regulation of macromolecule metabolic process;BP:mitochondrial tRNA modification;BP:mitochondr…	GO:0080090;GO:0019222;GO:0031119;GO:0009451;GO:0007165;GO:0007166;GO:0071840;GO:0044710;GO:0034470;GO:0060255;GO:0070900;GO:0070902;GO:2001141;GO:0046483;GO:0016055;GO:0006807;GO:0034660;GO:0044260;GO:0016043;GO:0065007;GO:0007005;GO:0009889;GO:0050794;GO:0043412;GO:0008150;GO:0008152;GO:0016070;GO:0016071;GO:1900864;GO:0006355;GO:0010556;GO:0044763;GO:0034641;GO:0044699;GO:0006139;GO:0016556;GO:…	------	------	------	------	------	------	PF09738.6	DUF2051	Double stranded RNA binding protein	cytoplasmic	3	6	82.1	High
O94823	Probable phospholipid-transporting ATPase VB OS=Homo sapiens OX=9606 GN=ATP10B PE=2 SV=2	2.2077	1.14254	0.01345	up	yes	0.946	0.4285	BP:membrane organization;BP:anion transport;BP:cellular component organization or biogenesis;BP:protein modification by small protein conjugation or removal;BP:protein modification by small protein conjugation;BP:organic anion transport;BP:lipid translocation;BP:protein metabolic process;BP:protein ubiquitination;BP:protein autoubiquitination;BP:phospholipid transport;BP:cellular protein metaboli…	GO:0061024;GO:0006820;GO:0071840;GO:0070647;GO:0032446;GO:0015711;GO:0034204;GO:0019538;GO:0016567;GO:0051865;GO:0015914;GO:0044267;GO:0016043;GO:0065007;GO:0065008;GO:0006811;GO:0006810;GO:0043412;GO:0036211;GO:0008150;GO:0008152;GO:0051234;GO:0044802;GO:0045332;GO:0006869;GO:0044699;GO:0009987;GO:0097035;GO:0043170;GO:0071704;GO:0071702;GO:0006464;GO:0044765;GO:0044763;GO:0051179;GO:1902578;GO:…	K01530	E3.6.3.1	------	------	COG0474	P:Inorganic ion transport and metabolism	PF16212.2;PF16209.2;PF00702.23;PF13246.3;PF00122.17	PhoLip_ATPase_C;PhoLip_ATPase_N;Hydrolase;Cation_ATPase;E1-E2_ATPase	Phospholipid-translocating P-type ATPase C-terminal;Phospholipid-translocating ATPase N-terminal;haloacid dehalogenase-like hydrolase;Cation transport ATPase;E1-E2 ATPase	mitochondrial	1	1	165.3	Medium
Q9Y2Q5	Ragulator complex protein LAMTOR2 OS=Homo sapiens OX=9606 GN=LAMTOR2 PE=1 SV=1	1.24158	0.312174	0.00471	up	yes	0.7555	0.6085	BP:protein localization;BP:regulation of phosphate metabolic process;BP:regulation of primary metabolic process;BP:regulation of metabolic process;BP:positive regulation of response to stimulus;BP:regulation of response to stimulus;BP:activation of protein kinase activity;BP:signal transduction;BP:signal transduction by protein phosphorylation;BP:response to amino acid;BP:single-organism metaboli…	GO:0008104;GO:0019220;GO:0080090;GO:0019222;GO:0048584;GO:0048583;GO:0032147;GO:0007165;GO:0023014;GO:0043200;GO:0044710;GO:0045786;GO:0010604;GO:0070727;GO:0009966;GO:0009967;GO:0000165;GO:0016192;GO:0044711;GO:0044093;GO:0030855;GO:0048518;GO:0033036;GO:0060255;GO:0045859;GO:0002283;GO:0042221;GO:0002275;GO:1901564;GO:0051128;GO:0010033;GO:0006575;GO:0042325;GO:0042327;GO:1901566;GO:0019538;GO:…	K20398	LAMTOR2	hsa04150	mTOR signaling pathway	------	------	PF03259.14	Robl_LC7	Roadblock/LC7 domain	mitochondrial	2	45	13.5	High
Q9BYD1	39S ribosomal protein L13, mitochondrial OS=Homo sapiens OX=9606 GN=MRPL13 PE=1 SV=1	1.20925	0.274107	0.007751	up	yes	0.7455	0.6165	BP:cellular component organization or biogenesis;BP:peptide biosynthetic process;BP:organonitrogen compound metabolic process;BP:organonitrogen compound biosynthetic process;BP:protein metabolic process;BP:cellular component assembly;BP:ribosomal large subunit assembly;BP:organic substance biosynthetic process;BP:cellular macromolecule metabolic process;BP:cellular component organization;BP:macro…	GO:0071840;GO:0043043;GO:1901564;GO:1901566;GO:0019538;GO:0022607;GO:0000027;GO:1901576;GO:0044260;GO:0016043;GO:0065003;GO:0008150;GO:0008152;GO:0044271;GO:0022411;GO:0006518;GO:0044249;GO:0034641;GO:0034645;GO:0043241;GO:0044699;GO:0022618;GO:0009987;GO:0043604;GO:0043603;GO:0043170;GO:0006807;GO:0043933;GO:0034622;GO:0032984;GO:0071822;GO:0071704;GO:0070126;GO:0070125;GO:0044267;GO:0071826;GO:…	K02871	RP-L13, MRPL13, rplM	hsa03010	Ribosome	COG0102	J:Translation, ribosomal structure and biogenesis	PF00572.15	Ribosomal_L13	Ribosomal protein L13	mitochondrial	1	6	20.7	High
P01344	Insulin-like growth factor II OS=Homo sapiens OX=9606 GN=IGF2 PE=1 SV=1	1.52892	0.612511	0.009641	up	yes	0.8195	0.536	BP:regulation of cell cycle process;BP:negative regulation of lymphocyte mediated immunity;BP:skeletal system development;BP:ossification;BP:regulation of leukocyte mediated immunity;BP:small molecule metabolic process;BP:cellular response to stimulus;BP:regulation of mitotic nuclear division;BP:regulation of protein kinase activity;BP:heterocycle metabolic process;BP:regulation of phosphorylatio…	GO:0010564;GO:0002707;GO:0001501;GO:0001503;GO:0002703;GO:0044281;GO:0051716;GO:0007088;GO:0045859;GO:0046483;GO:0042325;GO:0042327;GO:0009605;GO:0002706;GO:0019538;GO:0010638;GO:0051783;GO:0051781;GO:0002704;GO:0051785;GO:0042692;GO:0009892;GO:0009893;GO:0009890;GO:0009891;GO:0048568;GO:0051254;GO:0010906;GO:0010907;GO:0071902;GO:0071900;GO:0050789;GO:0051347;GO:0006887;GO:0002684;GO:0002682;GO:…	K13769	IGF2	hsa05205	Proteoglycans in cancer	------	------	PF08365.8;PF00049.15	IGF2_C;Insulin	Insulin-like growth factor II E-peptide;Insulin/IGF/Relaxin family	ER	1	9	20.1	Medium
Q6IQ49	Replication stress response regulator SDE2 OS=Homo sapiens OX=9606 GN=SDE2 PE=1 SV=1	1.78252	0.833915	0.005552	up	yes	0.836	0.469	BP:nucleic acid metabolic process;BP:cellular biosynthetic process;BP:cellular nitrogen compound metabolic process;BP:nitrogen compound metabolic process;BP:cellular macromolecule biosynthetic process;BP:organic substance biosynthetic process;BP:organic cyclic compound metabolic process;BP:nucleobase-containing compound metabolic process;BP:cellular macromolecule metabolic process;BP:organic subs…	GO:0090304;GO:0044249;GO:0034641;GO:0006807;GO:0034645;GO:1901576;GO:1901360;GO:0006139;GO:0044260;GO:0071704;GO:0006260;GO:0007049;GO:0044238;GO:0009987;GO:0006725;GO:0009058;GO:0009059;GO:0008150;GO:0008152;GO:0046483;GO:0044699;GO:0051301;GO:0044237;GO:0043170;GO:0006259;GO:0044763;GO:0044424;GO:0043227;GO:0005634;GO:0043226;GO:0043231;GO:0044464;GO:0043229;GO:0005575;GO:0016791;GO:0003676;GO:…	------	------	------	------	------	------	PF13297.3;PF13019.3	Telomere_Sde2_2;Telomere_Sde2	Telomere stability C-terminal;Telomere stability and silencing	cytoplasmic	1	2	49.7	Medium
H0YJ75	Serine/threonine-protein phosphatase 2A 56 kDa regulatory subunit gamma isoform (Fragment) OS=Homo sapiens OX=9606 GN=PPP2R5C PE=1 SV=1	1.65503	0.726858	0.04449	up	yes	0.806	0.487	BP:regulation of phosphate metabolic process;BP:regulation of primary metabolic process;BP:regulation of metabolic process;BP:regulation of cell cycle process;BP:regulation of response to stimulus;BP:regulation of protein phosphatase type 2A activity;BP:signal transduction;BP:signal transduction involved in mitotic DNA damage checkpoint;BP:signal transduction involved in mitotic DNA integrity che…	GO:0019220;GO:0080090;GO:0019222;GO:0010564;GO:0048583;GO:0034047;GO:0007165;GO:1902402;GO:1902403;GO:1902400;GO:0051716;GO:2000134;GO:0045787;GO:0072422;GO:0009966;GO:0048518;GO:0048519;GO:0042127;GO:0060255;GO:0030163;GO:0072413;GO:2000045;GO:0019538;GO:0033554;GO:0035556;GO:0072331;GO:0050789;GO:0072401;GO:0072332;GO:0090068;GO:1901575;GO:0044265;GO:0044260;GO:0065007;GO:0065009;GO:0050790;GO:…	K11584	PPP2R5	hsa04114;hsa04071;hsa03015;hsa04728;hsa04152;hsa04261;hsa04151	Oocyte meiosis;Sphingolipid signaling pathway;mRNA surveillance pathway;Dopaminergic synapse;AMPK signaling pathway;Adrenergic signaling in cardiomyocytes;PI3K-Akt signaling pathway	------	------	PF01603.17	B56	Protein phosphatase 2A regulatory B subunit	cytoplasmic	1	6	64	High
Q6I9Y2	THO complex subunit 7 homolog OS=Homo sapiens OX=9606 GN=THOC7 PE=1 SV=3	1.57173	0.652353	0.006259	up	yes	0.745	0.474	BP:regulation of microtubule polymerization or depolymerization;BP:positive regulation of microtubule polymerization or depolymerization;BP:regulation of microtubule polymerization;BP:regulation of phosphate metabolic process;BP:regulation of primary metabolic process;BP:positive regulation of microtubule polymerization;BP:negative regulation of reproductive process;BP:regulation of reproductive …	GO:0031110;GO:0031112;GO:0031113;GO:0019220;GO:0080090;GO:0031116;GO:2000242;GO:2000241;GO:0000082;GO:0050680;GO:0051168;GO:0007165;GO:0007166;GO:1901362;GO:1901360;GO:0043200;GO:0051716;GO:0007219;GO:0045786;GO:0019222;GO:0051247;GO:0051495;GO:0051493;GO:0071310;GO:0075733;GO:0044419;GO:0042981;GO:0048513;GO:0030856;GO:0044093;GO:0044092;GO:0048518;GO:0048519;GO:0003008;GO:0007088;GO:0042127;GO:…	K13176	THOC7	hsa03013	RNA transport	------	------	PF05615.10	THOC7	Tho complex subunit 7	cytoplasmic	2	19	23.7	High
Q9Y4A5	Transformation/transcription domain-associated protein OS=Homo sapiens OX=9606 GN=TRRAP PE=1 SV=3	1.67452	0.74375	0.03247	up	yes	0.746	0.4455	BP:regulation of primary metabolic process;BP:regulation of metabolic process;BP:protein acetylation;BP:internal protein amino acid acetylation;BP:organic substance biosynthetic process;BP:organic cyclic compound biosynthetic process;BP:organic cyclic compound metabolic process;BP:single-organism metabolic process;BP:positive regulation of macromolecule metabolic process;BP:protein modification b…	GO:0080090;GO:0019222;GO:0006473;GO:0006475;GO:1901576;GO:1901362;GO:1901360;GO:0044710;GO:0010604;GO:0070647;GO:0018193;GO:0060255;GO:0016570;GO:0006281;GO:0043968;GO:2001141;GO:0046483;GO:0030968;GO:0019538;GO:0034641;GO:0018205;GO:0019438;GO:0016569;GO:0022607;GO:0009893;GO:0009891;GO:0006807;GO:1904837;GO:0044267;GO:0044260;GO:0006357;GO:0043967;GO:0016043;GO:0065003;GO:0065007;GO:0071840;GO:…	K08874	TRRAP	hsa05166	HTLV-I infection	COG5032;COG5032;COG5032;COG5032;COG5032	D:Cell cycle control, cell division, chromosome partitioning;B:Chromatin structure and dynamics;L:Replication, recombination and repair;T:Signal transduction mechanisms;U:Intracellular trafficking, secretion, and vesicular transport	PF02259.20;PF00454.24	FAT;PI3_PI4_kinase	FAT domain;Phosphatidylinositol 3- and 4-kinase	cytoplasmic	3	1	437.3	High
Q8TED9	Actin filament-associated protein 1-like 1 OS=Homo sapiens OX=9606 GN=AFAP1L1 PE=1 SV=2	1.80473	0.851786	0.0278	up	yes	0.7625	0.4225	BP:anion transport;BP:hexose phosphate transport;BP:carbohydrate derivative transport;BP:carbohydrate transport;BP:inorganic anion transmembrane transport;BP:inorganic ion transmembrane transport;BP:ion transport;BP:transport;BP:phosphate ion transport;BP:biological_process;BP:establishment of localization;BP:glucose-6-phosphate transport;BP:phosphate ion transmembrane transport;BP:single-organis…	GO:0006820;GO:0015712;GO:1901264;GO:0008643;GO:0098661;GO:0098660;GO:0006811;GO:0006810;GO:0006817;GO:0008150;GO:0051234;GO:0015760;GO:0035435;GO:0044699;GO:0009987;GO:0055085;GO:0071702;GO:0015698;GO:0034220;GO:0044765;GO:0044763;GO:0051179;GO:1902578;GO:0015748;GO:0098656;GO:0005789;GO:0030054;GO:0071437;GO:0031982;GO:0016021;GO:0016020;GO:0098588;GO:0042995;GO:0043234;GO:0043230;GO:0043231;GO:…	------	------	------	------	------	------	PF00169.26	PH	PH domain	cytoplasmic	1	1	86.4	Medium
A0A1C7CYW8	Dynein heavy chain 10, axonemal OS=Homo sapiens OX=9606 GN=DNAH10 PE=1 SV=1	1.99746	0.998166	0.003418	up	yes	0.786	0.3935	BP:movement of cell or subcellular component;BP:single-organism process;BP:cellular process;BP:biological_process;BP:microtubule-based process;BP:microtubule-based movement;BP:single-organism cellular process;CC:supramolecular fiber;CC:polymeric cytoskeletal fiber;CC:cell part;CC:cilium;CC:dynein complex;CC:microtubule;CC:organelle;CC:cytoplasm;CC:intracellular organelle part;CC:integral componen…	GO:0006928;GO:0044699;GO:0009987;GO:0008150;GO:0007017;GO:0007018;GO:0044763;GO:0099512;GO:0099513;GO:0044464;GO:0005929;GO:0030286;GO:0005874;GO:0043226;GO:0005737;GO:0044446;GO:0016021;GO:0005875;GO:0044430;GO:0031224;GO:1902494;GO:0044425;GO:0042995;GO:0043234;GO:0032991;GO:0005575;GO:0044424;GO:0044422;GO:0035639;GO:1901363;GO:0060089;GO:0003674;GO:0004872;GO:0016887;GO:0001883;GO:0001882;GO:…	K10408	DNAH	hsa05016	Huntington's disease	COG5245	Z:Cytoskeleton	PF03028.12;PF08393.10;PF08385.9;PF12774.4;PF12781.4;PF12780.4;PF12775.4;PF12777.4;PF07728.11	Dynein_heavy;DHC_N2;DHC_N1;AAA_6;AAA_9;AAA_8;AAA_7;MT;AAA_5	Dynein heavy chain and region D6 of dynein motor;Dynein heavy chain, N-terminal region 2;Dynein heavy chain, N-terminal region 1;Hydrolytic ATP binding site of dynein motor region D1;ATP-binding dynein motor region D5;P-loop containing dynein motor region D4;P-loop containing dynein motor region D3;Microtubule-binding stalk of dynein motor;AAA domain	cytoplasmic	1	0	521.6	Medium
O75635	Serpin B7 OS=Homo sapiens OX=9606 GN=SERPINB7 PE=1 SV=1	1.97523	0.982019	0.004534	up	yes	0.7575	0.3835	BP:regulation of primary metabolic process;BP:regulation of metabolic process;BP:positive regulation of platelet-derived growth factor production;BP:regulation of platelet-derived growth factor production;BP:signal transduction;BP:negative regulation of macromolecule metabolic process;BP:positive regulation of macromolecule metabolic process;BP:negative regulation of molecular function;BP:positiv…	GO:0080090;GO:0019222;GO:0090362;GO:0090361;GO:0007165;GO:0010605;GO:0010604;GO:0044092;GO:0048518;GO:0048519;GO:0042127;GO:0060255;GO:0072126;GO:0030162;GO:0072124;GO:0009892;GO:0009893;GO:0009891;GO:1901722;GO:0090184;GO:0090183;GO:1901342;GO:0050789;GO:0051346;GO:0065007;GO:0065009;GO:0007186;GO:0050793;GO:0050790;GO:0009889;GO:0090193;GO:0090192;GO:0008150;GO:0051239;GO:0050794;GO:0051336;GO:…	K13964	SERPINB7	------	------	COG4826	O:Posttranslational modification, protein turnover, chaperones	PF00079.17	Serpin	Serpin	cytoplasmic	1	3	42.9	High
